# Supplementary material for: Trans-eQTLs Can Be Used to Identify Tissue-Specific Gene Regulatory Networks
Source: Preprints.org preprint supplement (doi:10.20944/preprints202401.0546.v3), 2024-09-25
Supplement: Supplementary file 1 [file supplementary]

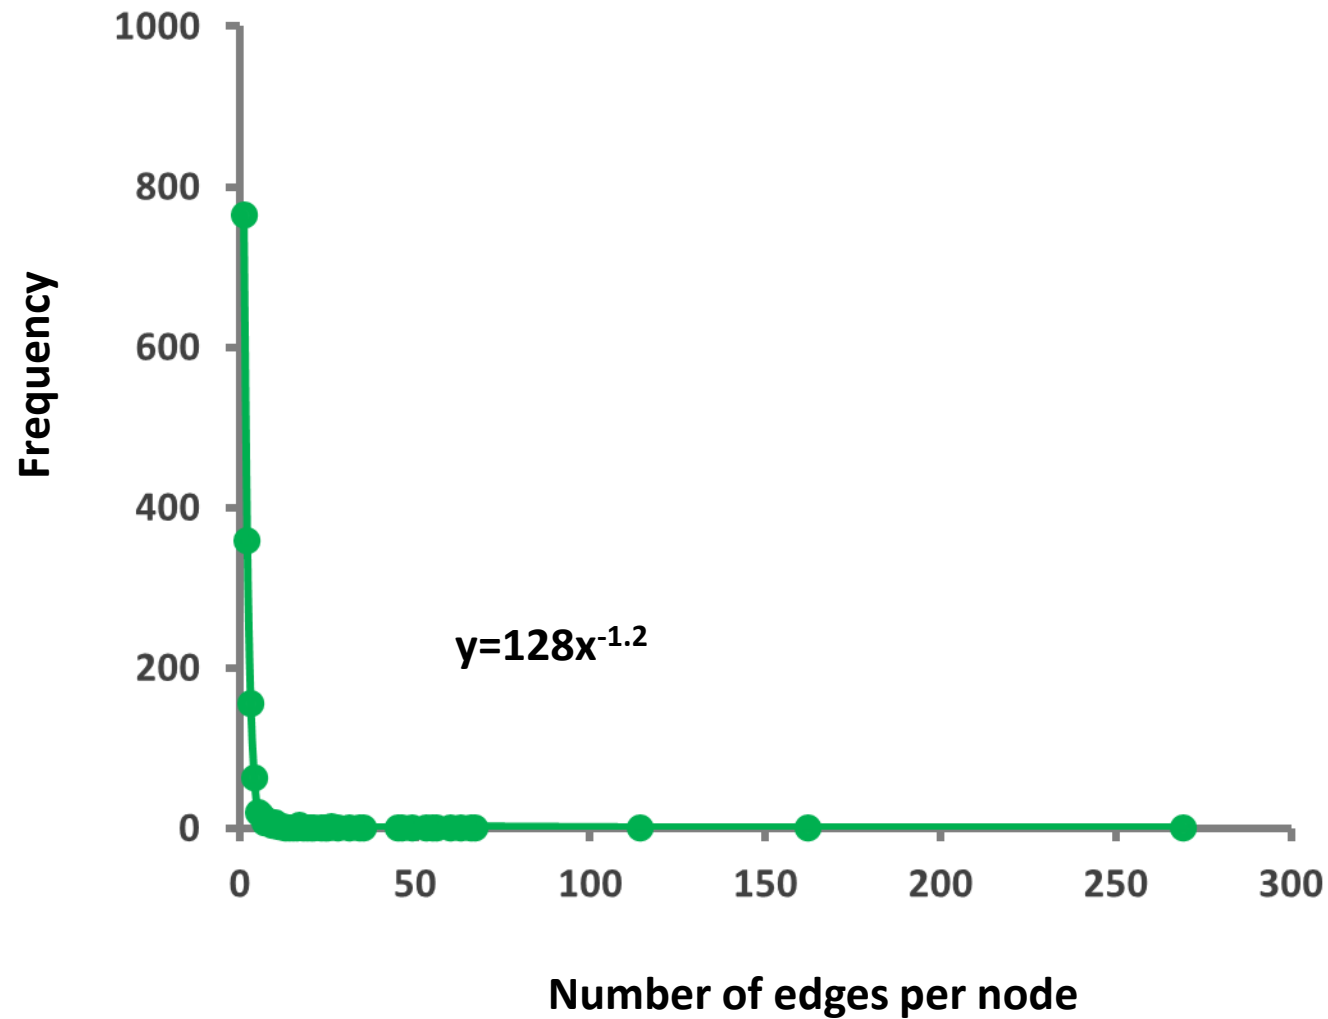

**Figure S1. The distribution of edges per node in the network show power law distribution.** Majority of nodes have few edges, while a few nodes (i.e. hub genes) account for a large number of edges. To generate the graph, number of edges per node was calculated, then nodes (N=1,460) were grouped according to their number of edges and the graph was generated by plotting groups by their frequencies.
