# Supplementary material for: Trans-eQTLs Can Be Used to Identify Tissue-Specific Gene Regulatory Networks
Source: Preprints.org preprint supplement (doi:10.20944/preprints202401.0546.v3), 2024-09-25
Supplement: Supplementary file 1 [file supplementary]

## Sheet: Table S1
	Table S1. Gene-pairs identified through Mendelian randomization and the nature of association between them
	Source gene information				Target gene information				Mendelian randomization				In the network
	Ensembl gene ID	Gene symbol	Chr	bp	Ensembl gene ID	Gene symbol	Chr	bp	B	SE	P	NSNP
	ENSG00000142599	RERE	1	8645079	ENSG00000036448	MYOM2	8	2053315	-0.107128	0.0184645	6.55891e-09	3	yes
	ENSG00000142599	RERE	1	8645079	ENSG00000102471	NDFIP2	13	80092748	-0.11248	0.0184474	1.0783e-09	3	yes
	ENSG00000142599	RERE	1	8645079	ENSG00000103479	RBL2	16	53496725	-0.104703	0.0184085	1.28717e-08	3	yes
	ENSG00000142599	RERE	1	8645079	ENSG00000171101	SIGLEC17P	19	51673682	-0.138908	0.020475	1.16648e-11	3	yes
	ENSG00000116685	KIAA2013	1	11983066	ENSG00000261819	RP11-680G24.4	16	15083066	-0.218694	0.0209032	1.28799e-25	3	yes
	ENSG00000083444	PLOD1	1	12014928	ENSG00000261819	RP11-680G24.4	16	15083066	-0.266115	0.0265575	1.24108e-23	5	yes
	ENSG00000116688	MFN2	1	12056904	ENSG00000261819	RP11-680G24.4	16	15083066	-0.199661	0.0186623	1.03246e-26	3	yes
	ENSG00000075151	EIF4G3	1	21318170	ENSG00000138613	APH1B	15	63584771	-0.877026	0.136519	1.3256e-10	3	yes
	ENSG00000076864	RAP1GAP	1	21959254	ENSG00000183508	FAM46C	1	118159775	0.240691	0.0382875	3.24923e-10	4	yes
	ENSG00000076864	RAP1GAP	1	21959254	ENSG00000172331	BPGM	7	134348062	0.284152	0.0347264	2.77786e-16	6	yes
	ENSG00000179163	FUCA1	1	24183175	ENSG00000228217	ENSG00000228217	1	118320918	0.781707	0.0938598	8.19105e-17	5	yes
	ENSG00000233621	RP11-422J8.1	1	37930246	ENSG00000170899	GSTA4	6	52851463	0.0687505	0.0113438	1.35589e-09	3	yes
	ENSG00000233621	RP11-422J8.1	1	37930246	ENSG00000166927	MS4A7	11	60154689	0.0702629	0.0113699	6.42112e-10	3	yes
	ENSG00000233621	RP11-422J8.1	1	37930246	ENSG00000166165	CKB	14	103987722	0.0650702	0.0113164	8.92012e-09	3	yes
	ENSG00000163877	SNIP1	1	38011022	ENSG00000170899	GSTA4	6	52851463	0.365135	0.0539915	1.35326e-11	3	yes
	ENSG00000163877	SNIP1	1	38011022	ENSG00000166927	MS4A7	11	60154689	0.373	0.054668	8.91573e-12	3	yes
	ENSG00000163877	SNIP1	1	38011022	ENSG00000166165	CKB	14	103987722	0.324032	0.053713	1.61285e-09	3	yes
	ENSG00000198160	MIER1	1	67422440	ENSG00000092096	SLC22A17	14	23818818	0.166108	0.0276646	1.92095e-09	3	no
	ENSG00000183508	FAM46C	1	118159775	ENSG00000137198	GMPR	6	16267295	0.633725	0.0548149	6.48091e-31	5	yes
	ENSG00000183508	FAM46C	1	118159775	ENSG00000198876	DCAF12	9	34106891	0.480582	0.0546766	1.5017e-18	5	yes
	ENSG00000183508	FAM46C	1	118159775	ENSG00000107521	HPS1	10	100191319	0.257685	0.0416056	5.8838e-10	6	yes
	ENSG00000183508	FAM46C	1	118159775	ENSG00000206177	HBM	16	210329	-0.283226	0.0438003	1.00423e-10	5	yes
	ENSG00000183508	FAM46C	1	118159775	ENSG00000004939	SLC4A1	17	42335631	0.395228	0.0489002	6.35287e-16	5	yes
	ENSG00000183508	FAM46C	1	118159775	ENSG00000090674	MCOLN1	19	7593203	0.33885	0.046318	2.55995e-13	4	yes
	ENSG00000183508	FAM46C	1	118159775	ENSG00000105281	SLC1A5	19	47284995	0.264258	0.0404004	6.11117e-11	7	yes
	ENSG00000092621	PHGDH	1	120244629	ENSG00000139514	SLC7A1	13	30126686	0.268916	0.0445737	1.60868e-09	5	no
	ENSG00000163131	CTSS	1	150720492	ENSG00000182578	CSF1R	5	149462894	0.144929	0.026256	3.39325e-08	4	yes
	ENSG00000163131	CTSS	1	150720492	ENSG00000166927	MS4A7	11	60154689	0.216725	0.0300768	5.77333e-13	7	yes
	ENSG00000163131	CTSS	1	150720492	ENSG00000166928	MS4A14	11	60165582	1.05705	0.0990999	1.46079e-26	5	yes
	ENSG00000163221	S100A12	1	153347154	ENSG00000075945	KIFAP3	1	169972408	-0.0875477	0.013605	1.23513e-10	6	yes
	ENSG00000143569	UBAP2L	1	154218320	ENSG00000268034	AC005795.1	19	42012441	0.384724	0.0527168	2.92179e-13	3	no
	ENSG00000173171	MTX1	1	155181052	ENSG00000203813	HIST1H3H	6	27778078	-0.145612	0.024538	2.95405e-09	3	yes
	ENSG00000163374	YY1AP1	1	155644014	ENSG00000158373	HIST1H2BD	6	26164963	-0.32073	0.0492195	7.20585e-11	3	yes
	ENSG00000163374	YY1AP1	1	155644014	ENSG00000197459	HIST1H2BH	6	26252091	-0.409165	0.0493882	1.18436e-16	4	yes
	ENSG00000160789	LMNA	1	156081122	ENSG00000028137	TNFRSF1B	1	12248172	-0.297537	0.0511296	5.9102e-09	6	yes
	ENSG00000196189	SEMA4A	1	156132350	ENSG00000177674	AGTRAP	1	11805500	-0.150813	0.0248364	1.2613e-09	7	yes
	ENSG00000196189	SEMA4A	1	156132350	ENSG00000028137	TNFRSF1B	1	12248172	-0.162058	0.0258068	3.39281e-10	5	yes
	ENSG00000196189	SEMA4A	1	156132350	ENSG00000117676	RPS6KA1	1	26878886	-0.174233	0.0258743	1.65224e-11	5	yes
	ENSG00000196189	SEMA4A	1	156132350	ENSG00000186501	TMEM222	1	27655771	-0.161492	0.0249562	9.73323e-11	7	yes
	ENSG00000196189	SEMA4A	1	156132350	ENSG00000169403	PTAFR	1	28497062	-0.199576	0.0252624	2.78651e-15	6	yes
	ENSG00000196189	SEMA4A	1	156132350	ENSG00000162747	FCGR3B	1	161597369	-0.202851	0.0280516	4.7817e-13	6	yes
	ENSG00000196189	SEMA4A	1	156132350	ENSG00000163464	CXCR1	2	219029643	-0.203173	0.0259128	4.48197e-15	5	yes
	ENSG00000196189	SEMA4A	1	156132350	ENSG00000135926	TMBIM1	2	219148112	-0.140679	0.0250406	1.93123e-08	6	yes
	ENSG00000196189	SEMA4A	1	156132350	ENSG00000241553	ARPC4	3	9844607	-0.201065	0.0270375	1.03361e-13	7	yes
	ENSG00000196189	SEMA4A	1	156132350	ENSG00000203813	HIST1H3H	6	27778078	-0.658565	0.0648236	3.01093e-24	4	yes
	ENSG00000196189	SEMA4A	1	156132350	ENSG00000137409	MTCH1	6	36944995	-0.185393	0.0249024	9.70884e-14	7	yes
	ENSG00000196189	SEMA4A	1	156132350	ENSG00000112195	TREML2	6	41163473	-0.180857	0.0255356	1.41555e-12	6	yes
	ENSG00000196189	SEMA4A	1	156132350	ENSG00000146859	TMEM140	7	134841737	-0.151789	0.0261111	6.12843e-09	5	yes
	ENSG00000196189	SEMA4A	1	156132350	ENSG00000122694	GLIPR2	9	36150321	-0.156638	0.025335	6.30231e-10	6	yes
	ENSG00000196189	SEMA4A	1	156132350	ENSG00000117984	CTSD	11	1779602	-0.248662	0.0291714	1.5391e-17	5	yes
	ENSG00000196189	SEMA4A	1	156132350	ENSG00000100439	ABHD4	14	23074205	-0.196222	0.0250536	4.79854e-15	7	yes
	ENSG00000196189	SEMA4A	1	156132350	ENSG00000241839	PLEKHO2	15	65147147	-0.184719	0.0254025	3.55008e-13	6	yes
	ENSG00000196189	SEMA4A	1	156132350	ENSG00000178789	CD300LB	17	72522463	-0.180372	0.0253274	1.0666e-12	6	yes
	ENSG00000196189	SEMA4A	1	156132350	ENSG00000129353	SLC44A2	19	10734184	-0.165744	0.0248006	2.34012e-11	7	yes
	ENSG00000196189	SEMA4A	1	156132350	ENSG00000105612	DNASE2	19	12989153	-0.181004	0.025284	8.13658e-13	6	yes
	ENSG00000196189	SEMA4A	1	156132350	ENSG00000125970	RALY	20	32638783	-0.193437	0.0247341	5.25557e-15	7	yes
	ENSG00000196189	SEMA4A	1	156132350	ENSG00000101160	CTSZ	20	57576271	-0.203307	0.0247802	2.31732e-16	7	yes
	ENSG00000196189	SEMA4A	1	156132350	ENSG00000101150	TPD52L2	20	62509770	-0.142651	0.024825	9.1241e-09	7	yes
	ENSG00000196189	SEMA4A	1	156132350	ENSG00000100060	MFNG	22	37873770	-0.153027	0.0261032	4.56256e-09	5	yes
	ENSG00000160781	PAQR6	1	156215543	ENSG00000177674	AGTRAP	1	11805500	-0.101818	0.0171828	3.11219e-09	3	yes
	ENSG00000160781	PAQR6	1	156215543	ENSG00000028137	TNFRSF1B	1	12248172	-0.107271	0.0171218	3.72436e-10	3	yes
	ENSG00000160781	PAQR6	1	156215543	ENSG00000142634	EFHD2	1	15746615	-0.0984184	0.0171332	9.2303e-09	3	yes
	ENSG00000160781	PAQR6	1	156215543	ENSG00000117676	RPS6KA1	1	26878886	-0.112168	0.0171957	6.89029e-11	3	yes
	ENSG00000160781	PAQR6	1	156215543	ENSG00000186501	TMEM222	1	27655771	-0.102834	0.0172546	2.52573e-09	3	yes
	ENSG00000160781	PAQR6	1	156215543	ENSG00000169403	PTAFR	1	28497062	-0.13419	0.0172287	6.76647e-15	3	yes
	ENSG00000160781	PAQR6	1	156215543	ENSG00000215717	TMEM167B	1	109636456	-0.122267	0.0187958	7.76685e-11	3	yes
	ENSG00000160781	PAQR6	1	156215543	ENSG00000162747	FCGR3B	1	161597369	-0.11458	0.0188376	1.18314e-09	3	yes
	ENSG00000160781	PAQR6	1	156215543	ENSG00000136689	IL1RN	2	113878192	-0.199056	0.0172378	7.58833e-31	3	yes
	ENSG00000160781	PAQR6	1	156215543	ENSG00000163464	CXCR1	2	219029643	-0.123686	0.0172123	6.67838e-13	3	yes
	ENSG00000160781	PAQR6	1	156215543	ENSG00000135926	TMBIM1	2	219148112	-0.110114	0.0171216	1.26502e-10	3	yes
	ENSG00000160781	PAQR6	1	156215543	ENSG00000241553	ARPC4	3	9844607	-0.149934	0.0188278	1.67368e-15	3	yes
	ENSG00000160781	PAQR6	1	156215543	ENSG00000198624	CCDC69	5	150582159	-0.0997687	0.0171808	6.36007e-09	3	yes
	ENSG00000160781	PAQR6	1	156215543	ENSG00000137409	MTCH1	6	36944995	-0.120041	0.0171544	2.60274e-12	3	yes
	ENSG00000160781	PAQR6	1	156215543	ENSG00000112195	TREML2	6	41163473	-0.115538	0.0172079	1.89076e-11	3	yes
	ENSG00000160781	PAQR6	1	156215543	ENSG00000122694	GLIPR2	9	36150321	-0.107619	0.0171908	3.84281e-10	3	yes
	ENSG00000160781	PAQR6	1	156215543	ENSG00000117984	CTSD	11	1779602	-0.146923	0.0188643	6.7863e-15	3	yes
	ENSG00000160781	PAQR6	1	156215543	ENSG00000174744	BRMS1	11	66108700	-0.10083	0.0171054	3.75526e-09	3	yes
	ENSG00000160781	PAQR6	1	156215543	ENSG00000139112	GABARAPL1	12	10370392	-0.09427	0.0171961	4.20424e-08	3	yes
	ENSG00000160781	PAQR6	1	156215543	ENSG00000241839	PLEKHO2	15	65147147	-0.111762	0.017537	1.85462e-10	3	yes
	ENSG00000160781	PAQR6	1	156215543	ENSG00000178789	CD300LB	17	72522463	-0.130923	0.0171081	1.96819e-14	3	yes
	ENSG00000160781	PAQR6	1	156215543	ENSG00000129353	SLC44A2	19	10734184	-0.0980858	0.0171746	1.12248e-08	3	yes
	ENSG00000160781	PAQR6	1	156215543	ENSG00000105612	DNASE2	19	12989153	-0.112544	0.0171396	5.15776e-11	3	yes
	ENSG00000160781	PAQR6	1	156215543	ENSG00000196562	SULF2	20	46350226	-0.09997	0.0172336	6.59761e-09	3	yes
	ENSG00000160781	PAQR6	1	156215543	ENSG00000101160	CTSZ	20	57576271	-0.136795	0.01724	2.10887e-15	3	yes
	ENSG00000160781	PAQR6	1	156215543	ENSG00000101150	TPD52L2	20	62509770	-0.1272	0.01727	1.76618e-13	3	yes
	ENSG00000160781	PAQR6	1	156215543	ENSG00000243646	IL10RB	21	34654101	-0.0946693	0.0172352	3.9563e-08	3	yes
	ENSG00000160781	PAQR6	1	156215543	ENSG00000100060	MFNG	22	37873770	-0.0942219	0.0171248	3.7533e-08	3	yes
	ENSG00000198715	C1orf85	1	156262671	ENSG00000186501	TMEM222	1	27655771	-0.0656849	0.0109122	1.75071e-09	3	yes
	ENSG00000198715	C1orf85	1	156262671	ENSG00000215717	TMEM167B	1	109636456	-0.0755136	0.0118346	1.76219e-10	3	yes
	ENSG00000198715	C1orf85	1	156262671	ENSG00000162747	FCGR3B	1	161597369	-0.0744195	0.0120939	7.57989e-10	3	yes
	ENSG00000198715	C1orf85	1	156262671	ENSG00000241553	ARPC4	3	9844607	-0.0974289	0.0119086	2.8061e-16	3	yes
	ENSG00000198715	C1orf85	1	156262671	ENSG00000198624	CCDC69	5	150582159	-0.0630982	0.010835	5.76079e-09	3	yes
	ENSG00000198715	C1orf85	1	156262671	ENSG00000184840	TMED9	5	177021142	-0.0654445	0.0118131	3.02485e-08	3	yes
	ENSG00000198715	C1orf85	1	156262671	ENSG00000137409	MTCH1	6	36944995	-0.0775026	0.0108409	8.73746e-13	3	yes
	ENSG00000198715	C1orf85	1	156262671	ENSG00000174744	BRMS1	11	66108700	-0.065367	0.0108359	1.61514e-09	3	yes
	ENSG00000198715	C1orf85	1	156262671	ENSG00000241839	PLEKHO2	15	65147147	-0.0698339	0.010931	1.67373e-10	3	yes
	ENSG00000198715	C1orf85	1	156262671	ENSG00000100060	MFNG	22	37873770	-0.0616286	0.0108217	1.23455e-08	3	yes
	ENSG00000213085	CCDC19	1	159856053	ENSG00000253676	TAGLN2P1	8	107709948	1.24497	0.124118	1.11887e-23	3	yes
	ENSG00000158710	TAGLN2	1	159891709	ENSG00000253676	TAGLN2P1	8	107709948	0.735804	0.0658468	5.43634e-29	5	yes
	ENSG00000158769	F11R	1	160986892	ENSG00000135838	NPL	1	182778973	-0.464065	0.0553566	5.15124e-17	5	yes
	ENSG00000116679	IVNS1ABP	1	185275990	ENSG00000109956	B3GAT1	11	134265105	-0.336589	0.0503531	2.31601e-11	3	yes
	ENSG00000170128	GPR25	1	200842694	ENSG00000162630	B3GALT2	1	193151979	-0.282042	0.0507687	2.76928e-08	3	yes
	ENSG00000159388	BTG2	1	203276674	ENSG00000181788	SIAH2	3	150470089	-0.307609	0.0502414	9.20488e-10	3	yes
	ENSG00000159388	BTG2	1	203276674	ENSG00000065491	TBC1D22B	6	37263147	-0.269465	0.0482787	2.38525e-08	3	yes
	ENSG00000133069	TMCC2	1	205219887	ENSG00000007968	E2F2	1	23845317	0.702454	0.106023	3.46105e-11	3	yes
	ENSG00000133069	TMCC2	1	205219887	ENSG00000181788	SIAH2	3	150470089	-0.38891	0.0509126	2.19284e-14	5	yes
	ENSG00000133069	TMCC2	1	205219887	ENSG00000198876	DCAF12	9	34106891	0.635027	0.0887799	8.50099e-13	4	yes
	ENSG00000133069	TMCC2	1	205219887	ENSG00000165006	UBAP1	9	34215762	0.496864	0.0894302	2.76204e-08	4	yes
	ENSG00000133069	TMCC2	1	205219887	ENSG00000206177	HBM	16	210329	-0.483333	0.084399	1.02361e-08	4	yes
	ENSG00000133069	TMCC2	1	205219887	ENSG00000141098	GFOD2	16	67730879	0.688637	0.081519	2.97442e-17	5	yes
	ENSG00000133069	TMCC2	1	205219887	ENSG00000141098	GFOD2	16	67730879	0.688637	0.081519	2.97442e-17	5	yes
	ENSG00000133069	TMCC2	1	205219887	ENSG00000105610	KLF1	19	12996616	0.66026	0.094269	2.48744e-12	4	yes
	ENSG00000163545	NUAK2	1	205281035	ENSG00000141098	GFOD2	16	67730879	-0.410287	0.0654535	3.64841e-10	3	yes
	ENSG00000197520	FAM177B	1	222917348	ENSG00000219201	ENSG00000219201	1	78277064	-0.519574	0.0842541	6.97077e-10	3	yes
	ENSG00000162722	TRIM58	1	248031004	ENSG00000168274	HIST1H2AE	6	26217438	-0.668765	0.0505689	6.30892e-40	6	yes
	ENSG00000238243	OR2W3	1	248045863	ENSG00000034152	MAP2K3	17	21203268	0.410902	0.0590492	3.43595e-12	5	yes
	ENSG00000238243	OR2W3	1	248045863	ENSG00000172270	BSG	19	577395	0.403019	0.0555918	4.17946e-13	6	yes
	ENSG00000237803	LINC00211	2	38078403	ENSG00000185052	SLC24A3	20	19448435	-0.194101	0.0345664	1.96219e-08	3	yes
	ENSG00000231826	AC016735.2	2	43260839	ENSG00000162444	RBP7	1	10066671	-0.235437	0.0359441	5.75078e-11	3	yes
	ENSG00000231826	AC016735.2	2	43260839	ENSG00000135838	NPL	1	182778973	-0.204321	0.0348407	4.5068e-09	3	yes
	ENSG00000231826	AC016735.2	2	43260839	ENSG00000138061	CYP1B1	2	38315580	-0.29702	0.0416536	9.98509e-13	3	yes
	ENSG00000231826	AC016735.2	2	43260839	ENSG00000144136	SLC20A1	2	113412419	0.196363	0.0342902	1.02514e-08	3	yes
	ENSG00000231826	AC016735.2	2	43260839	ENSG00000071967	CYBRD1	2	172396700	0.25117	0.0370698	1.23891e-11	3	yes
	ENSG00000231826	AC016735.2	2	43260839	ENSG00000196549	MME	3	154821705	-0.194393	0.0340766	1.16617e-08	3	yes
	ENSG00000231826	AC016735.2	2	43260839	ENSG00000113108	APBB3	5	139955595	-0.191358	0.0340743	1.95553e-08	3	yes
	ENSG00000231826	AC016735.2	2	43260839	ENSG00000112299	VNN1	6	133018958	-0.205859	0.036307	1.42825e-08	3	yes
	ENSG00000231826	AC016735.2	2	43260839	ENSG00000213694	S1PR3	9	91613143	-0.217879	0.038283	1.26096e-08	3	yes
	ENSG00000231826	AC016735.2	2	43260839	ENSG00000085265	FCN1	9	137805620	-0.272991	0.0360223	3.49834e-14	3	yes
	ENSG00000231826	AC016735.2	2	43260839	ENSG00000149573	MPZL2	11	118129684	0.24851	0.0393062	2.575e-10	3	yes
	ENSG00000231826	AC016735.2	2	43260839	ENSG00000084234	APLP2	11	129977215	-0.201369	0.034994	8.69573e-09	3	yes
	ENSG00000231826	AC016735.2	2	43260839	ENSG00000121316	PLBD1	12	14688939	-0.263184	0.0404646	7.81857e-11	3	yes
	ENSG00000231826	AC016735.2	2	43260839	ENSG00000030582	GRN	17	42426542	-0.257995	0.0384428	1.931e-11	3	yes
	ENSG00000231826	AC016735.2	2	43260839	ENSG00000197632	SERPINB2	18	61555025	-0.230698	0.0393811	4.68219e-09	3	yes
	ENSG00000231826	AC016735.2	2	43260839	ENSG00000170866	LILRA3	19	54804903	-0.271732	0.0437202	5.12399e-10	3	yes
	ENSG00000231826	AC016735.2	2	43260839	ENSG00000124107	SLPI	20	43882042	0.190354	0.0331702	9.54014e-09	3	yes
	ENSG00000231826	AC016735.2	2	43260839	ENSG00000064601	CTSA	20	44523525	-0.216924	0.0336246	1.10863e-10	3	yes
	ENSG00000163001	CCDC104	2	55759877	ENSG00000248527	MTATP6P1	1	569416	1.25466	0.127189	5.92805e-23	3	no
	ENSG00000212978	AC016747.3	2	61370418	ENSG00000100558	PLEK2	14	67866308	-0.239299	0.0361951	3.80782e-11	3	no
	ENSG00000168899	VAMP5	2	85816033	ENSG00000196505	GDAP2	1	118442145	0.220892	0.0404262	4.65324e-08	6	yes
	ENSG00000168899	VAMP5	2	85816033	ENSG00000143367	TUFT1	1	151534420	-0.230071	0.0400452	9.17679e-09	6	yes
	ENSG00000168899	VAMP5	2	85816033	ENSG00000197965	MPZL1	1	167725792	0.25093	0.0419762	2.26027e-09	5	yes
	ENSG00000168899	VAMP5	2	85816033	ENSG00000115828	QPCT	2	37586091	-0.285109	0.0404664	1.84705e-12	6	yes
	ENSG00000168899	VAMP5	2	85816033	ENSG00000237803	LINC00211	2	38078403	-0.550286	0.0990231	2.74221e-08	6	yes
	ENSG00000168899	VAMP5	2	85816033	ENSG00000225889	AC074289.1	2	64425183	-0.638946	0.107859	3.14361e-09	5	yes
	ENSG00000168899	VAMP5	2	85816033	ENSG00000244617	ASPRV1	2	70188311	-0.350629	0.0449755	6.38942e-15	6	yes
	ENSG00000168899	VAMP5	2	85816033	ENSG00000138411	HECW2	2	197261196	-0.298709	0.0443935	1.71241e-11	6	yes
	ENSG00000168899	VAMP5	2	85816033	ENSG00000196549	MME	3	154821705	0.309873	0.0444282	3.06556e-12	5	yes
	ENSG00000168899	VAMP5	2	85816033	ENSG00000169429	IL8	4	74607828	-0.31913	0.0456824	2.83153e-12	6	yes
	ENSG00000168899	VAMP5	2	85816033	ENSG00000158373	HIST1H2BD	6	26164963	-0.257034	0.0401055	1.46535e-10	6	yes
	ENSG00000168899	VAMP5	2	85816033	ENSG00000197409	HIST1H3D	6	26198294	-0.343751	0.0613235	2.0761e-08	6	yes
	ENSG00000168899	VAMP5	2	85816033	ENSG00000096063	SRPK1	6	35844931	-0.361526	0.0424423	1.62252e-17	5	yes
	ENSG00000168899	VAMP5	2	85816033	ENSG00000012232	EXTL3	8	28535551	0.330425	0.0433965	2.65548e-14	5	yes
	ENSG00000168899	VAMP5	2	85816033	ENSG00000035681	NSMAF	8	59534233	-0.307229	0.0399454	1.45745e-14	6	yes
	ENSG00000168899	VAMP5	2	85816033	ENSG00000129292	PHF20L1	8	133824335	0.232478	0.0400544	6.47297e-09	6	yes
	ENSG00000168899	VAMP5	2	85816033	ENSG00000052749	RRP12	10	99138621	-0.233515	0.0416097	1.99965e-08	5	yes
	ENSG00000168899	VAMP5	2	85816033	ENSG00000072952	MRVI1	11	10655086	-0.32523	0.0413106	3.46836e-15	6	yes
	ENSG00000168899	VAMP5	2	85816033	ENSG00000196668	LINC00173	12	116972775	-0.366935	0.0487526	5.21265e-14	6	yes
	ENSG00000168899	VAMP5	2	85816033	ENSG00000091592	NLRP1	17	5462745	0.218031	0.0399354	4.7722e-08	6	yes
	ENSG00000168899	VAMP5	2	85816033	ENSG00000263874	LINC00672	17	37082865	-0.537099	0.0982771	4.62513e-08	6	yes
	ENSG00000168899	VAMP5	2	85816033	ENSG00000108244	KRT23	17	39086417	-0.316897	0.0447072	1.35797e-12	6	yes
	ENSG00000168899	VAMP5	2	85816033	ENSG00000062716	VMP1	17	57852084	0.258218	0.047067	4.10716e-08	5	yes
	ENSG00000168899	VAMP5	2	85816033	ENSG00000265298	RP13-104F24.3	17	62746983	0.486334	0.0885429	3.95982e-08	5	yes
	ENSG00000168899	VAMP5	2	85816033	ENSG00000178789	CD300LB	17	72522463	-0.26194	0.0431798	1.30913e-09	5	yes
	ENSG00000168899	VAMP5	2	85816033	ENSG00000079385	CEACAM1	19	43038421	-0.36564	0.0427416	1.18202e-17	5	yes
	ENSG00000168890	TMEM150A	2	85827995	ENSG00000115828	QPCT	2	37586091	-0.486443	0.0778752	4.1991e-10	3	yes
	ENSG00000168890	TMEM150A	2	85827995	ENSG00000173559	NABP1	2	192548022	0.474265	0.0853809	2.78089e-08	3	yes
	ENSG00000168890	TMEM150A	2	85827995	ENSG00000138411	HECW2	2	197261196	-0.484146	0.0828067	5.01417e-09	3	yes
	ENSG00000168890	TMEM150A	2	85827995	ENSG00000145491	ROPN1L	5	10456888	-0.527387	0.0901424	4.89796e-09	3	yes
	ENSG00000168890	TMEM150A	2	85827995	ENSG00000158373	HIST1H2BD	6	26164963	-0.475546	0.0763434	4.69317e-10	3	yes
	ENSG00000168890	TMEM150A	2	85827995	ENSG00000112053	SLC26A8	6	35951968	-0.625709	0.081417	1.52711e-14	3	yes
	ENSG00000168890	TMEM150A	2	85827995	ENSG00000178814	OPLAH	8	145112451	-0.628349	0.113929	3.48256e-08	3	yes
	ENSG00000168890	TMEM150A	2	85827995	ENSG00000091592	NLRP1	17	5462745	0.444478	0.0755667	4.05514e-09	3	yes
	ENSG00000168890	TMEM150A	2	85827995	ENSG00000100985	MMP9	20	44641373	-0.549116	0.0861143	1.81067e-10	3	yes
	ENSG00000115523	GNLY	2	85919137	ENSG00000244617	ASPRV1	2	70188311	0.294825	0.0504106	4.96133e-09	7	yes
	ENSG00000115523	GNLY	2	85919137	ENSG00000158373	HIST1H2BD	6	26164963	0.253521	0.0454841	2.49205e-08	7	yes
	ENSG00000115523	GNLY	2	85919137	ENSG00000197409	HIST1H3D	6	26198294	0.392008	0.0674622	6.21845e-09	7	yes
	ENSG00000115523	GNLY	2	85919137	ENSG00000052749	RRP12	10	99138621	0.278381	0.045946	1.37075e-09	7	yes
	ENSG00000115523	GNLY	2	85919137	ENSG00000072952	MRVI1	11	10655086	0.292237	0.0454308	1.25459e-10	7	yes
	ENSG00000115523	GNLY	2	85919137	ENSG00000100697	DICER1	14	95588456	-0.26025	0.0465941	2.33065e-08	7	yes
	ENSG00000115523	GNLY	2	85919137	ENSG00000183576	SETD3	14	99905649	-0.272258	0.0466196	5.22017e-09	7	yes
	ENSG00000115523	GNLY	2	85919137	ENSG00000108244	KRT23	17	39086417	0.28501	0.050449	1.60947e-08	7	yes
	ENSG00000115523	GNLY	2	85919137	ENSG00000167851	CD300A	17	72471744	0.472443	0.0570336	1.1951e-16	6	yes
	ENSG00000168874	ATOH8	2	85996828	ENSG00000118217	ATF6	1	161834972	-0.423525	0.0714237	3.03393e-09	3	yes
	ENSG00000168874	ATOH8	2	85996828	ENSG00000173559	NABP1	2	192548022	-0.573887	0.0858252	2.2826e-11	3	yes
	ENSG00000168874	ATOH8	2	85996828	ENSG00000251259	AC004069.2	4	106060106	-1.45909	0.217897	2.13855e-11	3	yes
	ENSG00000168874	ATOH8	2	85996828	ENSG00000065615	CYB5R4	6	84619754	-0.428439	0.0760721	1.78125e-08	3	yes
	ENSG00000168874	ATOH8	2	85996828	ENSG00000139890	REM2	14	23354634	-0.588487	0.0780994	4.87938e-14	3	yes
	ENSG00000168874	ATOH8	2	85996828	ENSG00000125510	OPRL1	20	62721761	-0.508737	0.074409	8.08537e-12	3	yes
	ENSG00000236525	AC007278.2	2	103051108	ENSG00000115415	STAT1	2	191857385	-0.0792779	0.0133029	2.53127e-09	3	yes
	ENSG00000115607	IL18RAP	2	103052087	ENSG00000115415	STAT1	2	191857385	-0.0741575	0.0116998	2.3221e-10	6	yes
	ENSG00000123636	BAZ2B	2	160324346	ENSG00000142687	KIAA0319L	1	35961321	-0.229051	0.0270099	2.24669e-17	6	yes
	ENSG00000123636	BAZ2B	2	160324346	ENSG00000116991	SIPA1L2	1	232615507	-0.311696	0.027037	9.48014e-31	4	yes
	ENSG00000123636	BAZ2B	2	160324346	ENSG00000183023	SLC8A1	2	40588739	-0.140133	0.0250547	2.2308e-08	6	yes
	ENSG00000123636	BAZ2B	2	160324346	ENSG00000127824	TUBA4A	2	220128662	-0.172473	0.0248975	4.28901e-12	6	yes
	ENSG00000123636	BAZ2B	2	160324346	ENSG00000169223	LMAN2	5	176768708	-0.15517	0.0255658	1.2837e-09	5	yes
	ENSG00000123636	BAZ2B	2	160324346	ENSG00000135604	STX11	6	144490585	-0.161111	0.0248935	9.67104e-11	6	yes
	ENSG00000123636	BAZ2B	2	160324346	ENSG00000146426	TIAM2	6	155366344	-0.236735	0.0265241	4.44659e-19	4	yes
	ENSG00000123636	BAZ2B	2	160324346	ENSG00000012232	EXTL3	8	28535551	-0.164107	0.0262095	3.81595e-10	4	yes
	ENSG00000123636	BAZ2B	2	160324346	ENSG00000136867	SLC31A2	9	115919819	-0.171087	0.0264202	9.44357e-11	4	yes
	ENSG00000123636	BAZ2B	2	160324346	ENSG00000148180	GSN	9	124032599	0.161702	0.0247593	6.53486e-11	6	yes
	ENSG00000123636	BAZ2B	2	160324346	ENSG00000076685	NT5C2	10	104899498	-0.155585	0.0248058	3.56197e-10	6	yes
	ENSG00000123636	BAZ2B	2	160324346	ENSG00000111261	MANSC1	12	12492836	-0.403427	0.0269835	1.53792e-50	5	yes
	ENSG00000123636	BAZ2B	2	160324346	ENSG00000196547	MAN2A2	15	91455631	-0.14817	0.025502	6.24258e-09	5	yes
	ENSG00000123636	BAZ2B	2	160324346	ENSG00000007237	GAS7	17	9957897	-0.200276	0.0257592	7.54731e-15	5	yes
	ENSG00000123636	BAZ2B	2	160324346	ENSG00000167434	CA4	17	58237778	-0.158336	0.0261229	1.35122e-09	4	yes
	ENSG00000123636	BAZ2B	2	160324346	ENSG00000070731	ST6GALNAC2	17	74571415	-0.244703	0.0265012	2.61514e-20	5	yes
	ENSG00000123636	BAZ2B	2	160324346	ENSG00000141401	IMPA2	18	12005950	-0.208528	0.0260761	1.27597e-15	4	yes
	ENSG00000123636	BAZ2B	2	160324346	ENSG00000125810	CD93	20	23063481	-0.278025	0.026168	2.29007e-26	5	yes
	ENSG00000224152	AC009506.1	2	160472700	ENSG00000142687	KIAA0319L	1	35961321	-0.145088	0.0181631	1.37103e-15	5	yes
	ENSG00000224152	AC009506.1	2	160472700	ENSG00000116991	SIPA1L2	1	232615507	-0.201904	0.0194829	3.64753e-25	3	yes
	ENSG00000224152	AC009506.1	2	160472700	ENSG00000127824	TUBA4A	2	220128662	-0.121853	0.0181878	2.08834e-11	4	yes
	ENSG00000224152	AC009506.1	2	160472700	ENSG00000169223	LMAN2	5	176768708	-0.115771	0.0175273	3.97053e-11	4	yes
	ENSG00000224152	AC009506.1	2	160472700	ENSG00000135604	STX11	6	144490585	-0.107063	0.0170907	3.74304e-10	5	yes
	ENSG00000224152	AC009506.1	2	160472700	ENSG00000146426	TIAM2	6	155366344	-0.143553	0.0185211	9.13264e-15	3	yes
	ENSG00000224152	AC009506.1	2	160472700	ENSG00000012232	EXTL3	8	28535551	-0.0972896	0.0175634	3.03644e-08	4	yes
	ENSG00000224152	AC009506.1	2	160472700	ENSG00000148180	GSN	9	124032599	0.102252	0.016663	8.4364e-10	5	yes
	ENSG00000224152	AC009506.1	2	160472700	ENSG00000111261	MANSC1	12	12492836	-0.258948	0.0196153	8.62286e-40	4	yes
	ENSG00000224152	AC009506.1	2	160472700	ENSG00000196547	MAN2A2	15	91455631	-0.0996805	0.0174373	1.08728e-08	4	yes
	ENSG00000224152	AC009506.1	2	160472700	ENSG00000007237	GAS7	17	9957897	-0.11451	0.0172944	3.56353e-11	4	yes
	ENSG00000224152	AC009506.1	2	160472700	ENSG00000167434	CA4	17	58237778	-0.100824	0.0180339	2.26018e-08	3	yes
	ENSG00000224152	AC009506.1	2	160472700	ENSG00000070731	ST6GALNAC2	17	74571415	-0.154135	0.0181112	1.73203e-17	4	yes
	ENSG00000224152	AC009506.1	2	160472700	ENSG00000141401	IMPA2	18	12005950	-0.134141	0.0182081	1.74351e-13	3	yes
	ENSG00000224152	AC009506.1	2	160472700	ENSG00000125810	CD93	20	23063481	-0.168164	0.0178006	3.48196e-21	4	yes
	ENSG00000241399	CD302	2	160640058	ENSG00000169223	LMAN2	5	176768708	0.217543	0.0328926	3.74723e-11	3	yes
	ENSG00000241399	CD302	2	160640058	ENSG00000146426	TIAM2	6	155366344	0.211882	0.0333678	2.15462e-10	3	yes
	ENSG00000115232	ITGA4	2	182361421	ENSG00000163131	CTSS	1	150720492	-0.103475	0.0161399	1.44428e-10	3	yes
	ENSG00000115232	ITGA4	2	182361421	ENSG00000158473	CD1D	1	158152211	-0.108923	0.0160589	1.17935e-11	3	yes
	ENSG00000115232	ITGA4	2	182361421	ENSG00000068724	TTC7A	2	47223286	-0.134668	0.0176294	2.19216e-14	3	yes
	ENSG00000115232	ITGA4	2	182361421	ENSG00000091436	MLTK	2	174036450	-0.0947793	0.0163913	7.36826e-09	3	yes
	ENSG00000115232	ITGA4	2	182361421	ENSG00000093167	LRRFIP2	3	37159648	-0.110135	0.0160469	6.72836e-12	3	yes
	ENSG00000115232	ITGA4	2	182361421	ENSG00000012223	LTF	3	46501930	-0.195101	0.0160716	6.52283e-34	3	yes
	ENSG00000115232	ITGA4	2	182361421	ENSG00000114648	KLHL18	3	47356356	-0.0917071	0.0160504	1.10556e-08	3	yes
	ENSG00000115232	ITGA4	2	182361421	ENSG00000114204	ENSG00000114204	3	167178184	-0.182654	0.0250827	3.2874e-13	3	yes
	ENSG00000115232	ITGA4	2	182361421	ENSG00000173085	COQ2	4	84194378	-0.0896315	0.016075	2.46361e-08	3	yes
	ENSG00000115232	ITGA4	2	182361421	ENSG00000164023	SGMS2	4	108790961	-0.111229	0.0161568	5.80443e-12	3	yes
	ENSG00000115232	ITGA4	2	182361421	ENSG00000164136	IL15	4	142606446	-0.098785	0.0161456	9.45355e-10	3	yes
	ENSG00000115232	ITGA4	2	182361421	ENSG00000164125	FAM198B	4	159070048	-0.1101	0.0160796	7.53397e-12	3	yes
	ENSG00000115232	ITGA4	2	182361421	ENSG00000164124	TMEM144	4	159149659	-0.0889411	0.0160517	3.0088e-08	3	yes
	ENSG00000115232	ITGA4	2	182361421	ENSG00000138829	FBN2	5	127794239	-0.0967793	0.0161299	1.97328e-09	3	yes
	ENSG00000115232	ITGA4	2	182361421	ENSG00000112799	LY86	6	6621778	-0.108145	0.0160449	1.58227e-11	3	yes
	ENSG00000115232	ITGA4	2	182361421	ENSG00000026652	AGPAT4	6	161623052	-0.124892	0.016066	7.62141e-15	3	yes
	ENSG00000115232	ITGA4	2	182361421	ENSG00000106066	CPVL	7	29134957	-0.0991359	0.0160474	6.50421e-10	3	yes
	ENSG00000115232	ITGA4	2	182361421	ENSG00000179869	ABCA13	7	48449073	-0.093474	0.0160974	6.36851e-09	3	yes
	ENSG00000115232	ITGA4	2	182361421	ENSG00000135218	CD36	7	80153742	-0.0953774	0.016053	2.82588e-09	3	yes
	ENSG00000115232	ITGA4	2	182361421	ENSG00000082014	SMARCD3	7	150955416	-0.0933619	0.0161307	7.13037e-09	3	yes
	ENSG00000115232	ITGA4	2	182361421	ENSG00000092964	DPYSL2	8	26443742	-0.157899	0.0160646	8.44962e-23	3	yes
	ENSG00000115232	ITGA4	2	182361421	ENSG00000165092	ALDH1A1	9	75605468	-0.151407	0.0161036	5.34991e-21	3	yes
	ENSG00000115232	ITGA4	2	182361421	ENSG00000135046	ANXA1	9	75775991	-0.124859	0.0160992	8.79117e-15	3	yes
	ENSG00000115232	ITGA4	2	182361421	ENSG00000213694	S1PR3	9	91613143	-0.0998433	0.0175243	1.21631e-08	3	yes
	ENSG00000115232	ITGA4	2	182361421	ENSG00000119457	SLC46A2	9	115647196	-0.124743	0.0161231	1.01852e-14	3	yes
	ENSG00000115232	ITGA4	2	182361421	ENSG00000148346	LCN2	9	130913542	-0.252582	0.0240216	7.38774e-26	3	yes
	ENSG00000115232	ITGA4	2	182361421	ENSG00000026025	VIM	10	17274925	-0.152056	0.0239829	2.29458e-10	3	yes
	ENSG00000115232	ITGA4	2	182361421	ENSG00000148655	C10orf11	10	77755568	-0.0967969	0.0175205	3.29884e-08	3	yes
	ENSG00000115232	ITGA4	2	182361421	ENSG00000187164	KIAA1598	10	118764919	-0.0943073	0.0160487	4.19484e-09	3	yes
	ENSG00000115232	ITGA4	2	182361421	ENSG00000026508	CD44	11	35207183	-0.130838	0.0161175	4.74879e-16	3	yes
	ENSG00000115232	ITGA4	2	182361421	ENSG00000166927	MS4A7	11	60154689	-0.10116	0.0161109	3.40786e-10	3	yes
	ENSG00000115232	ITGA4	2	182361421	ENSG00000166928	MS4A14	11	60165582	-0.154995	0.0175519	1.04038e-18	3	yes
	ENSG00000115232	ITGA4	2	182361421	ENSG00000124942	AHNAK	11	62262361	-0.122186	0.0162081	4.75167e-14	3	yes
	ENSG00000115232	ITGA4	2	182361421	ENSG00000084207	GSTP1	11	67352598	-0.106311	0.0160559	3.56122e-11	3	yes
	ENSG00000115232	ITGA4	2	182361421	ENSG00000006534	ALDH3B1	11	67786396	-0.0887718	0.0161047	3.54404e-08	3	yes
	ENSG00000115232	ITGA4	2	182361421	ENSG00000118113	MMP8	11	102590153	-0.152101	0.0164395	2.20013e-20	3	yes
	ENSG00000115232	ITGA4	2	182361421	ENSG00000184232	OAF	11	120091258	-0.141881	0.0160758	1.08688e-18	3	yes
	ENSG00000115232	ITGA4	2	182361421	ENSG00000121316	PLBD1	12	14688939	-0.110994	0.0175981	2.84202e-10	3	yes
	ENSG00000115232	ITGA4	2	182361421	ENSG00000139117	CPNE8	12	39170928	-0.124987	0.0162466	1.43613e-14	3	yes
	ENSG00000115232	ITGA4	2	182361421	ENSG00000161642	ZNF385A	12	54773999	-0.132088	0.0160443	1.83018e-16	3	yes
	ENSG00000115232	ITGA4	2	182361421	ENSG00000123384	LRP1	12	57564705	-0.098842	0.0161419	9.16569e-10	3	yes
	ENSG00000115232	ITGA4	2	182361421	ENSG00000102837	OLFM4	13	53614513	-0.116933	0.0161447	4.39586e-13	3	yes
	ENSG00000115232	ITGA4	2	182361421	ENSG00000214274	ANG	14	21159733	-0.088342	0.0160503	3.71151e-08	3	yes
	ENSG00000115232	ITGA4	2	182361421	ENSG00000155465	SLC7A7	14	23270730	-0.1445	0.0162358	5.58097e-19	3	yes
	ENSG00000115232	ITGA4	2	182361421	ENSG00000187446	CHP1	15	41548540	-0.104916	0.0178286	3.9886e-09	3	yes
	ENSG00000115232	ITGA4	2	182361421	ENSG00000172183	ISG20	15	89189549	0.091432	0.0162957	2.01399e-08	3	yes
	ENSG00000115232	ITGA4	2	182361421	ENSG00000159713	TPPP3	16	67425575	-0.108806	0.0160525	1.21731e-11	3	yes
	ENSG00000115232	ITGA4	2	182361421	ENSG00000159714	ZDHHC1	16	67439529	-0.114726	0.0161121	1.07548e-12	3	yes
	ENSG00000115232	ITGA4	2	182361421	ENSG00000140836	ZFHX3	16	72955190	-0.136811	0.0161334	2.25289e-17	3	yes
	ENSG00000115232	ITGA4	2	182361421	ENSG00000153786	ZDHHC7	16	85026464	-0.101103	0.0160533	3.01645e-10	3	yes
	ENSG00000115232	ITGA4	2	182361421	ENSG00000141505	ASGR1	17	7079816	-0.121988	0.0160659	3.12665e-14	3	yes
	ENSG00000115232	ITGA4	2	182361421	ENSG00000007237	GAS7	17	9957897	-0.132025	0.0161297	2.71837e-16	3	yes
	ENSG00000115232	ITGA4	2	182361421	ENSG00000121064	SCPEP1	17	55069797	-0.141635	0.0160661	1.18845e-18	3	yes
	ENSG00000115232	ITGA4	2	182361421	ENSG00000226137	BAIAP2-AS1	17	79005717	-0.115294	0.019247	2.09537e-09	3	yes
	ENSG00000115232	ITGA4	2	182361421	ENSG00000104918	RETN	19	7734632	-0.102954	0.0160516	1.41789e-10	3	yes
	ENSG00000115232	ITGA4	2	182361421	ENSG00000105518	TMEM205	19	11455323	-0.0878879	0.0160498	4.352e-08	3	yes
	ENSG00000115232	ITGA4	2	182361421	ENSG00000130304	SLC27A1	19	17598277	-0.0984611	0.0161193	1.0072e-09	3	yes
	ENSG00000115232	ITGA4	2	182361421	ENSG00000124469	CEACAM8	19	43091800	-0.143337	0.0161211	6.04103e-19	3	yes
	ENSG00000115232	ITGA4	2	182361421	ENSG00000093072	CECR1	22	17681536	-0.0993049	0.0161657	8.10173e-10	3	yes
	ENSG00000115232	ITGA4	2	182361421	ENSG00000100079	LGALS2	22	37972439	-0.132854	0.0160789	1.42478e-16	3	yes
	ENSG00000115232	ITGA4	2	182361421	ENSG00000100097	LGALS1	22	38073714	-0.0981207	0.0160471	9.6828e-10	3	yes
	ENSG00000115232	ITGA4	2	182361421	ENSG00000198951	NAGA	22	42460602	-0.0958586	0.0161901	3.20317e-09	3	yes
	ENSG00000115232	ITGA4	2	182361421	ENSG00000100300	TSPO	22	43553384	-0.0955203	0.016185	3.59593e-09	3	yes
	ENSG00000188452	CERKL	2	182473397	ENSG00000163131	CTSS	1	150720492	-0.236059	0.0395241	2.33618e-09	3	yes
	ENSG00000188452	CERKL	2	182473397	ENSG00000197747	S100A10	1	151961128	-0.349921	0.0404856	5.47093e-18	3	yes
	ENSG00000188452	CERKL	2	182473397	ENSG00000068724	TTC7A	2	47223286	-0.341813	0.0453952	5.08486e-14	3	yes
	ENSG00000188452	CERKL	2	182473397	ENSG00000115919	KYNU	2	143717478	-0.248865	0.0399871	4.85778e-10	3	yes
	ENSG00000188452	CERKL	2	182473397	ENSG00000091436	MLTK	2	174036450	-0.232359	0.0412991	1.84164e-08	3	yes
	ENSG00000188452	CERKL	2	182473397	ENSG00000093167	LRRFIP2	3	37159648	-0.273436	0.0399061	7.28361e-12	3	yes
	ENSG00000188452	CERKL	2	182473397	ENSG00000114204	ENSG00000114204	3	167178184	-0.461807	0.0636228	3.91384e-13	3	yes
	ENSG00000188452	CERKL	2	182473397	ENSG00000164023	SGMS2	4	108790961	-0.286295	0.0406995	2.00171e-12	3	yes
	ENSG00000188452	CERKL	2	182473397	ENSG00000109436	TBC1D9	4	141609596	-0.253609	0.0439234	7.74657e-09	3	yes
	ENSG00000188452	CERKL	2	182473397	ENSG00000164125	FAM198B	4	159070048	-0.255803	0.0399963	1.59847e-10	3	yes
	ENSG00000188452	CERKL	2	182473397	ENSG00000170458	CD14	5	140012299	-0.27164	0.0398183	8.97818e-12	3	yes
	ENSG00000188452	CERKL	2	182473397	ENSG00000112799	LY86	6	6621778	-0.255307	0.0394704	9.91008e-11	3	yes
	ENSG00000188452	CERKL	2	182473397	ENSG00000026652	AGPAT4	6	161623052	-0.301898	0.0395789	2.38866e-14	3	yes
	ENSG00000188452	CERKL	2	182473397	ENSG00000106066	CPVL	7	29134957	-0.241175	0.0396516	1.18432e-09	3	yes
	ENSG00000188452	CERKL	2	182473397	ENSG00000082014	SMARCD3	7	150955416	-0.229247	0.0401831	1.16307e-08	3	yes
	ENSG00000188452	CERKL	2	182473397	ENSG00000135046	ANXA1	9	75775991	-0.311748	0.0407776	2.08805e-14	3	yes
	ENSG00000188452	CERKL	2	182473397	ENSG00000119457	SLC46A2	9	115647196	-0.319077	0.0405118	3.37611e-15	3	yes
	ENSG00000188452	CERKL	2	182473397	ENSG00000085265	FCN1	9	137805620	-0.259627	0.0404517	1.37895e-10	3	yes
	ENSG00000188452	CERKL	2	182473397	ENSG00000026025	VIM	10	17274925	-0.413963	0.0608612	1.03356e-11	3	yes
	ENSG00000188452	CERKL	2	182473397	ENSG00000107551	RASSF4	10	45472513	-0.259208	0.0393956	4.71668e-11	3	yes
	ENSG00000188452	CERKL	2	182473397	ENSG00000148655	C10orf11	10	77755568	-0.248834	0.0436406	1.18474e-08	3	yes
	ENSG00000188452	CERKL	2	182473397	ENSG00000026508	CD44	11	35207183	-0.347877	0.042037	1.27916e-16	3	yes
	ENSG00000188452	CERKL	2	182473397	ENSG00000166927	MS4A7	11	60154689	-0.238331	0.0398454	2.21241e-09	3	yes
	ENSG00000188452	CERKL	2	182473397	ENSG00000166928	MS4A14	11	60165582	-0.383324	0.0442268	4.42781e-18	3	yes
	ENSG00000188452	CERKL	2	182473397	ENSG00000124942	AHNAK	11	62262361	-0.313558	0.0418868	7.10972e-14	3	yes
	ENSG00000188452	CERKL	2	182473397	ENSG00000084207	GSTP1	11	67352598	-0.242054	0.0395778	9.60021e-10	3	yes
	ENSG00000188452	CERKL	2	182473397	ENSG00000184232	OAF	11	120091258	-0.347192	0.0398206	2.80901e-18	3	yes
	ENSG00000188452	CERKL	2	182473397	ENSG00000121316	PLBD1	12	14688939	-0.255236	0.0433866	4.03271e-09	3	yes
	ENSG00000188452	CERKL	2	182473397	ENSG00000139117	CPNE8	12	39170928	-0.28056	0.0397657	1.72187e-12	3	yes
	ENSG00000188452	CERKL	2	182473397	ENSG00000161642	ZNF385A	12	54773999	-0.323072	0.0407557	2.24445e-15	3	yes
	ENSG00000188452	CERKL	2	182473397	ENSG00000123384	LRP1	12	57564705	-0.224073	0.0398163	1.82675e-08	3	yes
	ENSG00000188452	CERKL	2	182473397	ENSG00000155465	SLC7A7	14	23270730	-0.334784	0.0401115	7.04164e-17	3	yes
	ENSG00000188452	CERKL	2	182473397	ENSG00000187446	CHP1	15	41548540	-0.241306	0.0438028	3.61042e-08	3	yes
	ENSG00000188452	CERKL	2	182473397	ENSG00000104093	DMXL2	15	51827469	-0.226189	0.0406151	2.56086e-08	3	yes
	ENSG00000188452	CERKL	2	182473397	ENSG00000172183	ISG20	15	89189549	0.224525	0.0404029	2.74223e-08	3	yes
	ENSG00000188452	CERKL	2	182473397	ENSG00000159713	TPPP3	16	67425575	-0.27047	0.0410328	4.3526e-11	3	yes
	ENSG00000188452	CERKL	2	182473397	ENSG00000140836	ZFHX3	16	72955190	-0.357265	0.0416877	1.03448e-17	3	yes
	ENSG00000188452	CERKL	2	182473397	ENSG00000153786	ZDHHC7	16	85026464	-0.256937	0.0410218	3.76632e-10	3	yes
	ENSG00000188452	CERKL	2	182473397	ENSG00000141505	ASGR1	17	7079816	-0.295168	0.0401055	1.84191e-13	3	yes
	ENSG00000188452	CERKL	2	182473397	ENSG00000007237	GAS7	17	9957897	-0.297505	0.0396477	6.20325e-14	3	yes
	ENSG00000188452	CERKL	2	182473397	ENSG00000226137	BAIAP2-AS1	17	79005717	-0.284598	0.0477517	2.523e-09	3	yes
	ENSG00000188452	CERKL	2	182473397	ENSG00000176014	TUBB6	18	12325993	-0.226417	0.0396931	1.16901e-08	3	yes
	ENSG00000188452	CERKL	2	182473397	ENSG00000130304	SLC27A1	19	17598277	-0.217576	0.0393885	3.31664e-08	3	yes
	ENSG00000188452	CERKL	2	182473397	ENSG00000093072	CECR1	22	17681536	-0.253552	0.0409526	5.96472e-10	3	yes
	ENSG00000188452	CERKL	2	182473397	ENSG00000100079	LGALS2	22	37972439	-0.340386	0.041345	1.82881e-16	3	yes
	ENSG00000188452	CERKL	2	182473397	ENSG00000198951	NAGA	22	42460602	-0.216545	0.0395875	4.49966e-08	3	yes
	ENSG00000138449	SLC40A1	2	190436894	ENSG00000109107	ALDOC	17	26902207	0.133735	0.01857	5.94695e-13	6	yes
	ENSG00000127831	VIL1	2	219300916	ENSG00000158373	HIST1H2BD	6	26164963	-0.141999	0.0210779	1.61837e-11	5	yes
	ENSG00000115568	ZNF142	2	219513508	ENSG00000197903	HIST1H2BK	6	27110346	0.22795	0.0369769	7.06338e-10	3	yes
	ENSG00000115568	ZNF142	2	219513508	ENSG00000136098	NEK3	13	52720385	-0.544207	0.0388924	1.72917e-44	3	yes
	ENSG00000115568	ZNF142	2	219513508	ENSG00000125648	SLC25A23	19	6450652	0.353499	0.0599096	3.62324e-09	3	yes
	ENSG00000115568	ZNF142	2	219513508	ENSG00000125648	SLC25A23	19	6450652	0.353499	0.0599096	3.62324e-09	3	yes
	ENSG00000135912	TTLL4	2	219597853	ENSG00000197903	HIST1H2BK	6	27110346	0.245274	0.0342362	7.82594e-13	5	yes
	ENSG00000135929	CYP27A1	2	219663244	ENSG00000158373	HIST1H2BD	6	26164963	0.0569657	0.00881106	1.01133e-10	23	yes
	ENSG00000135929	CYP27A1	2	219663244	ENSG00000216331	HIST1H1PS1	6	26195896	0.121492	0.0220126	3.40594e-08	23	yes
	ENSG00000135929	CYP27A1	2	219663244	ENSG00000197409	HIST1H3D	6	26198294	0.108442	0.0130567	9.94454e-17	23	yes
	ENSG00000135929	CYP27A1	2	219663244	ENSG00000197903	HIST1H2BK	6	27110346	0.0564288	0.00882444	1.60964e-10	22	yes
	ENSG00000135929	CYP27A1	2	219663244	ENSG00000136098	NEK3	13	52720385	-0.130337	0.00896944	7.68404e-48	20	yes
	ENSG00000168395	ING5	2	242655171	ENSG00000163735	CXCL5	4	74862927	0.119265	0.0208853	1.12664e-08	3	yes
	ENSG00000168395	ING5	2	242655171	ENSG00000172159	FRMD3	9	86005683	-0.145119	0.0208303	3.24344e-12	3	yes
	ENSG00000168395	ING5	2	242655171	ENSG00000102804	TSC22D1	13	45079469	-0.131766	0.0211954	5.07682e-10	3	yes
	ENSG00000163508	EOMES	3	27760823	ENSG00000176083	ZNF683	1	26694569	-0.845058	0.0553504	1.26075e-52	5	yes
	ENSG00000163508	EOMES	3	27760823	ENSG00000162777	DENND2D	1	111738476	0.360725	0.0435304	1.16397e-16	6	yes
	ENSG00000163508	EOMES	3	27760823	ENSG00000133067	LGR6	1	202225969	0.380672	0.0459679	1.21881e-16	5	yes
	ENSG00000163508	EOMES	3	27760823	ENSG00000172215	CXCR6	3	45986135	0.302209	0.035137	7.91027e-18	7	yes
	ENSG00000163508	EOMES	3	27760823	ENSG00000113088	GZMK	5	54325239	0.329656	0.0344434	1.05909e-21	7	yes
	ENSG00000163508	EOMES	3	27760823	ENSG00000157111	TMEM171	5	72421881	0.390597	0.0433695	2.13229e-19	6	yes
	ENSG00000163508	EOMES	3	27760823	ENSG00000124507	PACSIN1	6	34468461	0.367442	0.0489771	6.26982e-14	4	yes
	ENSG00000163508	EOMES	3	27760823	ENSG00000008256	CYTH3	7	6256841	0.220366	0.0335257	4.92993e-11	7	yes
	ENSG00000163508	EOMES	3	27760823	ENSG00000066923	STAG3	7	99797148	0.230788	0.0345414	2.3653e-11	7	yes
	ENSG00000168329	CX3CR1	3	39314105	ENSG00000135047	CTSL	9	90343371	0.583934	0.085248	7.39415e-12	4	no
	ENSG00000168329	CX3CR1	3	39314105	ENSG00000138166	DUSP5	10	112264449	0.487411	0.0777808	3.69336e-10	4	no
	ENSG00000168329	CX3CR1	3	39314105	ENSG00000148737	TCF7L2	10	114818723	0.512823	0.0798977	1.37628e-10	4	no
	ENSG00000168329	CX3CR1	3	39314105	ENSG00000126003	PLAGL2	20	30787950	0.634143	0.0863738	2.10666e-13	4	no
	ENSG00000172215	CXCR6	3	45986135	ENSG00000171735	CAMTA1	1	7337575	0.238154	0.0355521	2.10251e-11	7	yes
	ENSG00000172215	CXCR6	3	45986135	ENSG00000162594	ENSG00000162594	1	67678872	0.315592	0.0361181	2.3773e-18	7	yes
	ENSG00000172215	CXCR6	3	45986135	ENSG00000143365	RORC	1	151791447	0.460774	0.0367994	5.71443e-36	7	yes
	ENSG00000172215	CXCR6	3	45986135	ENSG00000162630	B3GALT2	1	193151979	0.237318	0.0351269	1.41831e-11	7	yes
	ENSG00000172215	CXCR6	3	45986135	ENSG00000168280	KIF5C	2	149758046	0.30005	0.0360325	8.27826e-17	7	yes
	ENSG00000172215	CXCR6	3	45986135	ENSG00000144290	SLC4A10	2	162561317	0.294668	0.0361518	3.61383e-16	7	yes
	ENSG00000172215	CXCR6	3	45986135	ENSG00000197635	DPP4	2	162889901	0.332494	0.0380694	2.46065e-18	6	yes
	ENSG00000172215	CXCR6	3	45986135	ENSG00000157985	AGAP1	2	236718965	0.197797	0.0350958	1.74134e-08	7	yes
	ENSG00000172215	CXCR6	3	45986135	ENSG00000206561	COLQ	3	15527449	0.326484	0.0396132	1.69669e-16	5	yes
	ENSG00000172215	CXCR6	3	45986135	ENSG00000113088	GZMK	5	54325239	0.417529	0.0399647	1.5049e-25	6	yes
	ENSG00000172215	CXCR6	3	45986135	ENSG00000157111	TMEM171	5	72421881	0.230927	0.0365573	2.66951e-10	6	yes
	ENSG00000172215	CXCR6	3	45986135	ENSG00000118402	ELOVL4	6	80640913	0.277176	0.0357167	8.46514e-15	7	yes
	ENSG00000172215	CXCR6	3	45986135	ENSG00000146250	ENSG00000146250	6	84228808	0.255765	0.0357946	8.97634e-13	7	yes
	ENSG00000172215	CXCR6	3	45986135	ENSG00000112419	PHACTR2	6	144005152	0.221189	0.0362164	1.01248e-09	6	yes
	ENSG00000172215	CXCR6	3	45986135	ENSG00000112486	CCR6	6	167539239	0.211705	0.0352625	1.92881e-09	7	yes
	ENSG00000172215	CXCR6	3	45986135	ENSG00000008256	CYTH3	7	6256841	0.26557	0.0367021	4.62669e-13	6	yes
	ENSG00000172215	CXCR6	3	45986135	ENSG00000085563	ABCB1	7	87237893	0.341318	0.035997	2.49801e-21	7	yes
	ENSG00000172215	CXCR6	3	45986135	ENSG00000152268	SPON1	11	14136780	0.247701	0.0353941	2.58933e-12	7	yes
	ENSG00000172215	CXCR6	3	45986135	ENSG00000137501	SYTL2	11	85463725	0.251556	0.0359584	2.63802e-12	7	yes
	ENSG00000172215	CXCR6	3	45986135	ENSG00000111796	KLRB1	12	9753814	0.450085	0.0392411	1.8724e-30	7	yes
	ENSG00000172215	CXCR6	3	45986135	ENSG00000256553	TRAV1-2	14	22111453	0.412683	0.0439091	5.53044e-21	7	yes
	ENSG00000172215	CXCR6	3	45986135	ENSG00000062524	LTK	15	41800960	0.306965	0.0360689	1.73137e-17	7	yes
	ENSG00000172215	CXCR6	3	45986135	ENSG00000069667	RORA	15	61151000	0.191996	0.0351237	4.59583e-08	7	yes
	ENSG00000172215	CXCR6	3	45986135	ENSG00000008283	CYB561	17	61516702	0.203779	0.0366949	2.8029e-08	6	yes
	ENSG00000172215	CXCR6	3	45986135	ENSG00000119537	KDSR	18	61014851	0.257124	0.0357368	6.24881e-13	7	yes
	ENSG00000183625	CCR3	3	46256646	ENSG00000168280	KIF5C	2	149758046	0.0987089	0.0139382	1.42188e-12	4	yes
	ENSG00000183625	CCR3	3	46256646	ENSG00000062524	LTK	15	41800960	0.0868698	0.0137368	2.55097e-10	5	yes
	ENSG00000121807	CCR2	3	46398822	ENSG00000143365	RORC	1	151791447	-0.290175	0.0488642	2.87814e-09	5	yes
	ENSG00000121807	CCR2	3	46398822	ENSG00000111796	KLRB1	12	9753814	0.150287	0.0264773	1.37825e-08	8	yes
	ENSG00000114650	SCAP	3	47486909	ENSG00000116133	DHCR24	1	55334098	0.155576	0.0262232	2.97863e-09	5	yes
	ENSG00000114650	SCAP	3	47486909	ENSG00000130164	LDLR	19	11222265	0.238959	0.026527	2.09617e-19	5	yes
	ENSG00000182179	UBA7	3	49847009	ENSG00000159588	CCDC17	1	46087722	0.129036	0.0181588	1.19485e-12	3	yes
	ENSG00000182179	UBA7	3	49847009	ENSG00000168679	SLC16A4	1	110919587	0.154833	0.0181298	1.33959e-17	3	yes
	ENSG00000182179	UBA7	3	49847009	ENSG00000143457	GOLPH3L	1	150644165	0.108153	0.018178	2.68734e-09	3	yes
	ENSG00000182179	UBA7	3	49847009	ENSG00000133055	MYBPH	1	203140940	-0.111109	0.0181088	8.48124e-10	3	yes
	ENSG00000182179	UBA7	3	49847009	ENSG00000244617	ASPRV1	2	70188311	-0.15652	0.0198228	2.88149e-15	3	yes
	ENSG00000182179	UBA7	3	49847009	ENSG00000154928	EPHB1	3	134647976	0.0988476	0.0180958	4.6959e-08	3	yes
	ENSG00000182179	UBA7	3	49847009	ENSG00000174123	TLR10	4	38779235	0.102967	0.0181157	1.31694e-08	3	yes
	ENSG00000182179	UBA7	3	49847009	ENSG00000242154	RP4-778K6.3	7	104945906	-0.289814	0.0505638	9.94616e-09	3	yes
	ENSG00000182179	UBA7	3	49847009	ENSG00000147459	DOCK5	8	25158918	-0.149242	0.0181829	2.25278e-16	3	yes
	ENSG00000182179	UBA7	3	49847009	ENSG00000127084	FGD3	9	95754125	-0.116024	0.0181178	1.51513e-10	3	yes
	ENSG00000182179	UBA7	3	49847009	ENSG00000214688	C10orf105	10	73484519	-0.151749	0.0240369	2.73428e-10	3	yes
	ENSG00000182179	UBA7	3	49847009	ENSG00000110330	BIRC2	11	102233671	0.106052	0.0181105	4.74614e-09	3	yes
	ENSG00000182179	UBA7	3	49847009	ENSG00000135407	AVIL	12	58201823	0.157468	0.0269331	5.01616e-09	3	yes
	ENSG00000182179	UBA7	3	49847009	ENSG00000141096	DPEP3	16	68012149	-0.194467	0.0183494	3.04485e-26	3	yes
	ENSG00000182179	UBA7	3	49847009	ENSG00000105656	ELL	19	18593205	-0.10831	0.0181178	2.25752e-09	3	yes
	ENSG00000182179	UBA7	3	49847009	ENSG00000128011	LRFN1	19	39801592	-0.142239	0.0221436	1.33182e-10	3	yes
	ENSG00000182179	UBA7	3	49847009	ENSG00000100228	RAB36	22	23497025	0.162249	0.0182363	5.73418e-19	3	yes
	ENSG00000179348	GATA2	3	128205149	ENSG00000179639	FCER1A	1	159268759	0.631535	0.043561	1.25256e-47	8	yes
	ENSG00000179348	GATA2	3	128205149	ENSG00000158715	SLC45A3	1	205638283	0.687528	0.0445615	1.04874e-53	8	yes
	ENSG00000179348	GATA2	3	128205149	ENSG00000143653	SCCPDH	1	246909394	0.400908	0.0399578	1.08823e-23	8	yes
	ENSG00000179348	GATA2	3	128205149	ENSG00000162881	OXER1	2	42990521	0.215367	0.0378615	1.2831e-08	8	yes
	ENSG00000179348	GATA2	3	128205149	ENSG00000116016	EPAS1	2	46567321	0.409559	0.0397442	6.69817e-25	8	yes
	ENSG00000179348	GATA2	3	128205149	ENSG00000163751	CPA3	3	148599013	0.805523	0.0480403	4.2085e-63	8	yes
	ENSG00000179348	GATA2	3	128205149	ENSG00000113520	IL4	5	132014023	0.418122	0.0403894	4.08666e-25	8	yes
	ENSG00000179348	GATA2	3	128205149	ENSG00000154269	ENPP3	6	132009067	0.588777	0.0443562	3.28358e-40	8	yes
	ENSG00000179348	GATA2	3	128205149	ENSG00000131016	AKAP12	6	151620413	0.541304	0.0418293	2.64947e-38	8	yes
	ENSG00000179348	GATA2	3	128205149	ENSG00000134827	TCN1	11	59627160	0.490218	0.0690316	1.2353e-12	7	yes
	ENSG00000179348	GATA2	3	128205149	ENSG00000149516	MS4A3	11	59831330	0.633806	0.0511885	3.27836e-35	8	yes
	ENSG00000179348	GATA2	3	128205149	ENSG00000149534	MS4A2	11	59859589	0.797621	0.0735813	2.22505e-27	7	yes
	ENSG00000179348	GATA2	3	128205149	ENSG00000140287	HDC	15	50546201	0.895773	0.0648138	1.9116e-43	6	yes
	ENSG00000179348	GATA2	3	128205149	ENSG00000005189	AC004381.6	16	20839369	0.282649	0.0395988	9.48187e-13	8	yes
	ENSG00000179348	GATA2	3	128205149	ENSG00000141447	OSBPL1A	18	21859926	0.378806	0.0393007	5.48998e-22	8	yes
	ENSG00000179348	GATA2	3	128205149	ENSG00000134489	HRH4	18	22050257	0.322829	0.0388639	9.84392e-17	8	yes
	ENSG00000179348	GATA2	3	128205149	ENSG00000267453	AC004791.2	19	15969268	0.569849	0.0575852	4.34378e-23	8	yes
	ENSG00000179348	GATA2	3	128205149	ENSG00000105205	CLC	19	40225279	0.499725	0.0417356	4.886e-33	8	yes
	ENSG00000179348	GATA2	3	128205149	ENSG00000130433	CACNG6	19	54505732	0.511673	0.0442062	5.53656e-31	7	yes
	ENSG00000114770	ABCC5	3	183686762	ENSG00000083814	ZNF671	19	58235055	-0.0729726	0.0125706	6.43611e-09	5	no
	ENSG00000113916	BCL6	3	187451340	ENSG00000137496	IL18BP	11	71713174	-0.409335	0.0614413	2.69748e-11	3	no
	ENSG00000113916	BCL6	3	187451340	ENSG00000089486	CDIP1	16	4574752	-0.437832	0.0698519	3.65712e-10	3	no
	ENSG00000145214	DGKQ	4	966679	ENSG00000132465	IGJ	4	71534396	-0.0730063	0.0132593	3.67014e-08	5	no
	ENSG00000127418	FGFRL1	4	1012204	ENSG00000095932	C19orf77	19	3477472	0.568113	0.0851458	2.51925e-11	3	yes
	ENSG00000163945	UVSSA	4	1361445	ENSG00000095932	C19orf77	19	3477472	-0.424237	0.0518829	2.91465e-16	5	yes
	ENSG00000231160	RP11-617D20.1	4	38640413	ENSG00000130656	HBZ	16	203594	0.148257	0.0204113	3.77341e-13	3	yes
	ENSG00000231160	RP11-617D20.1	4	38640413	ENSG00000095932	C19orf77	19	3477472	0.118427	0.0216315	4.38162e-08	3	yes
	ENSG00000196355	AC021860.1	4	38647229	ENSG00000130656	HBZ	16	203594	0.0904565	0.0131813	6.76736e-12	3	yes
	ENSG00000196355	AC021860.1	4	38647229	ENSG00000095932	C19orf77	19	3477472	0.0793981	0.0138595	1.01159e-08	3	yes
	ENSG00000109320	NFKB1	4	103480472	ENSG00000117643	MAN1C1	1	26028328	0.369456	0.0669659	3.44683e-08	3	yes
	ENSG00000109320	NFKB1	4	103480472	ENSG00000163568	AIM2	1	159074580	-0.373625	0.0613401	1.12185e-09	3	yes
	ENSG00000109320	NFKB1	4	103480472	ENSG00000162769	FLVCR1	1	213052151	0.721211	0.0716761	8.12601e-24	3	yes
	ENSG00000109320	NFKB1	4	103480472	ENSG00000018280	SLC11A1	2	219254184	-0.339483	0.0605857	2.10238e-08	3	yes
	ENSG00000109320	NFKB1	4	103480472	ENSG00000135925	WNT10A	2	219754694	-0.448218	0.0586406	2.11448e-14	3	yes
	ENSG00000109320	NFKB1	4	103480472	ENSG00000135916	ITM2C	2	231736658	-0.33483	0.058827	1.25733e-08	3	yes
	ENSG00000109320	NFKB1	4	103480472	ENSG00000174944	P2RY14	3	150963080	0.409241	0.0621514	4.56145e-11	3	yes
	ENSG00000109320	NFKB1	4	103480472	ENSG00000170006	TMEM154	4	153570550	0.5205	0.0631107	1.61851e-16	3	yes
	ENSG00000109320	NFKB1	4	103480472	ENSG00000134352	IL6ST	5	55260872	0.359835	0.0593598	1.34493e-09	3	yes
	ENSG00000109320	NFKB1	4	103480472	ENSG00000164512	ANKRD55	5	55462346	0.515668	0.0600704	9.1313e-18	3	yes
	ENSG00000109320	NFKB1	4	103480472	ENSG00000146021	KLHL3	5	137012484	0.346596	0.0609729	1.31259e-08	3	yes
	ENSG00000109320	NFKB1	4	103480472	ENSG00000120318	ARAP3	5	141047378	0.598322	0.0651151	3.97684e-20	3	yes
	ENSG00000109320	NFKB1	4	103480472	ENSG00000135083	CCNJL	5	159725531	-0.377794	0.0616349	8.81271e-10	3	yes
	ENSG00000109320	NFKB1	4	103480472	ENSG00000111837	MAK	6	10800860	0.38709	0.0608416	1.98807e-10	3	yes
	ENSG00000109320	NFKB1	4	103480472	ENSG00000154359	LONRF1	8	12596492	0.413951	0.0591491	2.58841e-12	3	yes
	ENSG00000109320	NFKB1	4	103480472	ENSG00000148180	GSN	9	124032599	0.530968	0.064518	1.87593e-16	3	yes
	ENSG00000109320	NFKB1	4	103480472	ENSG00000150054	MPP7	10	28481668	0.493019	0.0900743	4.41301e-08	3	yes
	ENSG00000109320	NFKB1	4	103480472	ENSG00000099204	ABLIM1	10	116317817	0.376723	0.0619416	1.18757e-09	3	yes
	ENSG00000109320	NFKB1	4	103480472	ENSG00000151929	BAG3	10	121424106	0.321986	0.0582992	3.33279e-08	3	yes
	ENSG00000109320	NFKB1	4	103480472	ENSG00000256862	RP11-664D1.1	12	4000202	0.44756	0.0721229	5.45163e-10	3	yes
	ENSG00000109320	NFKB1	4	103480472	ENSG00000111796	KLRB1	12	9753814	-0.339305	0.0615685	3.56769e-08	3	yes
	ENSG00000109320	NFKB1	4	103480472	ENSG00000184613	NELL2	12	45108844	-0.700587	0.0618883	1.04236e-29	3	yes
	ENSG00000109320	NFKB1	4	103480472	ENSG00000110931	CAMKK2	12	121705804	0.346301	0.0608813	1.28432e-08	3	yes
	ENSG00000109320	NFKB1	4	103480472	ENSG00000103642	LACTB	15	63424129	0.398798	0.0616496	9.87966e-11	3	yes
	ENSG00000109320	NFKB1	4	103480472	ENSG00000140968	IRF8	16	85944312	-0.393092	0.0620296	2.34033e-10	3	yes
	ENSG00000109320	NFKB1	4	103480472	ENSG00000173801	JUP	17	39859437	0.354511	0.0579468	9.48375e-10	3	yes
	ENSG00000109320	NFKB1	4	103480472	ENSG00000005102	MEOX1	17	41728539	0.342111	0.0605979	1.64619e-08	3	yes
	ENSG00000109320	NFKB1	4	103480472	ENSG00000186074	CD300LF	17	72699784	-0.336983	0.0608076	2.99392e-08	3	yes
	ENSG00000109320	NFKB1	4	103480472	ENSG00000170190	SLC16A5	17	73093039	-0.35208	0.0596747	3.63548e-09	3	yes
	ENSG00000109320	NFKB1	4	103480472	ENSG00000134765	DSC1	18	28726009	0.518938	0.064204	6.3378e-16	3	yes
	ENSG00000109320	NFKB1	4	103480472	ENSG00000196628	TCF4	18	53110790	-0.347161	0.0611147	1.34314e-08	3	yes
	ENSG00000109320	NFKB1	4	103480472	ENSG00000196628	TCF4	18	53110790	-0.347161	0.0611147	1.34314e-08	3	yes
	ENSG00000109320	NFKB1	4	103480472	ENSG00000122490	PQLC1	18	77687042	0.339396	0.0579668	4.77006e-09	3	yes
	ENSG00000109320	NFKB1	4	103480472	ENSG00000011422	PLAUR	19	44162473	0.437755	0.0619789	1.62968e-12	3	yes
	ENSG00000109320	NFKB1	4	103480472	ENSG00000183473	SSTR3	22	37604320	-0.467035	0.0604557	1.11636e-14	3	yes
	ENSG00000197208	SLC22A4	5	131655017	ENSG00000115415	STAT1	2	191857385	-0.127907	0.0198032	1.05476e-10	6	yes
	ENSG00000197208	SLC22A4	5	131655017	ENSG00000099194	SCD	10	102115736	0.184813	0.0200057	2.51079e-20	6	yes
	ENSG00000197208	SLC22A4	5	131655017	ENSG00000103355	PRSS33	16	2835951	0.113966	0.0199285	1.07313e-08	5	yes
	ENSG00000197208	SLC22A4	5	131655017	ENSG00000130164	LDLR	19	11222265	0.144683	0.020076	5.73024e-13	6	yes
	ENSG00000197375	SLC22A5	5	131718375	ENSG00000115415	STAT1	2	191857385	-0.0799755	0.0113897	2.19113e-12	3	yes
	ENSG00000197375	SLC22A5	5	131718375	ENSG00000099194	SCD	10	102115736	0.102818	0.0113847	1.69784e-19	3	yes
	ENSG00000125347	IRF1	5	131821895	ENSG00000140105	WARS	14	100821633	0.733171	0.10056	3.07932e-13	3	yes
	ENSG00000170271	FAXDC2	5	154218431	ENSG00000223609	HBD	11	5255254	-0.165927	0.0200341	1.20919e-16	8	yes
	ENSG00000170271	FAXDC2	5	154218431	ENSG00000149100	EIF3M	11	32616576	-0.105351	0.0192552	4.4667e-08	9	yes
	ENSG00000170271	FAXDC2	5	154218431	ENSG00000050426	LETMD1	12	51447976	-0.113445	0.0192833	4.02758e-09	9	yes
	ENSG00000170271	FAXDC2	5	154218431	ENSG00000206177	HBM	16	210329	-0.207598	0.0230117	1.85686e-19	6	yes
	ENSG00000170271	FAXDC2	5	154218431	ENSG00000169877	AHSP	16	31539654	-0.47677	0.0391686	4.37005e-34	4	yes
	ENSG00000170271	FAXDC2	5	154218431	ENSG00000090013	BLVRB	19	40962721	-0.168397	0.0233466	5.47718e-13	5	yes
	ENSG00000169230	PRELID1	5	176732367	ENSG00000228305	AC016734.2	2	63849637	0.769452	0.0342283	6.517e-112	3	no
	ENSG00000169230	PRELID1	5	176732367	ENSG00000217325	PRELID1P1	6	126965085	1.01588	0.0278896	1.70343e-290	3	no
	ENSG00000161013	MGAT4B	5	179229274	ENSG00000000938	FGR	1	27950181	-0.337941	0.0550815	8.49996e-10	4	yes
	ENSG00000161011	SQSTM1	5	179249233	ENSG00000000938	FGR	1	27950181	0.470641	0.0429169	5.54771e-28	5	yes
	ENSG00000161011	SQSTM1	5	179249233	ENSG00000125538	IL1B	2	113590904	0.795398	0.0638218	1.19108e-35	4	yes
	ENSG00000161011	SQSTM1	5	179249233	ENSG00000131669	NINJ1	9	95890170	0.215714	0.0333635	1.00924e-10	7	yes
	ENSG00000161011	SQSTM1	5	179249233	ENSG00000108179	PPIF	10	81111159	0.204838	0.0348376	4.10784e-09	6	yes
	ENSG00000161011	SQSTM1	5	179249233	ENSG00000139370	SLC15A4	12	129293133	0.292972	0.0386476	3.43965e-14	5	yes
	ENSG00000161011	SQSTM1	5	179249233	ENSG00000124102	PI3	20	43804351	0.603675	0.0432466	2.77681e-44	5	yes
	ENSG00000161011	SQSTM1	5	179249233	ENSG00000124107	SLPI	20	43882042	0.201262	0.0346992	6.62429e-09	6	yes
	ENSG00000168405	CMAHP	6	25149996	ENSG00000253570	RNF5P1	8	38458448	0.726345	0.104422	3.50424e-12	3	yes
	ENSG00000079691	LRRC16A	6	25450032	ENSG00000253570	RNF5P1	8	38458448	-1.24322	0.200222	5.32441e-10	3	yes
	ENSG00000079691	LRRC16A	6	25450032	ENSG00000189060	H1F0	22	38202278	0.444468	0.0743702	2.28097e-09	3	yes
	ENSG00000124564	ENSG00000124564	6	25857904	ENSG00000228653	HNRNPCP7	7	63961655	0.61026	0.110416	3.25872e-08	3	yes
	ENSG00000124564	ENSG00000124564	6	25857904	ENSG00000189060	H1F0	22	38202278	-0.299289	0.0454532	4.56297e-11	3	yes
	ENSG00000187837	HIST1H1C	6	26056333	ENSG00000189060	H1F0	22	38202278	-0.747692	0.0429148	5.5482e-68	5	yes
	ENSG00000180596	HIST1H2BC	6	26119627	ENSG00000189060	H1F0	22	38202278	-1.21477	0.0822155	2.11175e-49	3	yes
	ENSG00000158373	HIST1H2BD	6	26164963	ENSG00000105507	CABP5	19	48540260	0.15148	0.021945	5.10185e-12	10	yes
	ENSG00000197846	HIST1H2BF	6	26200345	ENSG00000189060	H1F0	22	38202278	-0.451402	0.0635376	1.20776e-12	6	yes
	ENSG00000168274	HIST1H2AE	6	26217438	ENSG00000136842	TMOD1	9	100313742	0.254333	0.0276284	3.40143e-20	18	yes
	ENSG00000168274	HIST1H2AE	6	26217438	ENSG00000105507	CABP5	19	48540260	-0.17977	0.0288711	4.76545e-10	16	yes
	ENSG00000186470	BTN3A2	6	26371966	ENSG00000226660	TRBV2	7	142001001	-0.158304	0.0273334	6.97252e-09	6	yes
	ENSG00000186470	BTN3A2	6	26371966	ENSG00000211734	TRBV5-1	7	142020929	-0.193813	0.0273041	1.26288e-12	6	yes
	ENSG00000186470	BTN3A2	6	26371966	ENSG00000253570	RNF5P1	8	38458448	-0.490844	0.0270457	1.31518e-73	6	yes
	ENSG00000186470	BTN3A2	6	26371966	ENSG00000184281	TSSC4	11	2423412	-0.0760127	0.0123839	8.35579e-10	6	yes
	ENSG00000186470	BTN3A2	6	26371966	ENSG00000211785	TRAV12-1	14	22309689	-0.182602	0.0273861	2.59905e-11	6	yes
	ENSG00000186470	BTN3A2	6	26371966	ENSG00000211789	TRAV12-2	14	22356359	-0.174173	0.0270421	1.18821e-10	6	yes
	ENSG00000186470	BTN3A2	6	26371966	ENSG00000211797	TRAV17	14	22466092	0.208333	0.0270343	1.2957e-14	6	yes
	ENSG00000186470	BTN3A2	6	26371966	ENSG00000211801	TRAV21	14	22521044	-0.0781555	0.0141121	3.05609e-08	6	yes
	ENSG00000186470	BTN3A2	6	26371966	ENSG00000211810	TRAV29DV5	14	22631450	-0.155059	0.0273605	1.45103e-08	6	yes
	ENSG00000186470	BTN3A2	6	26371966	ENSG00000211816	TRAV38-1	14	22740148	0.15377	0.0273385	1.8587e-08	6	yes
	ENSG00000186470	BTN3A2	6	26371966	ENSG00000196419	XRCC6	22	42038583	0.0865235	0.0137808	3.41711e-10	6	yes
	ENSG00000124508	BTN2A2	6	26389213	ENSG00000211789	TRAV12-2	14	22356359	0.596562	0.103799	9.06814e-09	3	yes
	ENSG00000196812	ZSCAN16	6	28095099	ENSG00000211734	TRBV5-1	7	142020929	1.06558	0.136046	4.78193e-15	3	yes
	ENSG00000196812	ZSCAN16	6	28095099	ENSG00000184281	TSSC4	11	2423412	0.287318	0.0525667	4.60861e-08	3	yes
	ENSG00000196812	ZSCAN16	6	28095099	ENSG00000211785	TRAV12-1	14	22309689	0.994378	0.128709	1.11151e-14	3	yes
	ENSG00000196812	ZSCAN16	6	28095099	ENSG00000211789	TRAV12-2	14	22356359	0.714341	0.107577	3.13048e-11	3	yes
	ENSG00000196812	ZSCAN16	6	28095099	ENSG00000211797	TRAV17	14	22466092	-0.932687	0.111167	4.86388e-17	3	yes
	ENSG00000196812	ZSCAN16	6	28095099	ENSG00000211801	TRAV21	14	22521044	0.351605	0.0591797	2.82753e-09	3	yes
	ENSG00000196812	ZSCAN16	6	28095099	ENSG00000211810	TRAV29DV5	14	22631450	0.788219	0.131021	1.78791e-09	3	yes
	ENSG00000196812	ZSCAN16	6	28095099	ENSG00000196419	XRCC6	22	42038583	-0.430798	0.063631	1.28557e-11	3	yes
	ENSG00000137185	ZSCAN9	6	28196962	ENSG00000211797	TRAV17	14	22466092	0.382727	0.0612467	4.13225e-10	3	yes
	ENSG00000187626	ZKSCAN4	6	28219706	ENSG00000211785	TRAV12-1	14	22309689	0.726157	0.101346	7.77083e-13	3	yes
	ENSG00000187626	ZKSCAN4	6	28219706	ENSG00000211789	TRAV12-2	14	22356359	0.557644	0.0993659	1.99967e-08	3	yes
	ENSG00000187626	ZKSCAN4	6	28219706	ENSG00000211797	TRAV17	14	22466092	-0.787219	0.100866	5.96819e-15	3	yes
	ENSG00000187626	ZKSCAN4	6	28219706	ENSG00000211801	TRAV21	14	22521044	0.278911	0.0495339	1.79471e-08	3	yes
	ENSG00000187626	ZKSCAN4	6	28219706	ENSG00000211810	TRAV29DV5	14	22631450	0.620837	0.102618	1.44877e-09	3	yes
	ENSG00000187626	ZKSCAN4	6	28219706	ENSG00000196419	XRCC6	22	42038583	-0.339513	0.0501582	1.29815e-11	3	yes
	ENSG00000197062	RP5-874C20.3	6	28240381	ENSG00000211785	TRAV12-1	14	22309689	-0.506877	0.0927757	4.66933e-08	3	yes
	ENSG00000197062	RP5-874C20.3	6	28240381	ENSG00000211797	TRAV17	14	22466092	0.530124	0.0744084	1.04438e-12	3	yes
	ENSG00000197062	RP5-874C20.3	6	28240381	ENSG00000211810	TRAV29DV5	14	22631450	-0.560987	0.0931141	1.69402e-09	3	yes
	ENSG00000030110	BAK1	6	33544174	ENSG00000175730	BAK1P1	20	31277769	-1.6603	0.0390177	0	3	no
	ENSG00000124496	TRERF1	6	42306229	ENSG00000000938	FGR	1	27950181	0.240801	0.036546	4.42844e-11	4	yes
	ENSG00000124496	TRERF1	6	42306229	ENSG00000158769	F11R	1	160986892	0.413682	0.0520347	1.86322e-15	3	yes
	ENSG00000124496	TRERF1	6	42306229	ENSG00000182389	CACNB4	2	152822441	0.678508	0.0585858	5.11786e-31	3	yes
	ENSG00000124496	TRERF1	6	42306229	ENSG00000170448	NFXL1	4	47882955	0.332288	0.0366274	1.16738e-19	5	yes
	ENSG00000124496	TRERF1	6	42306229	ENSG00000093134	VNN3	6	133049915	0.236346	0.0352044	1.89964e-11	5	yes
	ENSG00000124496	TRERF1	6	42306229	ENSG00000140526	ABHD2	15	89688140	0.206875	0.035888	8.19159e-09	4	yes
	ENSG00000124496	TRERF1	6	42306229	ENSG00000007237	GAS7	17	9957897	0.276249	0.046265	2.35779e-09	3	yes
	ENSG00000124496	TRERF1	6	42306229	ENSG00000142512	SIGLEC10	19	51917166	0.979702	0.0920845	1.95902e-26	3	yes
	ENSG00000112182	BACH2	6	90821437	ENSG00000198520	C1orf228	1	45165813	0.293816	0.0444047	3.67128e-11	3	yes
	ENSG00000112182	BACH2	6	90821437	ENSG00000117090	SLAMF1	1	160597487	-0.270553	0.0437036	5.99223e-10	3	yes
	ENSG00000112182	BACH2	6	90821437	ENSG00000119147	C2orf40	2	106687158	-0.243638	0.0446528	4.86242e-08	3	yes
	ENSG00000112182	BACH2	6	90821437	ENSG00000178562	CD28	2	204586877	-0.41063	0.0644551	1.8806e-10	3	yes
	ENSG00000112182	BACH2	6	90821437	ENSG00000183813	CCR4	3	32995453	-0.260698	0.0438752	2.81888e-09	3	yes
	ENSG00000112182	BACH2	6	90821437	ENSG00000174136	RGMB	5	98119350	0.272573	0.0487585	2.26722e-08	3	yes
	ENSG00000112182	BACH2	6	90821437	ENSG00000173114	LRRN3	7	110748286	-0.425702	0.0445709	1.28302e-21	3	yes
	ENSG00000112182	BACH2	6	90821437	ENSG00000156395	ENSG00000156395	10	106712926	0.259551	0.0447927	6.85256e-09	3	yes
	ENSG00000112182	BACH2	6	90821437	ENSG00000238121	LINC00426	13	30932844	-0.479248	0.0622803	1.41471e-14	3	yes
	ENSG00000112182	BACH2	6	90821437	ENSG00000139679	LPAR6	13	48991273	-0.257058	0.0439235	4.84547e-09	3	yes
	ENSG00000112182	BACH2	6	90821437	ENSG00000227051	C14orf132	14	96533039	0.557074	0.0472778	4.7766e-32	3	yes
	ENSG00000112182	BACH2	6	90821437	ENSG00000161381	PLXDC1	17	37265101	0.242279	0.043879	3.36052e-08	3	yes
	ENSG00000112182	BACH2	6	90821437	ENSG00000168646	AXIN2	17	63541223	0.469108	0.0455454	7.06273e-25	3	yes
	ENSG00000112182	BACH2	6	90821437	ENSG00000141556	TBCD	17	80805332	-0.300257	0.0484526	5.75817e-10	3	yes
	ENSG00000112182	BACH2	6	90821437	ENSG00000168234	TTC39C	18	21644155	-0.297696	0.0440667	1.42284e-11	3	yes
	ENSG00000112182	BACH2	6	90821437	ENSG00000090920	FCGBP	19	40397248	-0.275761	0.0455439	1.40563e-09	3	yes
	ENSG00000080546	SESN1	6	109361831	ENSG00000184613	NELL2	12	45108844	-0.118841	0.0204054	5.74603e-09	4	yes
	ENSG00000080546	SESN1	6	109361831	ENSG00000235532	LINC00402	13	74819853	-0.158056	0.0241852	6.35137e-11	4	yes
	ENSG00000080546	SESN1	6	109361831	ENSG00000129270	MMP28	17	34102989	-0.144456	0.0209906	5.90505e-12	4	yes
	ENSG00000080546	SESN1	6	109361831	ENSG00000134765	DSC1	18	28726009	-0.149567	0.0206974	4.96013e-13	4	yes
	ENSG00000080546	SESN1	6	109361831	ENSG00000263417	GTSCR1	18	68307867	-0.143827	0.0233884	7.7732e-10	3	yes
	ENSG00000135535	CD164	6	109695739	ENSG00000180611	MB21D2	3	192575277	0.255906	0.0451831	1.48105e-08	3	yes
	ENSG00000135535	CD164	6	109695739	ENSG00000133687	TMTC1	12	29795732	0.329124	0.0416758	2.85151e-15	3	yes
	ENSG00000135535	CD164	6	109695739	ENSG00000134755	DSC2	18	28664159	0.372891	0.0422563	1.09951e-18	3	yes
	ENSG00000025156	HSF2	6	122737477	ENSG00000163468	CCT3	1	156308211	0.173748	0.0220049	2.88317e-15	3	no
	ENSG00000025156	HSF2	6	122737477	ENSG00000115484	CCT4	2	62105581	0.126628	0.0217553	5.86509e-09	3	no
	ENSG00000025156	HSF2	6	122737477	ENSG00000168439	STIP1	11	63962379	0.158553	0.0224899	1.78987e-12	3	no
	ENSG00000025156	HSF2	6	122737477	ENSG00000120694	HSPH1	13	31723643	0.27065	0.0223091	7.16443e-34	3	no
	ENSG00000025156	HSF2	6	122737477	ENSG00000100591	AHSA1	14	77930015	0.167762	0.0220219	2.5773e-14	3	no
	ENSG00000025156	HSF2	6	122737477	ENSG00000080824	HSP90AA1	14	102576555	0.141576	0.0217908	8.18996e-11	3	no
	ENSG00000025156	HSF2	6	122737477	ENSG00000160953	MUM1	19	1332160	0.14159	0.0221491	1.63137e-10	3	no
	ENSG00000025156	HSF2	6	122737477	ENSG00000130303	BST2	19	17515102	0.138201	0.0220773	3.85324e-10	3	no
	ENSG00000025156	HSF2	6	122737477	ENSG00000159873	CCDC117	22	29176972	0.136758	0.0218192	3.66192e-10	3	no
	ENSG00000164484	TMEM200A	6	130725543	ENSG00000082397	EPB41L3	18	5511541	-0.306454	0.0538739	1.28268e-08	3	yes
	ENSG00000135541	AHI1	6	135711792	ENSG00000182010	RTKN2	10	63985630	0.0855572	0.0105751	5.94414e-16	3	no
	ENSG00000135541	AHI1	6	135711792	ENSG00000255569	TRAV1-1	14	22090355	0.119067	0.0125481	2.33594e-21	3	no
	ENSG00000135541	AHI1	6	135711792	ENSG00000211777	TRAV3	14	22192264	0.12524	0.0123905	5.10621e-24	3	no
	ENSG00000135541	AHI1	6	135711792	ENSG00000211778	TRAV4	14	22204849	0.0859097	0.0124124	4.47555e-12	3	no
	ENSG00000135541	AHI1	6	135711792	ENSG00000211786	TRAV8-2	14	22315061	0.136801	0.02493	4.07908e-08	3	no
	ENSG00000135541	AHI1	6	135711792	ENSG00000211790	TRAV8-4	14	22362911	0.156968	0.0249172	2.98475e-10	3	no
	ENSG00000146592	CREB5	7	28602225	ENSG00000054523	KIF1B	1	10356262	0.130078	0.0152805	1.69992e-17	7	yes
	ENSG00000146592	CREB5	7	28602225	ENSG00000142657	PGD	1	10469425	0.144897	0.0228578	2.31135e-10	6	yes
	ENSG00000146592	CREB5	7	28602225	ENSG00000116685	KIAA2013	1	11983066	0.185879	0.0337899	3.77583e-08	6	yes
	ENSG00000146592	CREB5	7	28602225	ENSG00000083444	PLOD1	1	12014928	0.156878	0.0153658	1.79729e-24	6	yes
	ENSG00000146592	CREB5	7	28602225	ENSG00000116688	MFN2	1	12056904	0.0935135	0.0152744	9.22814e-10	7	yes
	ENSG00000146592	CREB5	7	28602225	ENSG00000117115	PADI2	1	17419602	0.100982	0.0152589	3.64313e-11	7	yes
	ENSG00000146592	CREB5	7	28602225	ENSG00000159339	PADI4	1	17662594	0.13964	0.0155977	3.47286e-19	6	yes
	ENSG00000146592	CREB5	7	28602225	ENSG00000162551	ALPL	1	21870381	0.124991	0.0156439	1.35196e-15	6	yes
	ENSG00000146592	CREB5	7	28602225	ENSG00000000938	FGR	1	27950181	-0.0940671	0.0152868	7.58038e-10	7	yes
	ENSG00000146592	CREB5	7	28602225	ENSG00000169403	PTAFR	1	28497062	-0.124522	0.0153313	4.58329e-16	7	yes
	ENSG00000146592	CREB5	7	28602225	ENSG00000119535	CSF3R	1	36940261	-0.130727	0.0154844	3.10616e-17	6	yes
	ENSG00000146592	CREB5	7	28602225	ENSG00000163874	ZC3H12A	1	37945066	-0.0927669	0.0154065	1.73044e-09	6	yes
	ENSG00000146592	CREB5	7	28602225	ENSG00000131238	PPT1	1	40550877	0.111219	0.015321	3.89186e-13	7	yes
	ENSG00000146592	CREB5	7	28602225	ENSG00000084070	SMAP2	1	40849760	-0.100528	0.015382	6.34197e-11	6	yes
	ENSG00000146592	CREB5	7	28602225	ENSG00000177606	JUN	1	59248125	0.0906754	0.0152875	3.00438e-09	7	yes
	ENSG00000146592	CREB5	7	28602225	ENSG00000079739	PGM1	1	64092431	0.110516	0.0154522	8.54365e-13	6	yes
	ENSG00000146592	CREB5	7	28602225	ENSG00000116729	WLS	1	68631472	0.18402	0.0154961	1.59112e-32	6	yes
	ENSG00000146592	CREB5	7	28602225	ENSG00000097033	SH3GLB1	1	87192063	0.116058	0.0154685	6.24543e-14	6	yes
	ENSG00000146592	CREB5	7	28602225	ENSG00000065243	PKN2	1	89225921	-0.0878061	0.0152947	9.41568e-09	7	yes
	ENSG00000146592	CREB5	7	28602225	ENSG00000121957	GPSM2	1	109445508	0.0997859	0.0166943	2.26966e-09	7	yes
	ENSG00000146592	CREB5	7	28602225	ENSG00000163191	S100A11	1	152012682	0.115703	0.0166189	3.3511e-12	7	yes
	ENSG00000146592	CREB5	7	28602225	ENSG00000163221	S100A12	1	153347154	0.135719	0.015623	3.71743e-18	5	yes
	ENSG00000146592	CREB5	7	28602225	ENSG00000163565	IFI16	1	158997351	0.106776	0.0154871	5.40607e-12	6	yes
	ENSG00000146592	CREB5	7	28602225	ENSG00000163568	AIM2	1	159074580	0.0916974	0.015445	2.90251e-09	6	yes
	ENSG00000146592	CREB5	7	28602225	ENSG00000163568	AIM2	1	159074580	0.0916974	0.015445	2.90251e-09	6	yes
	ENSG00000146592	CREB5	7	28602225	ENSG00000197965	MPZL1	1	167725792	-0.220138	0.015648	5.96424e-45	6	yes
	ENSG00000146592	CREB5	7	28602225	ENSG00000198734	F5	1	169519615	0.152176	0.0159374	1.31737e-21	5	yes
	ENSG00000146592	CREB5	7	28602225	ENSG00000159348	CYB5R1	1	202933702	0.0884983	0.0155367	1.22595e-08	6	yes
	ENSG00000146592	CREB5	7	28602225	ENSG00000133055	MYBPH	1	203140940	-0.111344	0.0152555	2.90851e-13	7	yes
	ENSG00000146592	CREB5	7	28602225	ENSG00000133048	CHI3L1	1	203151968	-0.125211	0.0169841	1.67762e-13	6	yes
	ENSG00000146592	CREB5	7	28602225	ENSG00000186205	45352	1	220973918	0.0946058	0.0173447	4.91248e-08	6	yes
	ENSG00000146592	CREB5	7	28602225	ENSG00000163050	ADCK3	1	227130241	-0.127187	0.0168295	4.11385e-14	6	yes
	ENSG00000146592	CREB5	7	28602225	ENSG00000116991	SIPA1L2	1	232615507	0.179521	0.0154838	4.41547e-31	5	yes
	ENSG00000146592	CREB5	7	28602225	ENSG00000175137	SH3BP5L	1	249112740	0.10484	0.0154274	1.07752e-11	6	yes
	ENSG00000146592	CREB5	7	28602225	ENSG00000091106	NLRC4	2	32470222	0.275847	0.015697	3.94838e-69	7	yes
	ENSG00000146592	CREB5	7	28602225	ENSG00000115828	QPCT	2	37586091	0.145681	0.0152785	1.49793e-21	7	yes
	ENSG00000146592	CREB5	7	28602225	ENSG00000162881	OXER1	2	42990521	0.111502	0.0152738	2.87268e-13	7	yes
	ENSG00000146592	CREB5	7	28602225	ENSG00000119729	RHOQ	2	46789602	-0.189174	0.0179709	6.50932e-26	6	yes
	ENSG00000146592	CREB5	7	28602225	ENSG00000197329	PELI1	2	64345687	-0.192022	0.0152287	1.87906e-36	7	yes
	ENSG00000146592	CREB5	7	28602225	ENSG00000225889	AC074289.1	2	64425183	-0.429339	0.0363447	3.34466e-32	7	yes
	ENSG00000146592	CREB5	7	28602225	ENSG00000221823	PPP3R1	2	68423366	-0.105218	0.0153043	6.19576e-12	7	yes
	ENSG00000146592	CREB5	7	28602225	ENSG00000163219	ARHGAP25	2	68980349	-0.177538	0.0155673	3.96686e-30	6	yes
	ENSG00000146592	CREB5	7	28602225	ENSG00000135636	DYSF	2	71797375	0.215512	0.0155291	8.6111e-44	7	yes
	ENSG00000146592	CREB5	7	28602225	ENSG00000196872	KIAA1211L	2	99481515	-0.0985264	0.0172342	1.08487e-08	5	yes
	ENSG00000146592	CREB5	7	28602225	ENSG00000196872	KIAA1211L	2	99481515	-0.0985264	0.0172342	1.08487e-08	5	yes
	ENSG00000146592	CREB5	7	28602225	ENSG00000115604	IL18R1	2	102971603	0.115578	0.0153189	4.53073e-14	7	yes
	ENSG00000146592	CREB5	7	28602225	ENSG00000115604	IL18R1	2	102971603	0.115578	0.0153189	4.53073e-14	7	yes
	ENSG00000146592	CREB5	7	28602225	ENSG00000115607	IL18RAP	2	103052087	0.129433	0.0155413	8.19923e-17	7	yes
	ENSG00000146592	CREB5	7	28602225	ENSG00000153094	BCL2L11	2	111901489	-0.138753	0.0157881	1.5158e-18	4	yes
	ENSG00000146592	CREB5	7	28602225	ENSG00000144136	SLC20A1	2	113412419	-0.107089	0.0154394	4.03108e-12	6	yes
	ENSG00000146592	CREB5	7	28602225	ENSG00000125538	IL1B	2	113590904	-0.106848	0.0154676	4.91938e-12	5	yes
	ENSG00000146592	CREB5	7	28602225	ENSG00000121966	CXCR4	2	136873827	0.110849	0.0153623	5.36865e-13	7	yes
	ENSG00000146592	CREB5	7	28602225	ENSG00000182389	CACNB4	2	152822441	-0.119503	0.0156657	2.37896e-14	5	yes
	ENSG00000146592	CREB5	7	28602225	ENSG00000123636	BAZ2B	2	160324346	-0.0912277	0.0152338	2.11764e-09	7	yes
	ENSG00000146592	CREB5	7	28602225	ENSG00000224152	AC009506.1	2	160472700	-0.240133	0.0363111	3.76097e-11	7	yes
	ENSG00000146592	CREB5	7	28602225	ENSG00000116044	NFE2L2	2	178174874	0.105973	0.0152892	4.17117e-12	7	yes
	ENSG00000146592	CREB5	7	28602225	ENSG00000138386	NAB1	2	191534482	-0.116148	0.0154985	6.67251e-14	6	yes
	ENSG00000146592	CREB5	7	28602225	ENSG00000003402	CFLAR	2	202004930	-0.10682	0.0167413	1.76332e-10	7	yes
	ENSG00000146592	CREB5	7	28602225	ENSG00000234902	AC007879.2	2	208076115	-0.239591	0.0367217	6.82315e-11	7	yes
	ENSG00000146592	CREB5	7	28602225	ENSG00000118260	CREB1	2	208431308	-0.114183	0.0156017	2.50537e-13	7	yes
	ENSG00000146592	CREB5	7	28602225	ENSG00000018280	SLC11A1	2	219254184	0.13572	0.0157953	8.51881e-18	5	yes
	ENSG00000146592	CREB5	7	28602225	ENSG00000135912	TTLL4	2	219597853	-0.0908887	0.0152918	2.78782e-09	7	yes
	ENSG00000146592	CREB5	7	28602225	ENSG00000135929	CYP27A1	2	219663244	-0.112172	0.0153199	2.44335e-13	7	yes
	ENSG00000146592	CREB5	7	28602225	ENSG00000157017	GHRL	3	10330995	-0.197837	0.0225331	1.63688e-18	7	yes
	ENSG00000146592	CREB5	7	28602225	ENSG00000144635	DYNC1LI1	3	32589914	-0.196919	0.0226957	4.0813e-18	7	yes
	ENSG00000146592	CREB5	7	28602225	ENSG00000172936	MYD88	3	38182241	0.1506	0.0153736	1.17095e-22	7	yes
	ENSG00000146592	CREB5	7	28602225	ENSG00000172939	OXSR1	3	38251779	0.0838314	0.0152334	3.731e-08	7	yes
	ENSG00000146592	CREB5	7	28602225	ENSG00000225611	RP11-70C1.1	3	42813615	-0.388901	0.0362531	7.5703e-27	7	yes
	ENSG00000146592	CREB5	7	28602225	ENSG00000183625	CCR3	3	46256646	-0.138716	0.0154153	2.28677e-19	6	yes
	ENSG00000146592	CREB5	7	28602225	ENSG00000114650	SCAP	3	47486909	-0.107341	0.0153519	2.70921e-12	6	yes
	ENSG00000146592	CREB5	7	28602225	ENSG00000185909	KLHDC8B	3	49211480	0.187845	0.0163051	1.03826e-30	5	yes
	ENSG00000146592	CREB5	7	28602225	ENSG00000163932	PRKCD	3	53208379	0.123789	0.0153121	6.24667e-16	7	yes
	ENSG00000146592	CREB5	7	28602225	ENSG00000114541	FRMD4B	3	69405437	0.0957838	0.0167649	1.10784e-08	7	yes
	ENSG00000146592	CREB5	7	28602225	ENSG00000163412	EIF4E3	3	71766182	0.105572	0.0153311	5.73166e-12	7	yes
	ENSG00000146592	CREB5	7	28602225	ENSG00000163421	PROK2	3	71827582	0.206565	0.0156399	7.93059e-40	5	yes
	ENSG00000146592	CREB5	7	28602225	ENSG00000138463	DIRC2	3	122556814	0.100237	0.0154033	7.64233e-11	7	yes
	ENSG00000146592	CREB5	7	28602225	ENSG00000163754	GYG1	3	148727273	0.221323	0.0227037	1.87564e-22	7	yes
	ENSG00000146592	CREB5	7	28602225	ENSG00000206199	ENSG00000206199	3	149582532	-0.128716	0.0193357	2.79658e-11	7	yes
	ENSG00000146592	CREB5	7	28602225	ENSG00000082996	RNF13	3	149605210	0.115221	0.0154123	7.66841e-14	6	yes
	ENSG00000146592	CREB5	7	28602225	ENSG00000243273	RP11-166N6.2	3	150682514	0.277541	0.0364702	2.73973e-14	7	yes
	ENSG00000146592	CREB5	7	28602225	ENSG00000196549	MME	3	154821705	0.197451	0.0153533	7.50824e-38	7	yes
	ENSG00000146592	CREB5	7	28602225	ENSG00000118855	MFSD1	3	158498747	0.0974942	0.0152385	1.57525e-10	7	yes
	ENSG00000146592	CREB5	7	28602225	ENSG00000172578	KLHL6	3	183239398	0.100605	0.0153068	4.94623e-11	7	yes
	ENSG00000146592	CREB5	7	28602225	ENSG00000196083	IL1RAP	3	190303841	-0.165598	0.0167396	4.48303e-23	7	yes
	ENSG00000146592	CREB5	7	28602225	ENSG00000163964	PIGX	3	196414762	-0.107677	0.0166358	9.63211e-11	7	yes
	ENSG00000146592	CREB5	7	28602225	ENSG00000163950	SLBP	4	1704404	-0.0862759	0.0153385	1.85737e-08	6	yes
	ENSG00000146592	CREB5	7	28602225	ENSG00000109743	BST1	4	15722254	0.118827	0.0153206	8.76421e-15	7	yes
	ENSG00000146592	CREB5	7	28602225	ENSG00000181826	RELL1	4	37640210	-0.101733	0.0169025	1.75688e-09	6	yes
	ENSG00000146592	CREB5	7	28602225	ENSG00000109790	KLHL5	4	39087568	-0.113738	0.0153928	1.47873e-13	6	yes
	ENSG00000146592	CREB5	7	28602225	ENSG00000169429	IL8	4	74607828	-0.241867	0.0170939	1.88648e-45	7	yes
	ENSG00000146592	CREB5	7	28602225	ENSG00000163739	CXCL1	4	74736034	-0.0900432	0.0155554	7.09932e-09	6	yes
	ENSG00000146592	CREB5	7	28602225	ENSG00000152784	PRDM8	4	81115258	-0.174755	0.0154117	8.40086e-30	6	yes
	ENSG00000146592	CREB5	7	28602225	ENSG00000173083	HPSE	4	84234960	0.121405	0.0153702	2.81769e-15	7	yes
	ENSG00000146592	CREB5	7	28602225	ENSG00000138801	PAPSS1	4	108576520	0.164308	0.0153228	7.93366e-27	7	yes
	ENSG00000146592	CREB5	7	28602225	ENSG00000170006	TMEM154	4	153570550	-0.115729	0.0155006	8.25803e-14	6	yes
	ENSG00000146592	CREB5	7	28602225	ENSG00000109756	RAPGEF2	4	160153325	0.156371	0.0168061	1.34723e-20	7	yes
	ENSG00000146592	CREB5	7	28602225	ENSG00000151726	ACSL1	4	185712360	0.161522	0.015547	2.77439e-25	6	yes
	ENSG00000146592	CREB5	7	28602225	ENSG00000145491	ROPN1L	5	10456888	0.113338	0.0167701	1.39549e-11	6	yes
	ENSG00000146592	CREB5	7	28602225	ENSG00000176788	BASP1	5	17247306	0.214829	0.0155903	3.37812e-43	6	yes
	ENSG00000146592	CREB5	7	28602225	ENSG00000248455	RP11-321E2.3	5	17422965	0.200934	0.0363278	3.18167e-08	7	yes
	ENSG00000146592	CREB5	7	28602225	ENSG00000249662	RP11-321E2.4	5	17464087	-0.19744	0.0183081	4.08339e-27	6	yes
	ENSG00000146592	CREB5	7	28602225	ENSG00000251304	RP11-321E2.5	5	17486637	-0.153193	0.0181076	2.66969e-17	7	yes
	ENSG00000146592	CREB5	7	28602225	ENSG00000174132	FAM174A	5	99896727	-0.0864706	0.0156273	3.14262e-08	5	yes
	ENSG00000146592	CREB5	7	28602225	ENSG00000113532	ST8SIA4	5	100192163	-0.101032	0.0154938	6.99414e-11	6	yes
	ENSG00000146592	CREB5	7	28602225	ENSG00000217128	FNIP1	5	130947147	-0.100315	0.0168177	2.44913e-09	6	yes
	ENSG00000146592	CREB5	7	28602225	ENSG00000164615	CAMLG	5	134081019	-0.103737	0.0167844	6.38734e-10	7	yes
	ENSG00000146592	CREB5	7	28602225	ENSG00000160883	HK3	5	176317101	0.0919481	0.015574	3.54932e-09	5	yes
	ENSG00000146592	CREB5	7	28602225	ENSG00000161011	SQSTM1	5	179249233	-0.144844	0.0153301	3.44392e-21	7	yes
	ENSG00000146592	CREB5	7	28602225	ENSG00000124588	NQO2	6	3004108	0.125922	0.015381	2.68205e-16	6	yes
	ENSG00000146592	CREB5	7	28602225	ENSG00000261015	RP1-90J20.11	6	3026342	0.224367	0.0364556	7.52983e-10	7	yes
	ENSG00000146592	CREB5	7	28602225	ENSG00000111837	MAK	6	10800860	-0.0968315	0.0154134	3.33575e-10	6	yes
	ENSG00000146592	CREB5	7	28602225	ENSG00000008083	JARID2	6	15384389	-0.1053	0.0153468	6.81901e-12	6	yes
	ENSG00000146592	CREB5	7	28602225	ENSG00000172197	MBOAT1	6	20156802	0.0853669	0.0154283	3.14529e-08	6	yes
	ENSG00000146592	CREB5	7	28602225	ENSG00000137261	KIAA0319	6	24595357	0.254158	0.0157695	1.93521e-58	6	yes
	ENSG00000146592	CREB5	7	28602225	ENSG00000111802	TDP2	6	24658733	0.217636	0.0152978	6.26563e-46	7	yes
	ENSG00000146592	CREB5	7	28602225	ENSG00000112304	ACOT13	6	24686278	0.139336	0.0154205	1.62907e-19	7	yes
	ENSG00000146592	CREB5	7	28602225	ENSG00000096063	SRPK1	6	35844931	0.400153	0.0165751	9.08751e-129	6	yes
	ENSG00000146592	CREB5	7	28602225	ENSG00000112053	SLC26A8	6	35951968	0.158604	0.0155804	2.44253e-24	6	yes
	ENSG00000146592	CREB5	7	28602225	ENSG00000112062	MAPK14	6	36037250	0.138387	0.015534	5.16549e-19	6	yes
	ENSG00000146592	CREB5	7	28602225	ENSG00000124496	TRERF1	6	42306229	-0.161134	0.0156052	5.39661e-25	6	yes
	ENSG00000146592	CREB5	7	28602225	ENSG00000135525	MAP7	6	136767760	-0.147746	0.0155435	1.99422e-21	7	yes
	ENSG00000146592	CREB5	7	28602225	ENSG00000027697	IFNGR1	6	137529603	-0.0926309	0.0153766	1.70011e-09	6	yes
	ENSG00000146592	CREB5	7	28602225	ENSG00000118503	TNFAIP3	6	138196400	-0.0866066	0.0152381	1.31917e-08	7	yes
	ENSG00000146592	CREB5	7	28602225	ENSG00000130363	RSPH3	6	159409265	-0.107459	0.0153797	2.80659e-12	7	yes
	ENSG00000146592	CREB5	7	28602225	ENSG00000112096	SOD2	6	160141828	-0.111133	0.0156109	1.08774e-12	6	yes
	ENSG00000146592	CREB5	7	28602225	ENSG00000189077	TMEM120A	7	75620066	0.0948315	0.0153077	5.82735e-10	6	yes
	ENSG00000146592	CREB5	7	28602225	ENSG00000058091	CDK14	7	90467821	0.0904699	0.0154082	4.31776e-09	6	yes
	ENSG00000146592	CREB5	7	28602225	ENSG00000128512	DOCK4	7	111606316	0.113244	0.0155088	2.83758e-13	7	yes
	ENSG00000146592	CREB5	7	28602225	ENSG00000128594	LRRC4	7	127669642	0.0835868	0.0152836	4.52476e-08	7	yes
	ENSG00000146592	CREB5	7	28602225	ENSG00000157800	SLC37A3	7	140048863	0.148524	0.0157406	3.88317e-21	5	yes
	ENSG00000146592	CREB5	7	28602225	ENSG00000257335	MGAM	7	141707080	0.135626	0.0155152	2.30081e-18	6	yes
	ENSG00000146592	CREB5	7	28602225	ENSG00000147408	CSGALNACT1	8	19438606	0.104381	0.0153173	9.45526e-12	7	yes
	ENSG00000146592	CREB5	7	28602225	ENSG00000147416	ATP6V1B2	8	20069604	-0.107678	0.0158617	1.13278e-11	5	yes
	ENSG00000146592	CREB5	7	28602225	ENSG00000120889	TNFRSF10B	8	22902169	-0.0854149	0.0153747	2.76714e-08	6	yes
	ENSG00000146592	CREB5	7	28602225	ENSG00000253616	RP11-875O11.3	8	22930445	-0.221696	0.0366139	1.40434e-09	6	yes
	ENSG00000146592	CREB5	7	28602225	ENSG00000173535	TNFRSF10C	8	22958409	-0.0906731	0.01544	4.29036e-09	5	yes
	ENSG00000146592	CREB5	7	28602225	ENSG00000147459	DOCK5	8	25158918	-0.160275	0.0154971	4.53704e-25	6	yes
	ENSG00000146592	CREB5	7	28602225	ENSG00000012232	EXTL3	8	28535551	0.189786	0.0155027	1.8512e-34	6	yes
	ENSG00000146592	CREB5	7	28602225	ENSG00000070501	POLB	8	42212649	-0.109383	0.0153117	9.08401e-13	7	yes
	ENSG00000146592	CREB5	7	28602225	ENSG00000253729	PRKDC	8	48779206	0.0982319	0.0168936	6.07309e-09	6	yes
	ENSG00000146592	CREB5	7	28602225	ENSG00000048392	RRM2B	8	103234038	-0.10573	0.0153021	4.86391e-12	7	yes
	ENSG00000146592	CREB5	7	28602225	ENSG00000165071	TMEM71	8	133735105	0.124857	0.0155922	1.16914e-15	5	yes
	ENSG00000146592	CREB5	7	28602225	ENSG00000122694	GLIPR2	9	36150321	0.153485	0.0153916	2.02082e-23	7	yes
	ENSG00000146592	CREB5	7	28602225	ENSG00000119121	TRPM6	9	77420210	0.111583	0.0154762	5.59617e-13	6	yes
	ENSG00000146592	CREB5	7	28602225	ENSG00000156052	GNAQ	9	80488688	-0.1017	0.0153142	3.11811e-11	7	yes
	ENSG00000146592	CREB5	7	28602225	ENSG00000106829	TLE4	9	82264173	0.0940396	0.0154932	1.28126e-09	6	yes
	ENSG00000146592	CREB5	7	28602225	ENSG00000178966	RMI1	9	86607305	-0.0853731	0.0152892	2.35229e-08	7	yes
	ENSG00000146592	CREB5	7	28602225	ENSG00000165030	NFIL3	9	94178735	0.174623	0.015489	1.76345e-29	6	yes
	ENSG00000146592	CREB5	7	28602225	ENSG00000148110	HIATL1	9	97180078	0.0879009	0.0153329	9.87705e-09	6	yes
	ENSG00000146592	CREB5	7	28602225	ENSG00000136867	SLC31A2	9	115919819	-0.0956031	0.0154226	5.6856e-10	6	yes
	ENSG00000146592	CREB5	7	28602225	ENSG00000229314	ORM1	9	117087045	0.142387	0.02259	2.91748e-10	7	yes
	ENSG00000146592	CREB5	7	28602225	ENSG00000120594	PLXDC2	10	20337227	0.10454	0.0152289	6.66799e-12	7	yes
	ENSG00000146592	CREB5	7	28602225	ENSG00000183621	ZNF438	10	31227214	0.128931	0.0155929	1.35558e-16	5	yes
	ENSG00000146592	CREB5	7	28602225	ENSG00000012779	ALOX5	10	45905611	0.145367	0.0153978	3.70156e-21	7	yes
	ENSG00000146592	CREB5	7	28602225	ENSG00000231964	RP11-67C2.2	10	45944293	0.240455	0.0364675	4.29045e-11	7	yes
	ENSG00000146592	CREB5	7	28602225	ENSG00000204169	AGAP7	10	51475244	-0.232196	0.0337619	6.09378e-12	7	yes
	ENSG00000146592	CREB5	7	28602225	ENSG00000108064	TFAM	10	60151881	-0.08979	0.0152493	3.90585e-09	7	yes
	ENSG00000146592	CREB5	7	28602225	ENSG00000122861	PLAU	10	75673095	0.0950384	0.0152331	4.40582e-10	7	yes
	ENSG00000146592	CREB5	7	28602225	ENSG00000108175	ZMIZ1	10	80952534	-0.126009	0.0154344	3.23721e-16	7	yes
	ENSG00000146592	CREB5	7	28602225	ENSG00000108179	PPIF	10	81111159	-0.182103	0.0159276	2.85394e-30	5	yes
	ENSG00000146592	CREB5	7	28602225	ENSG00000204020	LIPN	10	90529581	0.13452	0.0190577	1.6824e-12	6	yes
	ENSG00000146592	CREB5	7	28602225	ENSG00000026103	FAS	10	90762978	-0.112907	0.0155872	4.37011e-13	6	yes
	ENSG00000146592	CREB5	7	28602225	ENSG00000152804	HHEX	10	94451674	0.0928633	0.0153645	1.50317e-09	6	yes
	ENSG00000146592	CREB5	7	28602225	ENSG00000065613	SLK	10	105757975	-0.103187	0.0152983	1.53021e-11	7	yes
	ENSG00000146592	CREB5	7	28602225	ENSG00000184014	DENND5A	11	9223654	0.113004	0.015349	1.80776e-13	7	yes
	ENSG00000146592	CREB5	7	28602225	ENSG00000188487	INSC	11	15201362	0.105824	0.0168289	3.21095e-10	6	yes
	ENSG00000146592	CREB5	7	28602225	ENSG00000142186	SCYL1	11	65299361	-0.137138	0.0155401	1.09665e-18	5	yes
	ENSG00000146592	CREB5	7	28602225	ENSG00000137486	ARRB1	11	75019049	-0.126412	0.0154721	3.0758e-16	6	yes
	ENSG00000146592	CREB5	7	28602225	ENSG00000137486	ARRB1	11	75019049	-0.126412	0.0154721	3.0758e-16	6	yes
	ENSG00000146592	CREB5	7	28602225	ENSG00000109861	CTSC	11	88048857	-0.105091	0.0153949	8.71203e-12	6	yes
	ENSG00000146592	CREB5	7	28602225	ENSG00000160703	NLRX1	11	119046001	0.12541	0.0153027	2.5003e-16	7	yes
	ENSG00000146592	CREB5	7	28602225	ENSG00000248712	CCDC153	11	119063913	0.105019	0.01686	4.69767e-10	6	yes
	ENSG00000146592	CREB5	7	28602225	ENSG00000110080	ST3GAL4	11	126267887	0.0934946	0.0154266	1.35606e-09	6	yes
	ENSG00000146592	CREB5	7	28602225	ENSG00000067182	TNFRSF1A	12	6444601	-0.109333	0.0153983	1.24465e-12	6	yes
	ENSG00000146592	CREB5	7	28602225	ENSG00000111321	LTBR	12	6492472	-0.121093	0.0155348	6.44224e-15	5	yes
	ENSG00000146592	CREB5	7	28602225	ENSG00000250510	GPR162	12	6933648	-0.224851	0.0153588	1.56413e-48	6	yes
	ENSG00000146592	CREB5	7	28602225	ENSG00000059804	SLC2A3	12	8080348	0.141936	0.0160669	1.00935e-18	7	yes
	ENSG00000146592	CREB5	7	28602225	ENSG00000111729	CLEC4A	12	8283715	-0.114744	0.0153459	7.593e-14	7	yes
	ENSG00000146592	CREB5	7	28602225	ENSG00000166527	CLEC4D	12	8668516	0.143816	0.0158475	1.13664e-19	5	yes
	ENSG00000146592	CREB5	7	28602225	ENSG00000197992	CLEC9A	12	10200920	-0.130175	0.0154134	3.02596e-17	7	yes
	ENSG00000146592	CREB5	7	28602225	ENSG00000172243	CLEC7A	12	10276116	-0.0904415	0.0153365	3.69866e-09	7	yes
	ENSG00000146592	CREB5	7	28602225	ENSG00000183150	GPR19	12	12831483	-0.11489	0.0153381	6.86011e-14	7	yes
	ENSG00000146592	CREB5	7	28602225	ENSG00000060982	BCAT1	12	25033344	0.108818	0.0152447	9.46262e-13	7	yes
	ENSG00000146592	CREB5	7	28602225	ENSG00000061273	HDAC7	12	48201710	-0.108355	0.0154375	2.23597e-12	6	yes
	ENSG00000146592	CREB5	7	28602225	ENSG00000061273	HDAC7	12	48201710	-0.108355	0.0154375	2.23597e-12	6	yes
	ENSG00000146592	CREB5	7	28602225	ENSG00000161638	ITGA5	12	54801144	-0.103697	0.0153308	1.34284e-11	6	yes
	ENSG00000146592	CREB5	7	28602225	ENSG00000135677	GNS	12	65130226	0.0886749	0.0152709	6.36798e-09	7	yes
	ENSG00000146592	CREB5	7	28602225	ENSG00000175782	SLC35E3	12	69163815	-0.187194	0.0157374	1.25881e-32	5	yes
	ENSG00000146592	CREB5	7	28602225	ENSG00000135679	MDM2	12	69220585	-0.137665	0.0153959	3.83352e-19	7	yes
	ENSG00000146592	CREB5	7	28602225	ENSG00000136026	CKAP4	12	106664856	0.0967467	0.0154158	3.47776e-10	6	yes
	ENSG00000146592	CREB5	7	28602225	ENSG00000196850	PPTC7	12	110995122	-0.0977973	0.0152891	1.58941e-10	7	yes
	ENSG00000146592	CREB5	7	28602225	ENSG00000204852	TCTN1	12	111069533	-0.155516	0.0167999	2.10348e-20	6	yes
	ENSG00000146592	CREB5	7	28602225	ENSG00000122986	HVCN1	12	111104200	-0.0942728	0.0154783	1.12465e-09	7	yes
	ENSG00000146592	CREB5	7	28602225	ENSG00000110931	CAMKK2	12	121705804	0.154084	0.0153863	1.31785e-23	7	yes
	ENSG00000146592	CREB5	7	28602225	ENSG00000255398	HCAR3	12	123200371	0.123917	0.0182552	1.13665e-11	6	yes
	ENSG00000146592	CREB5	7	28602225	ENSG00000132965	ALOX5AP	13	31324100	0.111422	0.0155148	6.88817e-13	5	yes
	ENSG00000146592	CREB5	7	28602225	ENSG00000102445	KIAA0226L	13	46964232	0.127577	0.0170427	7.11623e-14	7	yes
	ENSG00000146592	CREB5	7	28602225	ENSG00000150403	TMCO3	13	114174926	0.134074	0.0154281	3.61622e-18	6	yes
	ENSG00000146592	CREB5	7	28602225	ENSG00000213903	LTB4R	14	24783949	0.156991	0.0153171	1.19069e-24	7	yes
	ENSG00000146592	CREB5	7	28602225	ENSG00000100906	NFKBIA	14	35872336	-0.135832	0.0228387	2.72375e-09	6	yes
	ENSG00000146592	CREB5	7	28602225	ENSG00000100504	PYGL	14	51368031	0.272067	0.0156876	2.23642e-67	7	yes
	ENSG00000146592	CREB5	7	28602225	ENSG00000100505	TRIM9	14	51502379	0.0888491	0.0157102	1.55384e-08	5	yes
	ENSG00000146592	CREB5	7	28602225	ENSG00000100612	DHRS7	14	60623706	0.102735	0.0153067	1.9223e-11	7	yes
	ENSG00000146592	CREB5	7	28602225	ENSG00000054654	SYNE2	14	64506424	0.156345	0.0155066	6.60383e-24	6	yes
	ENSG00000146592	CREB5	7	28602225	ENSG00000197555	SIPA1L1	14	71997556	0.104291	0.0153144	9.7593e-12	7	yes
	ENSG00000146592	CREB5	7	28602225	ENSG00000100605	ITPK1	14	93492962	-0.131122	0.0154406	2.03011e-17	6	yes
	ENSG00000146592	CREB5	7	28602225	ENSG00000185215	TNFAIP2	14	103596777	-0.144299	0.0155431	1.63472e-20	6	yes
	ENSG00000146592	CREB5	7	28602225	ENSG00000128872	TMOD2	15	52076161	0.0962134	0.0167642	9.51104e-09	7	yes
	ENSG00000146592	CREB5	7	28602225	ENSG00000069943	PIGB	15	55629502	-0.139766	0.0157753	8.0146e-19	5	yes
	ENSG00000146592	CREB5	7	28602225	ENSG00000180304	OAZ2	15	64987626	-0.133716	0.01682	1.86848e-15	7	yes
	ENSG00000146592	CREB5	7	28602225	ENSG00000138621	PPCDC	15	75362849	-0.10258	0.0152614	1.79803e-11	7	yes
	ENSG00000146592	CREB5	7	28602225	ENSG00000167173	C15orf39	15	75496247	-0.0840942	0.0153048	3.91564e-08	6	yes
	ENSG00000146592	CREB5	7	28602225	ENSG00000159556	ISL2	15	76631941	-0.110508	0.015326	5.57426e-13	7	yes
	ENSG00000146592	CREB5	7	28602225	ENSG00000136371	MTHFS	15	80157824	-0.277529	0.0158362	9.22659e-69	6	yes
	ENSG00000146592	CREB5	7	28602225	ENSG00000180953	ST20	15	80203613	-0.361242	0.0280825	7.21346e-38	7	yes
	ENSG00000146592	CREB5	7	28602225	ENSG00000140379	BCL2A1	15	80258509	-0.278654	0.0230193	9.90954e-34	6	yes
	ENSG00000146592	CREB5	7	28602225	ENSG00000166825	ANPEP	15	90343376	0.10462	0.0152659	7.2244e-12	7	yes
	ENSG00000146592	CREB5	7	28602225	ENSG00000140443	IGF1R	15	99349979	0.0975809	0.0152942	1.76803e-10	7	yes
	ENSG00000146592	CREB5	7	28602225	ENSG00000189067	LITAF	16	11686045	-0.0996871	0.0153605	8.59339e-11	6	yes
	ENSG00000146592	CREB5	7	28602225	ENSG00000103381	CPPED1	16	12827396	-0.139991	0.0154624	1.38258e-19	6	yes
	ENSG00000146592	CREB5	7	28602225	ENSG00000077238	IL4R	16	27350544	0.164204	0.0156026	6.68583e-26	6	yes
	ENSG00000146592	CREB5	7	28602225	ENSG00000250616	RP11-455F5.3	16	30111594	-0.214924	0.0365074	3.92941e-09	6	yes
	ENSG00000146592	CREB5	7	28602225	ENSG00000169896	ITGAM	16	31307762	0.149574	0.0153799	2.35227e-22	7	yes
	ENSG00000146592	CREB5	7	28602225	ENSG00000140678	ITGAX	16	31380386	0.161707	0.0169518	1.43894e-21	6	yes
	ENSG00000146592	CREB5	7	28602225	ENSG00000125170	DOK4	16	57513551	0.170241	0.0153435	1.32199e-28	7	yes
	ENSG00000146592	CREB5	7	28602225	ENSG00000182885	GPR97	16	57713037	0.100737	0.0154321	6.6746e-11	6	yes
	ENSG00000146592	CREB5	7	28602225	ENSG00000217555	CKLF	16	66593398	0.13773	0.0155013	6.38802e-19	7	yes
	ENSG00000146592	CREB5	7	28602225	ENSG00000140932	CMTM2	16	66617764	0.117764	0.0153411	1.63638e-14	7	yes
	ENSG00000146592	CREB5	7	28602225	ENSG00000103196	CRISPLD2	16	84903982	0.180688	0.0154125	9.66341e-32	6	yes
	ENSG00000146592	CREB5	7	28602225	ENSG00000174238	PITPNA	17	1443561	-0.0943353	0.0154094	9.24496e-10	6	yes
	ENSG00000146592	CREB5	7	28602225	ENSG00000167703	SLC43A2	17	1504926	-0.115746	0.0153204	4.18841e-14	7	yes
	ENSG00000146592	CREB5	7	28602225	ENSG00000131480	AOC2	17	40999670	-0.125419	0.0155338	6.8041e-16	5	yes
	ENSG00000146592	CREB5	7	28602225	ENSG00000008294	SPAG9	17	49118880	-0.130906	0.0152973	1.15407e-17	7	yes
	ENSG00000146592	CREB5	7	28602225	ENSG00000167434	CA4	17	58237778	0.176331	0.0154311	3.06574e-30	6	yes
	ENSG00000146592	CREB5	7	28602225	ENSG00000170921	TANC2	17	61295988	0.109919	0.0187217	4.32627e-09	7	yes
	ENSG00000146592	CREB5	7	28602225	ENSG00000186074	CD300LF	17	72699784	-0.0928166	0.0154129	1.72273e-09	6	yes
	ENSG00000146592	CREB5	7	28602225	ENSG00000129657	SEC14L1	17	75147988	-0.128725	0.0155362	1.17607e-16	6	yes
	ENSG00000146592	CREB5	7	28602225	ENSG00000101558	VAPA	18	9937008	0.0855701	0.015343	2.44489e-08	7	yes
	ENSG00000146592	CREB5	7	28602225	ENSG00000154889	MPPE1	18	11895921	-0.0899734	0.0153112	4.19531e-09	6	yes
	ENSG00000146592	CREB5	7	28602225	ENSG00000141447	OSBPL1A	18	21859926	0.0941396	0.0153466	8.55771e-10	7	yes
	ENSG00000146592	CREB5	7	28602225	ENSG00000101493	ZNF516	18	74138395	0.110615	0.0153309	5.38635e-13	7	yes
	ENSG00000146592	CREB5	7	28602225	ENSG00000197971	MBP	18	74768211	-0.102418	0.0153316	2.38671e-11	7	yes
	ENSG00000146592	CREB5	7	28602225	ENSG00000133275	CSNK1G2	19	1961262	-0.111462	0.015431	5.07601e-13	7	yes
	ENSG00000146592	CREB5	7	28602225	ENSG00000129353	SLC44A2	19	10734184	-0.100113	0.0153461	6.8593e-11	6	yes
	ENSG00000146592	CREB5	7	28602225	ENSG00000105612	DNASE2	19	12989153	-0.0873299	0.0155893	2.12016e-08	5	yes
	ENSG00000146592	CREB5	7	28602225	ENSG00000186529	CYP4F3	19	15762670	0.114149	0.0155089	1.83666e-13	6	yes
	ENSG00000146592	CREB5	7	28602225	ENSG00000160410	SHKBP1	19	41090031	0.124173	0.0154464	9.0601e-16	6	yes
	ENSG00000146592	CREB5	7	28602225	ENSG00000011422	PLAUR	19	44162473	0.126486	0.0153808	1.97416e-16	7	yes
	ENSG00000146592	CREB5	7	28602225	ENSG00000104856	RELB	19	45523070	-0.126463	0.0153765	1.96054e-16	6	yes
	ENSG00000146592	CREB5	7	28602225	ENSG00000008438	PGLYRP1	19	46524367	0.220254	0.015413	2.5223e-46	6	yes
	ENSG00000146592	CREB5	7	28602225	ENSG00000142512	SIGLEC10	19	51917166	-0.154552	0.0158295	1.61466e-22	4	yes
	ENSG00000146592	CREB5	7	28602225	ENSG00000142405	NLRP12	19	54312252	0.105184	0.0154932	1.12888e-11	6	yes
	ENSG00000146592	CREB5	7	28602225	ENSG00000187116	LILRA5	19	54821381	0.0918239	0.0155076	3.19592e-09	7	yes
	ENSG00000146592	CREB5	7	28602225	ENSG00000104974	LILRA1	19	55109301	-0.144177	0.0227865	2.49499e-10	7	yes
	ENSG00000146592	CREB5	7	28602225	ENSG00000125780	TGM3	20	2299185	0.192384	0.0155542	3.86538e-35	6	yes
	ENSG00000146592	CREB5	7	28602225	ENSG00000125772	GPCPD1	20	5558378	0.118284	0.015951	1.21199e-13	5	yes
	ENSG00000146592	CREB5	7	28602225	ENSG00000077984	CST7	20	24935215	0.107816	0.0155086	3.60161e-12	5	yes
	ENSG00000146592	CREB5	7	28602225	ENSG00000101474	APMAP	20	24958588	0.123159	0.0169996	4.33069e-13	7	yes
	ENSG00000146592	CREB5	7	28602225	ENSG00000078804	TP53INP2	20	33296668	-0.151711	0.0153536	5.02559e-23	6	yes
	ENSG00000146592	CREB5	7	28602225	ENSG00000100985	MMP9	20	44641373	0.17828	0.0156925	6.55417e-30	4	yes
	ENSG00000146592	CREB5	7	28602225	ENSG00000087589	CASS4	20	55010782	-0.104784	0.0152321	6.02077e-12	7	yes
	ENSG00000146592	CREB5	7	28602225	ENSG00000155307	SAMSN1	21	15906636	0.127288	0.0154312	1.6008e-16	6	yes
	ENSG00000146592	CREB5	7	28602225	ENSG00000157551	KCNJ15	21	39601438	0.108024	0.015583	4.14511e-12	6	yes
	ENSG00000146592	CREB5	7	28602225	ENSG00000159496	RGL4	22	24035843	0.224846	0.0158591	1.25875e-45	5	yes
	ENSG00000146592	CREB5	7	28602225	ENSG00000183762	KREMEN1	22	29516693	0.195504	0.0155262	2.34081e-36	6	yes
	ENSG00000146592	CREB5	7	28602225	ENSG00000138942	RNF185	22	31579583	0.223691	0.0252597	8.31952e-19	6	yes
	ENSG00000146592	CREB5	7	28602225	ENSG00000241878	PISD	22	32036447	-0.0926927	0.0153758	1.65514e-09	6	yes
	ENSG00000146592	CREB5	7	28602225	ENSG00000100368	CSF2RB	22	37323080	-0.129181	0.015629	1.39139e-16	5	yes
	ENSG00000185811	IKZF1	7	50408259	ENSG00000049249	TNFRSF9	1	7990416	-0.224423	0.0364271	7.23375e-10	4	yes
	ENSG00000185811	IKZF1	7	50408259	ENSG00000116299	KIAA1324	1	109702851	-0.268348	0.0374454	7.70072e-13	3	yes
	ENSG00000185811	IKZF1	7	50408259	ENSG00000133055	MYBPH	1	203140940	-0.272439	0.037751	5.32451e-13	3	yes
	ENSG00000185811	IKZF1	7	50408259	ENSG00000133048	CHI3L1	1	203151968	-0.371839	0.0417731	5.51433e-19	3	yes
	ENSG00000185811	IKZF1	7	50408259	ENSG00000172037	LAMB2	3	49164549	-0.441456	0.0390321	1.16985e-29	4	yes
	ENSG00000185811	IKZF1	7	50408259	ENSG00000196549	MME	3	154821705	-0.218163	0.0368219	3.1265e-09	3	yes
	ENSG00000185811	IKZF1	7	50408259	ENSG00000163625	WDFY3	4	85739124	-0.228025	0.0393689	6.95467e-09	3	yes
	ENSG00000185811	IKZF1	7	50408259	ENSG00000138646	HERC5	4	89402791	0.225964	0.0360077	3.48641e-10	4	yes
	ENSG00000185811	IKZF1	7	50408259	ENSG00000113749	HRH2	5	175099139	-0.237925	0.0365825	7.8326e-11	4	yes
	ENSG00000185811	IKZF1	7	50408259	ENSG00000112195	TREML2	6	41163473	-0.213693	0.036259	3.78061e-09	4	yes
	ENSG00000185811	IKZF1	7	50408259	ENSG00000133816	MICAL2	11	12200438	-0.363001	0.053647	1.31957e-11	4	yes
	ENSG00000185811	IKZF1	7	50408259	ENSG00000149131	SERPING1	11	57373593	-0.219928	0.0367298	2.12804e-09	3	yes
	ENSG00000185811	IKZF1	7	50408259	ENSG00000111321	LTBR	12	6492472	-0.259182	0.0386995	2.12289e-11	3	yes
	ENSG00000185811	IKZF1	7	50408259	ENSG00000138613	APH1B	15	63584771	0.224019	0.036278	6.61386e-10	4	yes
	ENSG00000185811	IKZF1	7	50408259	ENSG00000170776	AKAP13	15	86108194	-0.213666	0.036747	6.08038e-09	3	yes
	ENSG00000185811	IKZF1	7	50408259	ENSG00000185033	SEMA4B	15	90738373	-0.229579	0.0394613	5.96153e-09	3	yes
	ENSG00000185811	IKZF1	7	50408259	ENSG00000074660	SCARF1	17	1543096	-0.234139	0.0369558	2.36321e-10	3	yes
	ENSG00000185811	IKZF1	7	50408259	ENSG00000167536	DHRS13	17	27227444	-0.197848	0.0362693	4.89831e-08	4	yes
	ENSG00000185811	IKZF1	7	50408259	ENSG00000134755	DSC2	18	28664159	-0.347933	0.0381083	6.84394e-20	3	yes
	ENSG00000185811	IKZF1	7	50408259	ENSG00000183019	C19orf59	19	7743113	-0.292034	0.0408113	8.32319e-13	4	yes
	ENSG00000185811	IKZF1	7	50408259	ENSG00000089351	GRAMD1A	19	35501531	-0.264449	0.0365983	4.9845e-13	4	yes
	ENSG00000185811	IKZF1	7	50408259	ENSG00000124102	PI3	20	43804351	-0.274474	0.0389205	1.76154e-12	3	yes
	ENSG00000185811	IKZF1	7	50408259	ENSG00000124256	ZBP1	20	56187267	0.205772	0.0367479	2.14907e-08	4	yes
	ENSG00000132436	FIGNL1	7	50514959	ENSG00000162599	NFIA	1	61629698	0.184436	0.0261966	1.91623e-12	3	yes
	ENSG00000132436	FIGNL1	7	50514959	ENSG00000179914	ITLN1	1	160850644	-0.354468	0.0387879	6.32577e-20	3	yes
	ENSG00000132436	FIGNL1	7	50514959	ENSG00000162873	KLHDC8A	1	205315693	0.162687	0.0260473	4.21543e-10	3	yes
	ENSG00000132436	FIGNL1	7	50514959	ENSG00000135924	DNAJB2	2	220147805	0.157116	0.0256888	9.58731e-10	3	yes
	ENSG00000132436	FIGNL1	7	50514959	ENSG00000178694	NSUN3	3	93814574	-0.222512	0.0259287	9.34795e-18	3	yes
	ENSG00000132436	FIGNL1	7	50514959	ENSG00000178694	NSUN3	3	93814574	-0.222512	0.0259287	9.34795e-18	3	yes
	ENSG00000132436	FIGNL1	7	50514959	ENSG00000145423	SFRP2	4	154706008	-0.140837	0.0258063	4.82959e-08	3	yes
	ENSG00000132436	FIGNL1	7	50514959	ENSG00000196923	PDLIM7	5	176917501	-0.181933	0.0280411	8.69467e-11	3	yes
	ENSG00000132436	FIGNL1	7	50514959	ENSG00000112146	FBXO9	6	52941230	0.22253	0.0256737	4.41218e-18	3	yes
	ENSG00000132436	FIGNL1	7	50514959	ENSG00000106263	EIF3B	7	2407050	0.208513	0.0256891	4.78631e-16	3	yes
	ENSG00000132436	FIGNL1	7	50514959	ENSG00000153814	JAZF1	7	28045277	0.221926	0.025673	5.41158e-18	3	yes
	ENSG00000132436	FIGNL1	7	50514959	ENSG00000186591	UBE2H	7	129531680	0.155334	0.0256939	1.48917e-09	3	yes
	ENSG00000132436	FIGNL1	7	50514959	ENSG00000133606	MKRN1	7	140166104	0.276597	0.038169	4.27209e-13	3	yes
	ENSG00000132436	FIGNL1	7	50514959	ENSG00000055118	KCNH2	7	150658726	0.232145	0.0256929	1.63451e-19	3	yes
	ENSG00000132436	FIGNL1	7	50514959	ENSG00000179632	MAF1	8	145160958	0.207286	0.0260134	1.60713e-15	3	yes
	ENSG00000132436	FIGNL1	7	50514959	ENSG00000165283	STOML2	9	35101521	0.207762	0.0256792	5.93334e-16	3	yes
	ENSG00000132436	FIGNL1	7	50514959	ENSG00000233820	RP11-535M15.2	9	99488961	0.206448	0.0356465	6.97475e-09	3	yes
	ENSG00000132436	FIGNL1	7	50514959	ENSG00000136842	TMOD1	9	100313742	0.198608	0.0257187	1.14224e-14	3	yes
	ENSG00000132436	FIGNL1	7	50514959	ENSG00000136908	DPM2	9	130699070	0.170485	0.0257488	3.56592e-11	3	yes
	ENSG00000132436	FIGNL1	7	50514959	ENSG00000148341	SH3GLB2	9	131779948	0.208594	0.0258234	6.60027e-16	3	yes
	ENSG00000132436	FIGNL1	7	50514959	ENSG00000156515	HK1	10	71095689	0.165695	0.0260943	2.1552e-10	3	yes
	ENSG00000132436	FIGNL1	7	50514959	ENSG00000177666	PNPLA2	11	822237	0.176824	0.0257121	6.10884e-12	3	yes
	ENSG00000132436	FIGNL1	7	50514959	ENSG00000167994	RAB3IL1	11	61676257	0.145944	0.0258011	1.54497e-08	3	yes
	ENSG00000132436	FIGNL1	7	50514959	ENSG00000180771	SRSF8	11	94802222	0.158653	0.0281271	1.69486e-08	3	yes
	ENSG00000132436	FIGNL1	7	50514959	ENSG00000196914	ARHGEF12	11	120284216	0.146483	0.0257825	1.33522e-08	3	yes
	ENSG00000132436	FIGNL1	7	50514959	ENSG00000111678	C12orf57	12	7053653	-0.142371	0.0257315	3.14906e-08	3	yes
	ENSG00000132436	FIGNL1	7	50514959	ENSG00000060138	YBX3	12	10863797	-0.162783	0.0282441	8.24209e-09	3	yes
	ENSG00000132436	FIGNL1	7	50514959	ENSG00000119681	LTBP2	14	75022089	0.16834	0.0281676	2.28184e-09	3	yes
	ENSG00000132436	FIGNL1	7	50514959	ENSG00000067836	ROGDI	16	4849960	-0.17842	0.0256811	3.71757e-12	3	yes
	ENSG00000132436	FIGNL1	7	50514959	ENSG00000153048	CARHSP1	16	8954832	0.151707	0.0257431	3.79014e-09	3	yes
	ENSG00000132436	FIGNL1	7	50514959	ENSG00000103342	GSPT1	16	11985962	0.228247	0.0256657	5.94403e-19	3	yes
	ENSG00000132436	FIGNL1	7	50514959	ENSG00000157045	NTAN1	16	15140815	0.246344	0.0381903	1.1153e-10	3	yes
	ENSG00000132436	FIGNL1	7	50514959	ENSG00000166783	KIAA0430	16	15712633	0.146649	0.0257313	1.20327e-08	3	yes
	ENSG00000132436	FIGNL1	7	50514959	ENSG00000090238	YPEL3	16	30105935	0.170064	0.0258077	4.40796e-11	3	yes
	ENSG00000132436	FIGNL1	7	50514959	ENSG00000205250	E2F4	16	67229446	0.144292	0.0257127	2.00346e-08	3	yes
	ENSG00000132436	FIGNL1	7	50514959	ENSG00000154803	FLCN	17	17128014	0.153709	0.0260715	3.73183e-09	3	yes
	ENSG00000132436	FIGNL1	7	50514959	ENSG00000204815	TTC25	17	40102268	-0.161557	0.0258031	3.82139e-10	3	yes
	ENSG00000132436	FIGNL1	7	50514959	ENSG00000198336	MYL4	17	45289428	-0.313092	0.0256527	2.92164e-34	3	yes
	ENSG00000132436	FIGNL1	7	50514959	ENSG00000129355	CDKN2D	19	10678436	0.155986	0.0256895	1.26341e-09	3	yes
	ENSG00000132436	FIGNL1	7	50514959	ENSG00000130159	ECSIT	19	11628360	0.147836	0.0257789	9.76361e-09	3	yes
	ENSG00000132436	FIGNL1	7	50514959	ENSG00000105610	KLF1	19	12996616	0.205692	0.025792	1.52363e-15	3	yes
	ENSG00000132436	FIGNL1	7	50514959	ENSG00000179262	RAD23A	19	13060562	0.172997	0.0257289	1.76981e-11	3	yes
	ENSG00000132436	FIGNL1	7	50514959	ENSG00000105393	BABAM1	19	17385108	0.224537	0.0285453	3.66197e-15	3	yes
	ENSG00000132436	FIGNL1	7	50514959	ENSG00000090013	BLVRB	19	40962721	-0.15868	0.0257481	7.1478e-10	3	yes
	ENSG00000132436	FIGNL1	7	50514959	ENSG00000105402	NAPA	19	48004695	0.151906	0.0260972	5.85681e-09	3	yes
	ENSG00000132436	FIGNL1	7	50514959	ENSG00000100104	SRRD	22	26883871	0.153752	0.0256975	2.18854e-09	3	yes
	ENSG00000132436	FIGNL1	7	50514959	ENSG00000186998	EMID1	22	29628713	-0.177289	0.0257264	5.52695e-12	3	yes
	ENSG00000132436	FIGNL1	7	50514959	ENSG00000100116	GCAT	22	38208547	-0.171076	0.0257892	3.27565e-11	3	yes
	ENSG00000132436	FIGNL1	7	50514959	ENSG00000186654	PRR5	22	45099077	0.157228	0.0259019	1.27821e-09	3	yes
	ENSG00000066923	STAG3	7	99797148	ENSG00000156265	MAP3K7CL	21	30499001	-0.176822	0.0294441	1.90928e-09	6	yes
	ENSG00000121716	PILRB	7	99949578	ENSG00000156265	MAP3K7CL	21	30499001	0.0691715	0.0114058	1.32284e-09	9	yes
	ENSG00000122779	TRIM24	7	138209908	ENSG00000171729	TMEM51	1	15513002	-0.153736	0.0202793	3.43028e-14	4	yes
	ENSG00000122779	TRIM24	7	138209908	ENSG00000173597	SULT1B1	4	70623122	-0.316323	0.021018	3.4446e-51	3	yes
	ENSG00000122779	TRIM24	7	138209908	ENSG00000038427	VCAN	5	82822703	-0.146039	0.0197029	1.24368e-13	5	yes
	ENSG00000122779	TRIM24	7	138209908	ENSG00000075618	FSCN1	7	5639362	0.124297	0.0200736	5.93816e-10	5	yes
	ENSG00000122779	TRIM24	7	138209908	ENSG00000146592	CREB5	7	28602225	-0.247492	0.0204673	1.16347e-33	4	yes
	ENSG00000122779	TRIM24	7	138209908	ENSG00000165092	ALDH1A1	9	75605468	-0.32573	0.0196242	7.16256e-62	5	yes
	ENSG00000122779	TRIM24	7	138209908	ENSG00000196730	DAPK1	9	90217845	-0.117669	0.0198306	2.96143e-09	5	yes
	ENSG00000122779	TRIM24	7	138209908	ENSG00000174718	KIAA1551	12	32129171	-0.246952	0.0219538	2.35084e-29	5	yes
	ENSG00000122779	TRIM24	7	138209908	ENSG00000139174	PRICKLE1	12	42918148	-0.136448	0.0216921	3.17003e-10	5	yes
	ENSG00000122779	TRIM24	7	138209908	ENSG00000179104	TMTC2	12	83304654	-0.161673	0.0199438	5.21337e-16	5	yes
	ENSG00000122779	TRIM24	7	138209908	ENSG00000111144	LTA4H	12	96415952	-0.183488	0.0203491	1.93346e-19	3	yes
	ENSG00000122779	TRIM24	7	138209908	ENSG00000111275	ALDH2	12	112226236	0.129656	0.0198454	6.43439e-11	5	yes
	ENSG00000122779	TRIM24	7	138209908	ENSG00000198848	CES1	16	55852006	-0.402151	0.043199	1.28697e-20	5	yes
	ENSG00000181220	ZNF746	7	149182396	ENSG00000121310	ECHDC2	1	53377270	-0.211723	0.0301689	2.25201e-12	7	yes
	ENSG00000181220	ZNF746	7	149182396	ENSG00000008300	CELSR3	3	48687125	-0.171745	0.030105	1.16432e-08	7	yes
	ENSG00000181220	ZNF746	7	149182396	ENSG00000196155	PLEKHG4	16	67317407	-0.29178	0.032547	3.10653e-19	6	yes
	ENSG00000181220	ZNF746	7	149182396	ENSG00000178789	CD300LB	17	72522463	0.235001	0.035499	3.59396e-11	4	yes
	ENSG00000181220	ZNF746	7	149182396	ENSG00000176014	TUBB6	18	12325993	-0.19867	0.0298388	2.77349e-11	7	yes
	ENSG00000181220	ZNF746	7	149182396	ENSG00000196218	RYR1	19	39001271	-0.184757	0.0300578	7.90888e-10	7	yes
	ENSG00000248538	RP11-10A14.5	8	9053442	ENSG00000175606	TMEM70	8	74889845	-0.0841986	0.00852276	5.12047e-23	3	no
	ENSG00000248538	RP11-10A14.5	8	9053442	ENSG00000081181	ARG2	14	68102476	0.150147	0.00943288	4.79673e-57	3	no
	ENSG00000175806	MSRA	8	10099089	ENSG00000224614	TNK2-AS1	3	195636537	0.398587	0.0624864	1.78504e-10	6	no
	ENSG00000175806	MSRA	8	10099089	ENSG00000081181	ARG2	14	68102476	-0.17618	0.0283931	5.46859e-10	6	no
	ENSG00000255310	AF131215.2	8	10966267	ENSG00000224614	TNK2-AS1	3	195636537	-0.224287	0.0402596	2.53272e-08	3	no
	ENSG00000255310	AF131215.2	8	10966267	ENSG00000081181	ARG2	14	68102476	0.107487	0.0185314	6.62191e-09	3	no
	ENSG00000167034	NKX3-1	8	23538323	ENSG00000171049	FPR2	19	52264529	-0.119064	0.0175781	1.2574e-11	3	no
	ENSG00000167034	NKX3-1	8	23538323	ENSG00000171051	FPR1	19	52277894	-0.135509	0.0175681	1.22584e-14	3	no
	ENSG00000022567	SLC45A4	8	142267834	ENSG00000244617	ASPRV1	2	70188311	-0.133706	0.0175609	2.66007e-14	6	yes
	ENSG00000022567	SLC45A4	8	142267834	ENSG00000154928	EPHB1	3	134647976	0.109483	0.0159057	5.85119e-12	5	yes
	ENSG00000022567	SLC45A4	8	142267834	ENSG00000170448	NFXL1	4	47882955	-0.107971	0.0159982	1.48925e-11	4	yes
	ENSG00000022567	SLC45A4	8	142267834	ENSG00000123505	AMD1	6	111206444	0.224157	0.0161014	4.68394e-44	6	yes
	ENSG00000022567	SLC45A4	8	142267834	ENSG00000175003	SLC22A1	6	160561285	0.101897	0.0157097	8.80064e-11	6	yes
	ENSG00000022567	SLC45A4	8	142267834	ENSG00000059377	TBXAS1	7	139598487	0.103552	0.0159625	8.74393e-11	5	yes
	ENSG00000022567	SLC45A4	8	142267834	ENSG00000155096	AZIN1	8	103872338	0.116218	0.0159146	2.82243e-13	5	yes
	ENSG00000022567	SLC45A4	8	142267834	ENSG00000214688	C10orf105	10	73484519	0.175463	0.023382	6.18056e-14	5	yes
	ENSG00000022567	SLC45A4	8	142267834	ENSG00000149798	CDC42EP2	11	65086094	-0.0903302	0.0159787	1.57535e-08	3	yes
	ENSG00000022567	SLC45A4	8	142267834	ENSG00000135407	AVIL	12	58201823	0.157495	0.0210845	8.03769e-14	6	yes
	ENSG00000022567	SLC45A4	8	142267834	ENSG00000134152	KATNBL1	15	34467586	0.115415	0.0182212	2.38688e-10	6	yes
	ENSG00000022567	SLC45A4	8	142267834	ENSG00000180304	OAZ2	15	64987626	-0.245878	0.0179539	1.08889e-42	5	yes
	ENSG00000022567	SLC45A4	8	142267834	ENSG00000159720	ATP6V0D1	16	67493528	0.110824	0.0159991	4.30044e-12	5	yes
	ENSG00000022567	SLC45A4	8	142267834	ENSG00000109107	ALDOC	17	26902207	-0.123345	0.0158049	5.98576e-15	6	yes
	ENSG00000022567	SLC45A4	8	142267834	ENSG00000033627	ATP6V0A1	17	40642745	0.0927616	0.0158443	4.78268e-09	5	yes
	ENSG00000022567	SLC45A4	8	142267834	ENSG00000131467	PSME3	17	40986088	-0.0922778	0.0161147	1.02634e-08	4	yes
	ENSG00000184489	PTP4A3	8	142421856	ENSG00000170448	NFXL1	4	47882955	0.460733	0.0722556	1.81259e-10	5	yes
	ENSG00000178685	PARP10	8	145069130	ENSG00000115523	GNLY	2	85919137	-0.268499	0.0413432	8.33734e-11	3	yes
	ENSG00000183784	C9orf66	9	214500	ENSG00000256263	ENSG00000256263	12	92834	1.01469	0.140272	4.69857e-13	3	no
	ENSG00000165006	UBAP1	9	34215762	ENSG00000164683	HEY1	8	80678171	0.497963	0.0736271	1.34878e-11	5	yes
	ENSG00000081377	CDC14B	9	99317317	ENSG00000013016	EHD3	2	31474596	0.711898	0.0327537	9.60502e-105	7	yes
	ENSG00000081377	CDC14B	9	99317317	ENSG00000163430	FSTL1	3	120140620	0.798198	0.0335923	8.38427e-125	8	yes
	ENSG00000081377	CDC14B	9	99317317	ENSG00000061918	GUCY1B3	4	156704443	0.815714	0.0316193	9.35286e-147	7	yes
	ENSG00000081377	CDC14B	9	99317317	ENSG00000151023	ENKUR	10	25287996	0.163055	0.0282152	7.51498e-09	6	yes
	ENSG00000081377	CDC14B	9	99317317	ENSG00000103740	ACSBG1	15	78498920	0.870934	0.0338576	6.39568e-146	8	yes
	ENSG00000081377	CDC14B	9	99317317	ENSG00000167100	SAMD14	17	48197325	1.00393	0.0640094	1.94266e-55	7	yes
	ENSG00000136932	C9orf156	9	100675811	ENSG00000151789	ZNF385D	3	21937363	0.140489	0.0231593	1.30961e-09	3	yes
	ENSG00000136932	C9orf156	9	100675811	ENSG00000154917	RAB6B	3	133578881	-0.137798	0.0232761	3.21643e-09	3	yes
	ENSG00000136932	C9orf156	9	100675811	ENSG00000180354	C7orf41	7	30188402	0.172428	0.0250975	6.40704e-12	3	yes
	ENSG00000136932	C9orf156	9	100675811	ENSG00000111644	ACRBP	12	6751933	0.138898	0.0229478	1.42385e-09	3	yes
	ENSG00000136932	C9orf156	9	100675811	ENSG00000156265	MAP3K7CL	21	30499001	0.147719	0.025442	6.39518e-09	3	yes
	ENSG00000198121	LPAR1	9	113718262	ENSG00000014914	MTMR11	1	149904667	0.0826314	0.0104794	3.14143e-15	8	yes
	ENSG00000198121	LPAR1	9	113718262	ENSG00000138061	CYP1B1	2	38315580	0.0633691	0.0104893	1.5288e-09	6	yes
	ENSG00000198121	LPAR1	9	113718262	ENSG00000151458	ANKRD50	4	125609547	0.0573509	0.0104648	4.24419e-08	8	yes
	ENSG00000198121	LPAR1	9	113718262	ENSG00000164124	TMEM144	4	159149659	0.0722696	0.0109149	3.56352e-11	6	yes
	ENSG00000198121	LPAR1	9	113718262	ENSG00000153071	DAB2	5	39417091	-0.0635832	0.0114391	2.72252e-08	8	yes
	ENSG00000198121	LPAR1	9	113718262	ENSG00000038427	VCAN	5	82822703	0.0783102	0.0104482	6.62355e-14	7	yes
	ENSG00000198121	LPAR1	9	113718262	ENSG00000138829	FBN2	5	127794239	0.0662716	0.010431	2.10703e-10	8	yes
	ENSG00000198121	LPAR1	9	113718262	ENSG00000160883	HK3	5	176317101	0.0585976	0.0104323	1.94374e-08	8	yes
	ENSG00000198121	LPAR1	9	113718262	ENSG00000205269	TMEM170B	6	11560847	0.0732676	0.0127957	1.02863e-08	8	yes
	ENSG00000198121	LPAR1	9	113718262	ENSG00000172594	SMPDL3A	6	123120590	0.0588619	0.0104558	1.80646e-08	7	yes
	ENSG00000198121	LPAR1	9	113718262	ENSG00000135218	CD36	7	80153742	0.0690114	0.0104496	3.99599e-11	7	yes
	ENSG00000198121	LPAR1	9	113718262	ENSG00000187796	CARD9	9	139262244	0.0705234	0.0118961	3.06141e-09	6	yes
	ENSG00000198121	LPAR1	9	113718262	ENSG00000197746	PSAP	10	73593590	0.0700737	0.0104788	2.27478e-11	8	yes
	ENSG00000198121	LPAR1	9	113718262	ENSG00000110077	MS4A6A	11	59945610	0.0605961	0.0105731	9.97548e-09	7	yes
	ENSG00000198121	LPAR1	9	113718262	ENSG00000084207	GSTP1	11	67352598	0.0571666	0.0104494	4.47989e-08	7	yes
	ENSG00000198121	LPAR1	9	113718262	ENSG00000006534	ALDH3B1	11	67786396	0.0636926	0.0104829	1.23339e-09	8	yes
	ENSG00000198121	LPAR1	9	113718262	ENSG00000137726	FXYD6	11	117727947	0.0691992	0.0104806	4.03937e-11	7	yes
	ENSG00000198121	LPAR1	9	113718262	ENSG00000121316	PLBD1	12	14688939	0.0777938	0.011669	2.61577e-11	5	yes
	ENSG00000198121	LPAR1	9	113718262	ENSG00000111275	ALDH2	12	112226236	0.0962328	0.0112531	1.21287e-17	5	yes
	ENSG00000198121	LPAR1	9	113718262	ENSG00000155465	SLC7A7	14	23270730	0.0650315	0.0105044	5.98266e-10	6	yes
	ENSG00000198121	LPAR1	9	113718262	ENSG00000140090	SLC24A4	14	92875760	0.094309	0.0108964	4.92546e-18	6	yes
	ENSG00000198121	LPAR1	9	113718262	ENSG00000153786	ZDHHC7	16	85026464	0.0612177	0.0104644	4.91346e-09	7	yes
	ENSG00000198121	LPAR1	9	113718262	ENSG00000161944	ASGR2	17	7011830	0.0626854	0.0109159	9.32387e-09	6	yes
	ENSG00000198121	LPAR1	9	113718262	ENSG00000141505	ASGR1	17	7079816	0.0758885	0.0104519	3.84969e-13	8	yes
	ENSG00000198121	LPAR1	9	113718262	ENSG00000121064	SCPEP1	17	55069797	0.074894	0.0104467	7.54717e-13	7	yes
	ENSG00000198121	LPAR1	9	113718262	ENSG00000178789	CD300LB	17	72522463	0.0640428	0.0104486	8.82665e-10	8	yes
	ENSG00000198121	LPAR1	9	113718262	ENSG00000100077	ADRBK2	22	26043037	0.0968388	0.0161469	2.00539e-09	7	yes
	ENSG00000198121	LPAR1	9	113718262	ENSG00000100097	LGALS1	22	38073714	0.0626225	0.010428	1.91081e-09	8	yes
	ENSG00000148346	LCN2	9	130913542	ENSG00000142583	SLC2A5	1	9121851	0.228126	0.0270416	3.28053e-17	6	yes
	ENSG00000148346	LCN2	9	130913542	ENSG00000184292	TACSTD2	1	59042132	0.292437	0.0313659	1.1267e-20	5	yes
	ENSG00000148346	LCN2	9	130913542	ENSG00000133063	CHIT1	1	203212362	0.346072	0.0317281	1.06209e-27	6	yes
	ENSG00000148346	LCN2	9	130913542	ENSG00000012223	LTF	3	46501930	0.565061	0.0345827	5.17582e-60	6	yes
	ENSG00000148346	LCN2	9	130913542	ENSG00000164047	CAMP	3	48265909	0.620051	0.0358762	6.31148e-67	6	yes
	ENSG00000148346	LCN2	9	130913542	ENSG00000163710	PCOLCE2	3	142571404	0.275256	0.0318863	6.0064e-18	5	yes
	ENSG00000148346	LCN2	9	130913542	ENSG00000179869	ABCA13	7	48449073	0.481753	0.0324046	5.41156e-50	5	yes
	ENSG00000148346	LCN2	9	130913542	ENSG00000164821	DEFA4	8	6794602	1.10016	0.0845762	1.10351e-38	4	yes
	ENSG00000148346	LCN2	9	130913542	ENSG00000239839	DEFA3	8	6874607	0.5374	0.0776329	4.44277e-12	5	yes
	ENSG00000148346	LCN2	9	130913542	ENSG00000099194	SCD	10	102115736	0.189354	0.0302987	4.11591e-10	5	yes
	ENSG00000148346	LCN2	9	130913542	ENSG00000065618	COL17A1	10	105818402	0.323294	0.0294157	4.24408e-28	6	yes
	ENSG00000148346	LCN2	9	130913542	ENSG00000134827	TCN1	11	59627160	0.527564	0.0440146	4.20158e-33	6	yes
	ENSG00000148346	LCN2	9	130913542	ENSG00000149516	MS4A3	11	59831330	0.372454	0.0327013	4.71297e-30	6	yes
	ENSG00000148346	LCN2	9	130913542	ENSG00000173391	OLR1	12	10317819	0.514705	0.0328974	3.55288e-55	6	yes
	ENSG00000148346	LCN2	9	130913542	ENSG00000102837	OLFM4	13	53614513	0.541167	0.0336028	2.35937e-58	6	yes
	ENSG00000148346	LCN2	9	130913542	ENSG00000100448	CTSG	14	25044097	0.419884	0.0414085	3.66906e-24	4	yes
	ENSG00000148346	LCN2	9	130913542	ENSG00000172232	AZU1	19	828557	0.359486	0.0385134	1.01904e-20	4	yes
	ENSG00000148346	LCN2	9	130913542	ENSG00000104918	RETN	19	7734632	0.36089	0.0290907	2.43404e-35	6	yes
	ENSG00000148346	LCN2	9	130913542	ENSG00000086548	CEACAM6	19	42265499	0.627136	0.0391859	1.19571e-57	5	yes
	ENSG00000148346	LCN2	9	130913542	ENSG00000268833	AC011513.4	19	42276303	0.421333	0.0624648	1.52894e-11	6	yes
	ENSG00000148346	LCN2	9	130913542	ENSG00000124469	CEACAM8	19	43091800	0.744798	0.0391933	1.60387e-80	6	yes
	ENSG00000148346	LCN2	9	130913542	ENSG00000124469	CEACAM8	19	43091800	0.744798	0.0391933	1.60387e-80	6	yes
	ENSG00000148346	LCN2	9	130913542	ENSG00000248385	TARM1	19	54578891	0.200151	0.0295259	1.2117e-11	6	yes
	ENSG00000148346	LCN2	9	130913542	ENSG00000101425	BPI	20	36927229	0.528833	0.0339678	1.18852e-54	6	yes
	ENSG00000148288	GBGT1	9	136033836	ENSG00000185630	PBX1	1	164696677	0.481814	0.0486676	4.15838e-23	8	yes
	ENSG00000148288	GBGT1	9	136033836	ENSG00000167992	VWCE	11	61044329	1.65809	0.101096	1.87499e-60	7	yes
	ENSG00000148288	GBGT1	9	136033836	ENSG00000140986	RPL3L	16	2000791	0.301043	0.0495007	1.19004e-09	6	yes
	ENSG00000148288	GBGT1	9	136033836	ENSG00000130300	PLVAP	19	17475208	0.59198	0.0584547	4.18583e-24	6	yes
	ENSG00000187796	CARD9	9	139262244	ENSG00000126709	IFI6	1	27995650	-0.108476	0.0136611	2.01331e-15	5	yes
	ENSG00000187796	CARD9	9	139262244	ENSG00000137959	IFI44L	1	79097045	-0.104717	0.0136689	1.84493e-14	5	yes
	ENSG00000187796	CARD9	9	139262244	ENSG00000137965	IFI44	1	79122622	-0.101388	0.0136514	1.11115e-13	5	yes
	ENSG00000187796	CARD9	9	139262244	ENSG00000134321	RSAD2	2	7022153	-0.0900784	0.0136921	4.74096e-11	5	yes
	ENSG00000187796	CARD9	9	139262244	ENSG00000138646	HERC5	4	89402791	-0.112292	0.0136621	2.04764e-16	5	yes
	ENSG00000187796	CARD9	9	139262244	ENSG00000119922	IFIT2	10	91065372	-0.0760502	0.0137954	3.53346e-08	5	yes
	ENSG00000187796	CARD9	9	139262244	ENSG00000119917	IFIT3	10	91094189	-0.0797613	0.0136286	4.84205e-09	5	yes
	ENSG00000187796	CARD9	9	139262244	ENSG00000185745	IFIT1	10	91158024	-0.128711	0.0137182	6.44075e-21	5	yes
	ENSG00000187796	CARD9	9	139262244	ENSG00000111331	OAS3	12	113393605	-0.0775626	0.0136362	1.28546e-08	5	yes
	ENSG00000187796	CARD9	9	139262244	ENSG00000157601	MX1	21	42811686	-0.144107	0.0137496	1.05832e-25	5	yes
	ENSG00000186193	SAPCD2	9	139960810	ENSG00000198574	SH2D1B	1	162373492	-0.189641	0.0338586	2.13172e-08	3	yes
	ENSG00000186193	SAPCD2	9	139960810	ENSG00000150045	KLRF1	12	9988841	-0.253613	0.0347076	2.72912e-13	3	yes
	ENSG00000186193	SAPCD2	9	139960810	ENSG00000100385	IL2RB	22	37546486	-0.205777	0.0335152	8.26229e-10	3	yes
	ENSG00000172661	FAM21C	10	46255528	ENSG00000115758	ODC1	2	10584362	-0.153806	0.0240216	1.52538e-10	3	yes
	ENSG00000172661	FAM21C	10	46255528	ENSG00000174196	ENSG00000174196	10	51189985	1.52281	0.087483	7.31472e-68	3	yes
	ENSG00000172661	FAM21C	10	46255528	ENSG00000099290	FAM21A	10	51860458	-0.372285	0.0525576	1.40681e-12	3	yes
	ENSG00000172661	FAM21C	10	46255528	ENSG00000132819	RBM38	20	55975426	-0.163878	0.0245734	2.57742e-11	3	yes
	ENSG00000174194	AGAP8	10	51298001	ENSG00000188234	AGAP4	10	46335182	-0.441227	0.0551875	1.29518e-15	3	yes
	ENSG00000204169	AGAP7	10	51475244	ENSG00000230869	CTGLF10P	10	46185060	-0.658507	0.0244199	3.7076e-160	3	yes
	ENSG00000138293	NCOA4	10	51577921	ENSG00000230869	CTGLF10P	10	46185060	-1.30241	0.0483501	8.09787e-160	6	yes
	ENSG00000138293	NCOA4	10	51577921	ENSG00000188234	AGAP4	10	46335182	-0.19475	0.034742	2.07542e-08	6	yes
	ENSG00000152804	HHEX	10	94451674	ENSG00000116824	CD2	1	117304428	0.252826	0.0352421	7.28491e-13	5	yes
	ENSG00000152804	HHEX	10	94451674	ENSG00000117281	CD160	1	145705706	-0.679795	0.0527716	5.69564e-38	5	yes
	ENSG00000152804	HHEX	10	94451674	ENSG00000198574	SH2D1B	1	162373492	-0.318632	0.0346737	3.94951e-20	5	yes
	ENSG00000152804	HHEX	10	94451674	ENSG00000198756	COLGALT2	1	183952829	-0.231519	0.0382612	1.43933e-09	5	yes
	ENSG00000152804	HHEX	10	94451674	ENSG00000116679	IVNS1ABP	1	185275990	-0.258321	0.036377	1.23663e-12	4	yes
	ENSG00000152804	HHEX	10	94451674	ENSG00000136630	HLX	1	221055411	-0.283958	0.0354188	1.08207e-15	5	yes
	ENSG00000152804	HHEX	10	94451674	ENSG00000189292	FAM150B	2	284204	-0.248913	0.0349445	1.05523e-12	5	yes
	ENSG00000152804	HHEX	10	94451674	ENSG00000205221	VIT	2	36982884	-0.190403	0.0343033	2.84726e-08	5	yes
	ENSG00000152804	HHEX	10	94451674	ENSG00000115828	QPCT	2	37586091	-0.220869	0.0366121	1.61278e-09	3	yes
	ENSG00000152804	HHEX	10	94451674	ENSG00000114993	RTKN	2	74661256	-0.210729	0.0346095	1.13795e-09	5	yes
	ENSG00000152804	HHEX	10	94451674	ENSG00000115607	IL18RAP	2	103052087	-0.23839	0.0367371	8.63632e-11	3	yes
	ENSG00000152804	HHEX	10	94451674	ENSG00000068024	HDAC4	2	240146606	-0.239788	0.035953	2.56713e-11	4	yes
	ENSG00000152804	HHEX	10	94451674	ENSG00000163508	EOMES	3	27760823	-0.207544	0.0344421	1.68177e-09	5	yes
	ENSG00000152804	HHEX	10	94451674	ENSG00000175066	GK5	3	141913431	-0.278866	0.0508515	4.15978e-08	5	yes
	ENSG00000152804	HHEX	10	94451674	ENSG00000159674	SPON2	4	1181735	-0.468164	0.0349802	7.53073e-41	5	yes
	ENSG00000152804	HHEX	10	94451674	ENSG00000169744	LDB2	4	16701798	-0.191166	0.0343432	2.60142e-08	5	yes
	ENSG00000152804	HHEX	10	94451674	ENSG00000197057	DTHD1	4	36315311	-0.532458	0.0395077	2.12656e-41	5	yes
	ENSG00000152804	HHEX	10	94451674	ENSG00000171476	HOPX	4	57531110	-0.258126	0.0348871	1.3731e-13	5	yes
	ENSG00000152804	HHEX	10	94451674	ENSG00000171476	HOPX	4	57531110	-0.258126	0.0348871	1.3731e-13	5	yes
	ENSG00000152804	HHEX	10	94451674	ENSG00000154556	SORBS2	4	186692202	-0.49106	0.0370818	4.97885e-40	5	yes
	ENSG00000152804	HHEX	10	94451674	ENSG00000164292	RHOBTB3	5	95104656	-0.19717	0.0348711	1.5653e-08	5	yes
	ENSG00000152804	HHEX	10	94451674	ENSG00000171604	CXXC5	5	139045175	-0.268783	0.034122	3.34969e-15	5	yes
	ENSG00000152804	HHEX	10	94451674	ENSG00000135077	HAVCR2	5	156541361	-0.222905	0.035192	2.38969e-10	5	yes
	ENSG00000152804	HHEX	10	94451674	ENSG00000111906	HDDC2	6	125609889	-0.190712	0.0342887	2.66753e-08	5	yes
	ENSG00000152804	HHEX	10	94451674	ENSG00000198719	DLL1	6	170595427	-0.217115	0.0351394	6.46392e-10	5	yes
	ENSG00000152804	HHEX	10	94451674	ENSG00000186088	GSAP	7	76992892	-0.289988	0.0423609	7.6131e-12	5	yes
	ENSG00000152804	HHEX	10	94451674	ENSG00000221869	CEBPD	8	48650559	-0.306079	0.0366221	6.39133e-17	4	yes
	ENSG00000152804	HHEX	10	94451674	ENSG00000173068	BNC2	9	16643622	-0.217436	0.0374967	6.6786e-09	5	yes
	ENSG00000152804	HHEX	10	94451674	ENSG00000174482	LINGO2	9	28309179	-0.215131	0.0344378	4.18511e-10	5	yes
	ENSG00000152804	HHEX	10	94451674	ENSG00000196781	TLE1	9	84251409	-0.22923	0.0343821	2.60832e-11	5	yes
	ENSG00000152804	HHEX	10	94451674	ENSG00000169583	CLIC3	9	139890171	-0.299032	0.0346556	6.20621e-18	5	yes
	ENSG00000152804	HHEX	10	94451674	ENSG00000138311	ZNF365	10	64282861	0.252413	0.035025	5.73473e-13	5	yes
	ENSG00000152804	HHEX	10	94451674	ENSG00000180644	PRF1	10	72359817	-0.196391	0.0344493	1.19205e-08	5	yes
	ENSG00000152804	HHEX	10	94451674	ENSG00000150687	PRSS23	11	86583026	-0.250666	0.0343006	2.713e-13	5	yes
	ENSG00000152804	HHEX	10	94451674	ENSG00000149557	FEZ1	11	125340929	-0.381983	0.0341865	5.49748e-29	5	yes
	ENSG00000152804	HHEX	10	94451674	ENSG00000089692	LAG3	12	6884649	0.245565	0.0371974	4.06516e-11	4	yes
	ENSG00000152804	HHEX	10	94451674	ENSG00000166527	CLEC4D	12	8668516	-0.249016	0.0358109	3.55957e-12	4	yes
	ENSG00000152804	HHEX	10	94451674	ENSG00000166523	CLEC4E	12	8689730	-0.423616	0.0373328	7.67477e-30	5	yes
	ENSG00000152804	HHEX	10	94451674	ENSG00000111796	KLRB1	12	9753814	-0.210908	0.0344734	9.47627e-10	5	yes
	ENSG00000152804	HHEX	10	94451674	ENSG00000150045	KLRF1	12	9988841	-0.308916	0.0344226	2.85355e-19	5	yes
	ENSG00000152804	HHEX	10	94451674	ENSG00000132965	ALOX5AP	13	31324100	-0.327012	0.0375403	3.01289e-18	3	yes
	ENSG00000152804	HHEX	10	94451674	ENSG00000102471	NDFIP2	13	80092748	-0.410275	0.0352058	2.19909e-31	5	yes
	ENSG00000152804	HHEX	10	94451674	ENSG00000136158	SPRY2	13	80912598	-0.299998	0.0359667	7.3669e-17	5	yes
	ENSG00000152804	HHEX	10	94451674	ENSG00000100450	GZMH	14	25077295	0.222205	0.0345911	1.32961e-10	5	yes
	ENSG00000152804	HHEX	10	94451674	ENSG00000168229	PTGDR	14	52738936	-0.227161	0.0350468	9.0721e-11	5	yes
	ENSG00000152804	HHEX	10	94451674	ENSG00000034053	APBA2	15	29270073	-0.190752	0.0349223	4.70332e-08	4	yes
	ENSG00000152804	HHEX	10	94451674	ENSG00000140455	USP3	15	63841816	-0.324414	0.0370326	1.94834e-18	4	yes
	ENSG00000152804	HHEX	10	94451674	ENSG00000008517	IL32	16	3123603	0.235763	0.036623	1.21402e-10	5	yes
	ENSG00000152804	HHEX	10	94451674	ENSG00000169896	ITGAM	16	31307762	-0.257371	0.0367187	2.39581e-12	4	yes
	ENSG00000152804	HHEX	10	94451674	ENSG00000006075	CCL3	17	34416558	-0.671575	0.0647617	3.39747e-25	5	yes
	ENSG00000152804	HHEX	10	94451674	ENSG00000006075	CCL3	17	34416558	-0.671575	0.0647617	3.39747e-25	5	yes
	ENSG00000152804	HHEX	10	94451674	ENSG00000173917	HOXB2	17	46620848	-0.464015	0.0357461	1.57151e-38	5	yes
	ENSG00000152804	HHEX	10	94451674	ENSG00000181045	SLC26A11	17	78210398	0.192748	0.0349517	3.49371e-08	5	yes
	ENSG00000152804	HHEX	10	94451674	ENSG00000141622	RNF165	18	43974937	-0.278406	0.0345862	8.30561e-16	5	yes
	ENSG00000152804	HHEX	10	94451674	ENSG00000244165	P2RY11	19	10224131	-0.265935	0.038151	3.15627e-12	5	yes
	ENSG00000152804	HHEX	10	94451674	ENSG00000197077	KIAA1671	22	25507507	0.242589	0.037786	1.36209e-10	5	yes
	ENSG00000152804	HHEX	10	94451674	ENSG00000225783	MIAT	22	27057415	0.244034	0.0398093	8.78452e-10	5	yes
	ENSG00000152804	HHEX	10	94451674	ENSG00000075234	TTC38	22	46676881	-0.282988	0.0342434	1.40863e-16	5	yes
	ENSG00000152804	HHEX	10	94451674	ENSG00000100427	MLC1	22	50511075	-0.247786	0.0341291	3.86387e-13	5	yes
	ENSG00000165879	FRAT1	10	99080347	ENSG00000134243	SORT1	1	109896382	-0.177006	0.0264994	2.39567e-11	4	yes
	ENSG00000165879	FRAT1	10	99080347	ENSG00000119820	YIPF4	2	32519990	-0.139545	0.0247629	1.74813e-08	6	yes
	ENSG00000165879	FRAT1	10	99080347	ENSG00000138061	CYP1B1	2	38315580	0.171067	0.024932	6.82222e-12	6	yes
	ENSG00000165879	FRAT1	10	99080347	ENSG00000169087	HSPBAP1	3	122485758	-0.204626	0.0278142	1.88236e-13	5	yes
	ENSG00000165879	FRAT1	10	99080347	ENSG00000169429	IL8	4	74607828	-0.197777	0.0294064	1.74798e-11	4	yes
	ENSG00000165879	FRAT1	10	99080347	ENSG00000024862	CCDC28A	6	139104556	-0.268898	0.0258571	2.4956e-25	5	yes
	ENSG00000165879	FRAT1	10	99080347	ENSG00000105856	HBP1	7	106826190	-0.166105	0.0253796	5.95662e-11	5	yes
	ENSG00000165879	FRAT1	10	99080347	ENSG00000013374	NUB1	7	151057160	-0.179675	0.0262092	7.10979e-12	4	yes
	ENSG00000165879	FRAT1	10	99080347	ENSG00000165092	ALDH1A1	9	75605468	0.176557	0.0251329	2.14198e-12	6	yes
	ENSG00000165879	FRAT1	10	99080347	ENSG00000198121	LPAR1	9	113718262	0.199201	0.0265974	6.91399e-14	4	yes
	ENSG00000165879	FRAT1	10	99080347	ENSG00000150593	PDCD4	10	112645664	-0.179553	0.0250007	6.87343e-13	6	yes
	ENSG00000165879	FRAT1	10	99080347	ENSG00000139946	PELI2	14	56676388	-0.178901	0.0248796	6.44811e-13	6	yes
	ENSG00000165879	FRAT1	10	99080347	ENSG00000185262	UBALD2	17	74264329	-0.226305	0.0295601	1.92156e-14	4	yes
	ENSG00000165879	FRAT1	10	99080347	ENSG00000130529	TRPM4	19	49688045	0.154964	0.0248575	4.54358e-10	5	yes
	ENSG00000181274	FRAT2	10	99093356	ENSG00000134243	SORT1	1	109896382	-0.11187	0.0156108	7.71055e-13	4	yes
	ENSG00000181274	FRAT2	10	99093356	ENSG00000138061	CYP1B1	2	38315580	0.114086	0.0152192	6.572e-14	5	yes
	ENSG00000181274	FRAT2	10	99093356	ENSG00000169087	HSPBAP1	3	122485758	-0.108725	0.0168531	1.10881e-10	5	yes
	ENSG00000181274	FRAT2	10	99093356	ENSG00000169429	IL8	4	74607828	-0.122039	0.0173107	1.79042e-12	3	yes
	ENSG00000181274	FRAT2	10	99093356	ENSG00000024862	CCDC28A	6	139104556	-0.166021	0.0152238	1.08685e-27	6	yes
	ENSG00000181274	FRAT2	10	99093356	ENSG00000105856	HBP1	7	106826190	-0.106834	0.0151926	2.0363e-12	6	yes
	ENSG00000181274	FRAT2	10	99093356	ENSG00000013374	NUB1	7	151057160	-0.116676	0.0155412	6.02541e-14	5	yes
	ENSG00000181274	FRAT2	10	99093356	ENSG00000184489	PTP4A3	8	142421856	-0.0860136	0.0156847	4.15979e-08	3	yes
	ENSG00000181274	FRAT2	10	99093356	ENSG00000165092	ALDH1A1	9	75605468	0.118874	0.0153179	8.46283e-15	5	yes
	ENSG00000181274	FRAT2	10	99093356	ENSG00000198121	LPAR1	9	113718262	0.117148	0.015466	3.60391e-14	5	yes
	ENSG00000181274	FRAT2	10	99093356	ENSG00000150593	PDCD4	10	112645664	-0.114377	0.0152435	6.2203e-14	5	yes
	ENSG00000181274	FRAT2	10	99093356	ENSG00000139946	PELI2	14	56676388	-0.130648	0.0152557	1.09149e-17	5	yes
	ENSG00000181274	FRAT2	10	99093356	ENSG00000185262	UBALD2	17	74264329	-0.122752	0.0168184	2.90711e-13	6	yes
	ENSG00000181274	FRAT2	10	99093356	ENSG00000130529	TRPM4	19	49688045	0.103854	0.0151769	7.76054e-12	6	yes
	ENSG00000181274	FRAT2	10	99093356	ENSG00000125810	CD93	20	23063481	0.0880327	0.0155127	1.38776e-08	5	yes
	ENSG00000052749	RRP12	10	99138621	ENSG00000134243	SORT1	1	109896382	-0.0679518	0.010193	2.61969e-11	5	yes
	ENSG00000052749	RRP12	10	99138621	ENSG00000119820	YIPF4	2	32519990	-0.0577601	0.0101444	1.24241e-08	7	yes
	ENSG00000052749	RRP12	10	99138621	ENSG00000138061	CYP1B1	2	38315580	0.0750937	0.0101404	1.30788e-13	7	yes
	ENSG00000052749	RRP12	10	99138621	ENSG00000169087	HSPBAP1	3	122485758	-0.0694358	0.0110674	3.52148e-10	7	yes
	ENSG00000052749	RRP12	10	99138621	ENSG00000169429	IL8	4	74607828	-0.0789379	0.0113662	3.78469e-12	4	yes
	ENSG00000052749	RRP12	10	99138621	ENSG00000024862	CCDC28A	6	139104556	-0.113101	0.0102384	2.27264e-28	6	yes
	ENSG00000052749	RRP12	10	99138621	ENSG00000105856	HBP1	7	106826190	-0.070744	0.0101892	3.83679e-12	8	yes
	ENSG00000052749	RRP12	10	99138621	ENSG00000013374	NUB1	7	151057160	-0.07592	0.0102595	1.36234e-13	6	yes
	ENSG00000052749	RRP12	10	99138621	ENSG00000165092	ALDH1A1	9	75605468	0.0680934	0.0101541	2.00047e-11	7	yes
	ENSG00000052749	RRP12	10	99138621	ENSG00000198121	LPAR1	9	113718262	0.073342	0.0101679	5.47073e-13	6	yes
	ENSG00000052749	RRP12	10	99138621	ENSG00000150593	PDCD4	10	112645664	-0.0771629	0.0101556	3.00576e-14	8	yes
	ENSG00000052749	RRP12	10	99138621	ENSG00000139946	PELI2	14	56676388	-0.0822912	0.0101198	4.23292e-16	8	yes
	ENSG00000052749	RRP12	10	99138621	ENSG00000185262	UBALD2	17	74264329	-0.0855385	0.0112805	3.38012e-14	7	yes
	ENSG00000052749	RRP12	10	99138621	ENSG00000130529	TRPM4	19	49688045	0.0632941	0.0101097	3.83174e-10	7	yes
	ENSG00000052749	RRP12	10	99138621	ENSG00000125810	CD93	20	23063481	0.0566704	0.0102528	3.25214e-08	6	yes
	ENSG00000243628	ENSG00000243628	10	104225999	ENSG00000134668	SPOCD1	1	32268837	-0.0593595	0.010009	3.01777e-09	5	yes
	ENSG00000243628	ENSG00000243628	10	104225999	ENSG00000143595	AQP10	1	154295683	0.0559563	0.00999614	2.17093e-08	5	yes
	ENSG00000243628	ENSG00000243628	10	104225999	ENSG00000154917	RAB6B	3	133578881	0.0579108	0.0100693	8.86055e-09	5	yes
	ENSG00000171206	TRIM8	10	104411164	ENSG00000134668	SPOCD1	1	32268837	0.176307	0.0308978	1.15578e-08	4	yes
	ENSG00000171206	TRIM8	10	104411164	ENSG00000203813	HIST1H3H	6	27778078	0.18163	0.0310258	4.79418e-09	4	yes
	ENSG00000171206	TRIM8	10	104411164	ENSG00000101335	MYL9	20	35174057	-0.18312	0.030815	2.80638e-09	4	yes
	ENSG00000166275	C10orf32	10	104623485	ENSG00000134668	SPOCD1	1	32268837	-0.242984	0.0320841	3.63771e-14	5	yes
	ENSG00000188076	SCGB1C1	11	193826	ENSG00000223972	DDX11L1	1	13140	0.366492	0.0444725	1.70971e-16	3	yes
	ENSG00000188076	SCGB1C1	11	193826	ENSG00000134668	SPOCD1	1	32268837	-0.115823	0.0190041	1.09712e-09	3	yes
	ENSG00000188076	SCGB1C1	11	193826	ENSG00000143595	AQP10	1	154295683	0.142977	0.0190479	6.08805e-14	3	yes
	ENSG00000188076	SCGB1C1	11	193826	ENSG00000187800	PEAR1	1	156874858	0.142401	0.0191673	1.09118e-13	3	yes
	ENSG00000188076	SCGB1C1	11	193826	ENSG00000174175	SELP	1	169578759	0.224546	0.0198955	1.5339e-29	3	yes
	ENSG00000188076	SCGB1C1	11	193826	ENSG00000197959	DNM3	1	172099113	0.180904	0.0198616	8.37167e-20	3	yes
	ENSG00000188076	SCGB1C1	11	193826	ENSG00000117592	PRDX6	1	173452175	0.129973	0.0192314	1.39532e-11	3	yes
	ENSG00000188076	SCGB1C1	11	193826	ENSG00000117691	NENF	1	212612971	0.106068	0.0193647	4.31617e-08	3	yes
	ENSG00000188076	SCGB1C1	11	193826	ENSG00000143811	PYCR2	1	226109778	0.115711	0.0189848	1.09488e-09	3	yes
	ENSG00000188076	SCGB1C1	11	193826	ENSG00000119280	C1orf198	1	230989100	0.159491	0.0197064	5.80496e-16	3	yes
	ENSG00000188076	SCGB1C1	11	193826	ENSG00000115758	ODC1	2	10584362	0.127545	0.0193635	4.49228e-11	3	yes
	ENSG00000188076	SCGB1C1	11	193826	ENSG00000013016	EHD3	2	31474596	0.132324	0.0194713	1.07654e-11	3	yes
	ENSG00000188076	SCGB1C1	11	193826	ENSG00000049323	LTBP1	2	33398307	0.110597	0.0192144	8.61642e-09	3	yes
	ENSG00000188076	SCGB1C1	11	193826	ENSG00000119862	LGALSL	2	64684809	0.18312	0.0194711	5.21642e-21	3	yes
	ENSG00000188076	SCGB1C1	11	193826	ENSG00000169756	LIMS1	2	109227279	0.168106	0.0198258	2.26874e-17	3	yes
	ENSG00000188076	SCGB1C1	11	193826	ENSG00000061676	NCKAP1	2	183846595	0.109932	0.0190807	8.34113e-09	3	yes
	ENSG00000188076	SCGB1C1	11	193826	ENSG00000168497	SDPR	2	192705504	0.156771	0.0189641	1.37721e-16	3	yes
	ENSG00000188076	SCGB1C1	11	193826	ENSG00000229754	CXCR2P1	2	218927165	0.116838	0.0205994	1.4121e-08	3	yes
	ENSG00000188076	SCGB1C1	11	193826	ENSG00000163359	COL6A3	2	238277832	0.110987	0.0190237	5.40643e-09	3	yes
	ENSG00000188076	SCGB1C1	11	193826	ENSG00000088726	TMEM40	3	12792990	0.113144	0.0196852	9.0472e-09	3	yes
	ENSG00000188076	SCGB1C1	11	193826	ENSG00000144677	CTDSPL	3	37964705	0.267852	0.0204596	3.6684e-39	3	yes
	ENSG00000188076	SCGB1C1	11	193826	ENSG00000184500	PROS1	3	93642395	0.266613	0.0322055	1.24725e-16	3	yes
	ENSG00000188076	SCGB1C1	11	193826	ENSG00000065534	MYLK	3	123466037	0.116292	0.01935	1.8563e-09	3	yes
	ENSG00000188076	SCGB1C1	11	193826	ENSG00000082781	ITGB5	3	124543734	0.162781	0.0190362	1.21913e-17	3	yes
	ENSG00000188076	SCGB1C1	11	193826	ENSG00000074416	MGLL	3	127474980	0.211412	0.0193063	6.61514e-28	3	yes
	ENSG00000188076	SCGB1C1	11	193826	ENSG00000169704	GP9	3	128780429	0.292877	0.019808	1.80833e-49	3	yes
	ENSG00000188076	SCGB1C1	11	193826	ENSG00000154917	RAB6B	3	133578881	0.128816	0.0197058	6.27937e-11	3	yes
	ENSG00000188076	SCGB1C1	11	193826	ENSG00000152952	PLOD2	3	145834333	0.142467	0.0195539	3.19638e-13	3	yes
	ENSG00000188076	SCGB1C1	11	193826	ENSG00000163737	PF4	4	74847317	0.181427	0.0198268	5.66314e-20	3	yes
	ENSG00000188076	SCGB1C1	11	193826	ENSG00000163736	PPBP	4	74853334	0.355996	0.0205322	2.41143e-67	3	yes
	ENSG00000188076	SCGB1C1	11	193826	ENSG00000163735	CXCL5	4	74862927	0.112158	0.0190541	3.94889e-09	3	yes
	ENSG00000188076	SCGB1C1	11	193826	ENSG00000138722	MMRN1	4	90838231	0.304584	0.0190712	2.03966e-57	3	yes
	ENSG00000188076	SCGB1C1	11	193826	ENSG00000138798	EGF	4	110883731	0.114316	0.0190223	1.85975e-09	3	yes
	ENSG00000188076	SCGB1C1	11	193826	ENSG00000164116	GUCY1A3	4	156620682	0.194024	0.0198515	1.45909e-22	3	yes
	ENSG00000188076	SCGB1C1	11	193826	ENSG00000061918	GUCY1B3	4	156704443	0.207172	0.0201313	7.73342e-25	3	yes
	ENSG00000188076	SCGB1C1	11	193826	ENSG00000164181	ELOVL7	5	60093917	0.15979	0.0193867	1.69009e-16	3	yes
	ENSG00000188076	SCGB1C1	11	193826	ENSG00000173210	ABLIM3	5	148580575	0.22357	0.0198879	2.55013e-29	3	yes
	ENSG00000188076	SCGB1C1	11	193826	ENSG00000170271	FAXDC2	5	154218431	0.108649	0.0189775	1.03347e-08	3	yes
	ENSG00000188076	SCGB1C1	11	193826	ENSG00000176783	RUFY1	5	179007293	0.128555	0.0192038	2.16759e-11	3	yes
	ENSG00000188076	SCGB1C1	11	193826	ENSG00000161911	TREML1	6	41119577	0.213496	0.0194277	4.30469e-28	3	yes
	ENSG00000188076	SCGB1C1	11	193826	ENSG00000171611	PTCRA	6	42888650	0.262077	0.0198228	6.63769e-40	3	yes
	ENSG00000188076	SCGB1C1	11	193826	ENSG00000198478	SH3BGRL2	6	80377186	0.252575	0.019187	1.41617e-39	3	yes
	ENSG00000188076	SCGB1C1	11	193826	ENSG00000180354	C7orf41	7	30188402	0.152452	0.0189784	9.51857e-16	3	yes
	ENSG00000188076	SCGB1C1	11	193826	ENSG00000127920	GNG11	7	93553421	0.234595	0.0198197	2.52977e-32	3	yes
	ENSG00000188076	SCGB1C1	11	193826	ENSG00000005249	PRKAR2B	7	106743675	0.114772	0.0193654	3.09179e-09	3	yes
	ENSG00000188076	SCGB1C1	11	193826	ENSG00000158457	TSPAN33	7	128796691	0.235372	0.0195711	2.579e-33	3	yes
	ENSG00000188076	SCGB1C1	11	193826	ENSG00000120885	CLU	8	27463491	0.124582	0.0194053	1.36286e-10	3	yes
	ENSG00000188076	SCGB1C1	11	193826	ENSG00000205038	PKHD1L1	8	110458632	0.107821	0.0192887	2.27258e-08	3	yes
	ENSG00000188076	SCGB1C1	11	193826	ENSG00000169398	PTK2	8	141840157	0.11018	0.0189903	6.55613e-09	3	yes
	ENSG00000188076	SCGB1C1	11	193826	ENSG00000137076	TLN1	9	35714668	0.107307	0.018993	1.60619e-08	3	yes
	ENSG00000188076	SCGB1C1	11	193826	ENSG00000172159	FRMD3	9	86005683	-0.142907	0.0190436	6.17948e-14	3	yes
	ENSG00000188076	SCGB1C1	11	193826	ENSG00000081377	CDC14B	9	99317317	0.167658	0.0191051	1.70035e-18	3	yes
	ENSG00000188076	SCGB1C1	11	193826	ENSG00000148175	STOM	9	124116943	0.112665	0.0193199	5.49198e-09	3	yes
	ENSG00000188076	SCGB1C1	11	193826	ENSG00000148426	PROSER2	10	11889807	0.121526	0.019759	7.72965e-10	3	yes
	ENSG00000188076	SCGB1C1	11	193826	ENSG00000099256	PRTFDC1	10	25189534	0.112189	0.0189761	3.37723e-09	3	yes
	ENSG00000188076	SCGB1C1	11	193826	ENSG00000035403	VCL	10	75818895	0.18644	0.0189515	7.74504e-23	3	yes
	ENSG00000188076	SCGB1C1	11	193826	ENSG00000107438	PDLIM1	10	97024055	0.178079	0.0189867	6.65232e-21	3	yes
	ENSG00000188076	SCGB1C1	11	193826	ENSG00000108039	XPNPEP1	10	111653917	0.114363	0.0193207	3.23558e-09	3	yes
	ENSG00000188076	SCGB1C1	11	193826	ENSG00000166333	ILK	11	6628531	0.182384	0.0191406	1.59349e-21	3	yes
	ENSG00000188076	SCGB1C1	11	193826	ENSG00000149781	FERMT3	11	63982752	0.158331	0.0191032	1.14976e-16	3	yes
	ENSG00000188076	SCGB1C1	11	193826	ENSG00000149218	ENDOD1	11	94844391	0.18129	0.0191043	2.32108e-21	3	yes
	ENSG00000188076	SCGB1C1	11	193826	ENSG00000154146	NRGN	11	124613849	0.230362	0.0190222	9.33059e-34	3	yes
	ENSG00000188076	SCGB1C1	11	193826	ENSG00000149564	ESAM	11	124627106	0.261399	0.020277	5.02864e-38	3	yes
	ENSG00000188076	SCGB1C1	11	193826	ENSG00000166086	JAM3	11	133980358	0.143262	0.0190344	5.21384e-14	3	yes
	ENSG00000188076	SCGB1C1	11	193826	ENSG00000011105	TSPAN9	12	3291125	0.235081	0.0194561	1.30469e-33	3	yes
	ENSG00000188076	SCGB1C1	11	193826	ENSG00000110799	VWF	12	6145988	0.171102	0.0195242	1.89169e-18	3	yes
	ENSG00000188076	SCGB1C1	11	193826	ENSG00000010278	CD9	12	6328153	0.147369	0.0190466	1.01548e-14	3	yes
	ENSG00000188076	SCGB1C1	11	193826	ENSG00000165682	CLEC1B	12	10152132	0.235384	0.0198145	1.51442e-32	3	yes
	ENSG00000188076	SCGB1C1	11	193826	ENSG00000134548	C12orf39	12	21684776	0.20705	0.0341594	1.35028e-09	3	yes
	ENSG00000188076	SCGB1C1	11	193826	ENSG00000177119	ANO6	12	45721978	0.155205	0.0189737	2.83852e-16	3	yes
	ENSG00000188076	SCGB1C1	11	193826	ENSG00000167553	TUBA1C	12	49624816	0.199483	0.0215764	2.34321e-20	3	yes
	ENSG00000188076	SCGB1C1	11	193826	ENSG00000111328	CDK2AP1	12	123751204	0.118225	0.0215859	4.32708e-08	3	yes
	ENSG00000188076	SCGB1C1	11	193826	ENSG00000132970	WASF3	13	27197462	0.195084	0.0195795	2.19743e-23	3	yes
	ENSG00000188076	SCGB1C1	11	193826	ENSG00000125257	ABCC4	13	95812885	0.118901	0.0190016	3.91338e-10	3	yes
	ENSG00000188076	SCGB1C1	11	193826	ENSG00000166091	CMTM5	14	23847499	0.252725	0.0196419	6.93311e-38	3	yes
	ENSG00000188076	SCGB1C1	11	193826	ENSG00000072042	RDH11	14	68153024	0.116922	0.0193694	1.5759e-09	3	yes
	ENSG00000188076	SCGB1C1	11	193826	ENSG00000156381	ANKRD9	14	102974657	0.116451	0.0192621	1.48826e-09	3	yes
	ENSG00000188076	SCGB1C1	11	193826	ENSG00000137801	THBS1	15	39882473	0.195884	0.019463	7.93521e-24	3	yes
	ENSG00000188076	SCGB1C1	11	193826	ENSG00000166831	RBPMS2	15	65049938	0.244702	0.0189632	4.27053e-38	3	yes
	ENSG00000188076	SCGB1C1	11	193826	ENSG00000103740	ACSBG1	15	78498920	0.187782	0.0192482	1.74192e-22	3	yes
	ENSG00000188076	SCGB1C1	11	193826	ENSG00000103942	HOMER2	15	83582249	0.192105	0.0189608	3.99586e-24	3	yes
	ENSG00000188076	SCGB1C1	11	193826	ENSG00000140479	PCSK6	15	101953111	0.140092	0.0195939	8.69031e-13	3	yes
	ENSG00000188076	SCGB1C1	11	193826	ENSG00000248472	DDX11L9	15	102518028	0.342765	0.0422805	5.19121e-16	3	yes
	ENSG00000188076	SCGB1C1	11	193826	ENSG00000103184	SEC14L5	16	5038738	0.220254	0.0191996	1.82822e-30	3	yes
	ENSG00000188076	SCGB1C1	11	193826	ENSG00000140682	TGFB1I1	16	31486093	0.137634	0.0192879	9.62495e-13	3	yes
	ENSG00000188076	SCGB1C1	11	193826	ENSG00000087237	CETP	16	57006759	0.156207	0.0195204	1.22181e-15	3	yes
	ENSG00000188076	SCGB1C1	11	193826	ENSG00000140859	KIFC3	16	57844543	0.138535	0.0190731	3.77558e-13	3	yes
	ENSG00000188076	SCGB1C1	11	193826	ENSG00000185245	GP1BA	17	4836958	0.255117	0.0197204	2.79316e-38	3	yes
	ENSG00000188076	SCGB1C1	11	193826	ENSG00000108839	ALOX12	17	6906719	0.233428	0.0194225	2.84296e-33	3	yes
	ENSG00000188076	SCGB1C1	11	193826	ENSG00000205309	NT5M	17	17228813	0.112133	0.0191021	4.35308e-09	3	yes
	ENSG00000188076	SCGB1C1	11	193826	ENSG00000005961	ITGA2B	17	42458210	0.260345	0.0190282	1.29949e-42	3	yes
	ENSG00000188076	SCGB1C1	11	193826	ENSG00000259207	ITGB3	17	45376435	0.362239	0.0320221	1.14245e-29	3	yes
	ENSG00000188076	SCGB1C1	11	193826	ENSG00000167100	SAMD14	17	48197325	0.23175	0.0190944	6.71701e-34	3	yes
	ENSG00000188076	SCGB1C1	11	193826	ENSG00000108846	ABCC3	17	48740875	0.162085	0.0191781	2.87385e-17	3	yes
	ENSG00000188076	SCGB1C1	11	193826	ENSG00000108387	45539	17	56607895	0.178291	0.0197723	1.92925e-19	3	yes
	ENSG00000188076	SCGB1C1	11	193826	ENSG00000041353	RAB27B	18	52473919	0.260054	0.0208023	7.35184e-36	3	yes
	ENSG00000188076	SCGB1C1	11	193826	ENSG00000141873	SLC39A3	19	2736176	0.112099	0.0194357	8.03592e-09	3	yes
	ENSG00000188076	SCGB1C1	11	193826	ENSG00000129355	CDKN2D	19	10678436	0.11663	0.0189907	8.17985e-10	3	yes
	ENSG00000188076	SCGB1C1	11	193826	ENSG00000127533	F2RL3	19	17001544	0.114903	0.0194425	3.42364e-09	3	yes
	ENSG00000188076	SCGB1C1	11	193826	ENSG00000167641	PPP1R14A	19	38744554	0.139324	0.018994	2.21412e-13	3	yes
	ENSG00000188076	SCGB1C1	11	193826	ENSG00000105507	CABP5	19	48540260	0.183274	0.0191761	1.20678e-21	3	yes
	ENSG00000188076	SCGB1C1	11	193826	ENSG00000088053	GP6	19	55537352	0.283688	0.0330171	8.5355e-18	3	yes
	ENSG00000188076	SCGB1C1	11	193826	ENSG00000185052	SLC24A3	20	19448435	0.210111	0.0199082	4.86917e-26	3	yes
	ENSG00000188076	SCGB1C1	11	193826	ENSG00000101335	MYL9	20	35174057	0.189841	0.0193678	1.10517e-22	3	yes
	ENSG00000188076	SCGB1C1	11	193826	ENSG00000101082	SLA2	20	35257670	0.120543	0.0190027	2.24622e-10	3	yes
	ENSG00000188076	SCGB1C1	11	193826	ENSG00000197122	SRC	20	36003770	0.164435	0.0196425	5.69417e-17	3	yes
	ENSG00000188076	SCGB1C1	11	193826	ENSG00000101470	TNNC2	20	44457118	0.107003	0.0189775	1.71641e-08	3	yes
	ENSG00000188076	SCGB1C1	11	193826	ENSG00000064601	CTSA	20	44523525	0.11581	0.0193728	2.25928e-09	3	yes
	ENSG00000188076	SCGB1C1	11	193826	ENSG00000240849	TMEM189	20	48733999	0.104852	0.0190821	3.91268e-08	3	yes
	ENSG00000188076	SCGB1C1	11	193826	ENSG00000101162	TUBB1	20	57598009	0.1777	0.019752	2.32959e-19	3	yes
	ENSG00000188076	SCGB1C1	11	193826	ENSG00000182093	WRB	21	40776312	0.129031	0.0190101	1.14109e-11	3	yes
	ENSG00000188076	SCGB1C1	11	193826	ENSG00000184702	45540	22	19707141	0.214695	0.019189	4.64568e-29	3	yes
	ENSG00000188076	SCGB1C1	11	193826	ENSG00000128266	GNAZ	22	23439882	0.160319	0.0191217	5.10935e-17	3	yes
	ENSG00000188076	SCGB1C1	11	193826	ENSG00000188677	PARVB	22	44480098	0.279326	0.018908	2.19256e-49	3	yes
	ENSG00000174885	NLRP6	11	281862	ENSG00000227232	WASH7P	1	22084	0.690977	0.0900056	1.62792e-14	3	yes
	ENSG00000174885	NLRP6	11	281862	ENSG00000174175	SELP	1	169578759	-0.457399	0.0407079	2.71029e-29	3	yes
	ENSG00000174885	NLRP6	11	281862	ENSG00000117592	PRDX6	1	173452175	-0.226538	0.0405102	2.24314e-08	3	yes
	ENSG00000174885	NLRP6	11	281862	ENSG00000115758	ODC1	2	10584362	-0.307863	0.0423161	3.45649e-13	3	yes
	ENSG00000174885	NLRP6	11	281862	ENSG00000119862	LGALSL	2	64684809	-0.365191	0.0458644	1.68716e-15	3	yes
	ENSG00000174885	NLRP6	11	281862	ENSG00000146556	WASH2P	2	114349159	0.765715	0.0953823	9.91935e-16	3	yes
	ENSG00000174885	NLRP6	11	281862	ENSG00000061676	NCKAP1	2	183846595	-0.231474	0.0407815	1.37908e-08	3	yes
	ENSG00000174885	NLRP6	11	281862	ENSG00000168497	SDPR	2	192705504	-0.301873	0.0403389	7.24062e-14	3	yes
	ENSG00000174885	NLRP6	11	281862	ENSG00000135919	SERPINE2	2	224871932	-0.255078	0.04122	6.08552e-10	3	yes
	ENSG00000174885	NLRP6	11	281862	ENSG00000163359	COL6A3	2	238277832	-0.255866	0.0412549	5.57228e-10	3	yes
	ENSG00000174885	NLRP6	11	281862	ENSG00000163430	FSTL1	3	120140620	-0.299031	0.0451816	3.63035e-11	3	yes
	ENSG00000174885	NLRP6	11	281862	ENSG00000065534	MYLK	3	123466037	-0.235866	0.0416375	1.47237e-08	3	yes
	ENSG00000174885	NLRP6	11	281862	ENSG00000154917	RAB6B	3	133578881	-0.248041	0.0414064	2.09315e-09	3	yes
	ENSG00000174885	NLRP6	11	281862	ENSG00000163737	PF4	4	74847317	-0.377333	0.0443936	1.90057e-17	3	yes
	ENSG00000174885	NLRP6	11	281862	ENSG00000138798	EGF	4	110883731	-0.233859	0.0403483	6.79152e-09	3	yes
	ENSG00000174885	NLRP6	11	281862	ENSG00000164116	GUCY1A3	4	156620682	-0.38302	0.0408179	6.37365e-21	3	yes
	ENSG00000174885	NLRP6	11	281862	ENSG00000164181	ELOVL7	5	60093917	-0.341132	0.0444619	1.68747e-14	3	yes
	ENSG00000174885	NLRP6	11	281862	ENSG00000005249	PRKAR2B	7	106743675	-0.295769	0.0420392	1.98485e-12	3	yes
	ENSG00000174885	NLRP6	11	281862	ENSG00000122786	CALD1	7	134542241	-0.482933	0.0413279	1.51344e-31	3	yes
	ENSG00000174885	NLRP6	11	281862	ENSG00000120885	CLU	8	27463491	-0.262415	0.0420846	4.50592e-10	3	yes
	ENSG00000174885	NLRP6	11	281862	ENSG00000205038	PKHD1L1	8	110458632	-0.309197	0.0423417	2.8265e-13	3	yes
	ENSG00000174885	NLRP6	11	281862	ENSG00000169398	PTK2	8	141840157	-0.263547	0.0419209	3.2417e-10	3	yes
	ENSG00000174885	NLRP6	11	281862	ENSG00000108039	XPNPEP1	10	111653917	-0.234434	0.0415814	1.72093e-08	3	yes
	ENSG00000174885	NLRP6	11	281862	ENSG00000196611	MMP1	11	102664771	-0.229683	0.0408483	1.87861e-08	3	yes
	ENSG00000174885	NLRP6	11	281862	ENSG00000149564	ESAM	11	124627106	-0.467794	0.0417529	3.90306e-29	3	yes
	ENSG00000174885	NLRP6	11	281862	ENSG00000134548	C12orf39	12	21684776	-0.448726	0.0811628	3.22589e-08	3	yes
	ENSG00000174885	NLRP6	11	281862	ENSG00000167553	TUBA1C	12	49624816	-0.352233	0.0495722	1.19928e-12	3	yes
	ENSG00000174885	NLRP6	11	281862	ENSG00000156381	ANKRD9	14	102974657	-0.25788	0.0416381	5.88961e-10	3	yes
	ENSG00000174885	NLRP6	11	281862	ENSG00000156206	C15orf26	15	81370445	-0.384133	0.0407316	4.06837e-21	3	yes
	ENSG00000174885	NLRP6	11	281862	ENSG00000185596	WASH3P	15	102509062	0.591773	0.0898954	4.61316e-11	3	yes
	ENSG00000174885	NLRP6	11	281862	ENSG00000248472	DDX11L9	15	102518028	-0.691616	0.0989502	2.75798e-12	3	yes
	ENSG00000174885	NLRP6	11	281862	ENSG00000140682	TGFB1I1	16	31486093	-0.293254	0.0422657	3.9667e-12	3	yes
	ENSG00000174885	NLRP6	11	281862	ENSG00000087237	CETP	16	57006759	-0.253022	0.0407015	5.08263e-10	3	yes
	ENSG00000174885	NLRP6	11	281862	ENSG00000140859	KIFC3	16	57844543	-0.248712	0.0412353	1.62416e-09	3	yes
	ENSG00000174885	NLRP6	11	281862	ENSG00000205309	NT5M	17	17228813	-0.234344	0.0414577	1.58034e-08	3	yes
	ENSG00000174885	NLRP6	11	281862	ENSG00000108576	SLC6A4	17	28542178	-0.351533	0.040478	3.80269e-18	3	yes
	ENSG00000174885	NLRP6	11	281862	ENSG00000167100	SAMD14	17	48197325	-0.430073	0.0420503	1.49196e-24	3	yes
	ENSG00000174885	NLRP6	11	281862	ENSG00000105507	CABP5	19	48540260	-0.347781	0.0424496	2.55228e-16	3	yes
	ENSG00000174885	NLRP6	11	281862	ENSG00000088053	GP6	19	55537352	-0.406011	0.0602299	1.57284e-11	3	yes
	ENSG00000174885	NLRP6	11	281862	ENSG00000185052	SLC24A3	20	19448435	-0.414061	0.0430262	6.36525e-22	3	yes
	ENSG00000174885	NLRP6	11	281862	ENSG00000124145	SDC4	20	43965496	-0.241799	0.0409548	3.5469e-09	3	yes
	ENSG00000174885	NLRP6	11	281862	ENSG00000182093	WRB	21	40776312	-0.297091	0.0406267	2.61834e-13	3	yes
	ENSG00000174885	NLRP6	11	281862	ENSG00000128266	GNAZ	22	23439882	-0.250019	0.0404278	6.23615e-10	3	yes
	ENSG00000174885	NLRP6	11	281862	ENSG00000185340	GAS2L1	22	29705673	-0.243943	0.0416306	4.63708e-09	3	yes
	ENSG00000251661	RP11-326C3.11	11	322135	ENSG00000000938	FGR	1	27950181	-0.105461	0.0153996	7.47462e-12	3	yes
	ENSG00000251661	RP11-326C3.11	11	322135	ENSG00000196182	STK40	1	36828361	-0.0852122	0.0154473	3.46198e-08	3	yes
	ENSG00000251661	RP11-326C3.11	11	322135	ENSG00000117862	TXNDC12	1	52503823	-0.250342	0.0161827	5.55715e-54	3	yes
	ENSG00000251661	RP11-326C3.11	11	322135	ENSG00000116604	MEF2D	1	156452069	-0.0934271	0.0154865	1.61119e-09	3	yes
	ENSG00000251661	RP11-326C3.11	11	322135	ENSG00000073756	PTGS2	1	186645241	-0.0850287	0.0154681	3.86204e-08	3	yes
	ENSG00000251661	RP11-326C3.11	11	322135	ENSG00000236562	RP11-396M11.1	4	66960044	-0.338182	0.0282904	6.19101e-33	3	yes
	ENSG00000251661	RP11-326C3.11	11	322135	ENSG00000100605	ITPK1	14	93492962	-0.100591	0.0154059	6.6047e-11	3	yes
	ENSG00000251661	RP11-326C3.11	11	322135	ENSG00000167851	CD300A	17	72471744	-0.105924	0.0154295	6.64872e-12	3	yes
	ENSG00000251661	RP11-326C3.11	11	322135	ENSG00000186074	CD300LF	17	72699784	-0.0993685	0.0155014	1.45254e-10	3	yes
	ENSG00000251661	RP11-326C3.11	11	322135	ENSG00000079385	CEACAM1	19	43038421	-0.132609	0.0155256	1.32758e-17	3	yes
	ENSG00000142089	IFITM3	11	323603	ENSG00000000938	FGR	1	27950181	-0.131079	0.0199017	4.50955e-11	4	yes
	ENSG00000142089	IFITM3	11	323603	ENSG00000196182	STK40	1	36828361	-0.110663	0.020017	3.23039e-08	4	yes
	ENSG00000142089	IFITM3	11	323603	ENSG00000117862	TXNDC12	1	52503823	-0.343772	0.0204834	3.25459e-63	5	yes
	ENSG00000142089	IFITM3	11	323603	ENSG00000116604	MEF2D	1	156452069	-0.136825	0.0199585	7.10803e-12	5	yes
	ENSG00000142089	IFITM3	11	323603	ENSG00000236562	RP11-396M11.1	4	66960044	-0.442876	0.0377765	9.64805e-32	4	yes
	ENSG00000142089	IFITM3	11	323603	ENSG00000196114	ENSG00000196114	6	34544234	-0.341199	0.038346	5.69073e-19	5	yes
	ENSG00000142089	IFITM3	11	323603	ENSG00000100605	ITPK1	14	93492962	-0.125342	0.0198889	2.93613e-10	4	yes
	ENSG00000142089	IFITM3	11	323603	ENSG00000167851	CD300A	17	72471744	-0.145154	0.0198441	2.57884e-13	5	yes
	ENSG00000142089	IFITM3	11	323603	ENSG00000186074	CD300LF	17	72699784	-0.132068	0.0201103	5.12767e-11	4	yes
	ENSG00000142089	IFITM3	11	323603	ENSG00000079385	CEACAM1	19	43038421	-0.166409	0.0197775	3.95959e-17	5	yes
	ENSG00000177697	CD151	11	836337	ENSG00000143595	AQP10	1	154295683	0.549908	0.0508439	2.90387e-27	7	yes
	ENSG00000177697	CD151	11	836337	ENSG00000187800	PEAR1	1	156874858	1.01623	0.0854309	1.25101e-32	6	yes
	ENSG00000177697	CD151	11	836337	ENSG00000168497	SDPR	2	192705504	0.662537	0.0530744	9.22337e-36	8	yes
	ENSG00000177697	CD151	11	836337	ENSG00000144677	CTDSPL	3	37964705	1.7416	0.0908897	7.72729e-82	6	yes
	ENSG00000177697	CD151	11	836337	ENSG00000082781	ITGB5	3	124543734	1.04913	0.0665586	5.64079e-56	7	yes
	ENSG00000177697	CD151	11	836337	ENSG00000074416	MGLL	3	127474980	0.869901	0.0558089	8.90325e-55	8	yes
	ENSG00000177697	CD151	11	836337	ENSG00000169704	GP9	3	128780429	0.404211	0.0517496	5.67851e-15	7	yes
	ENSG00000177697	CD151	11	836337	ENSG00000154917	RAB6B	3	133578881	0.491438	0.0451975	1.54792e-27	10	yes
	ENSG00000177697	CD151	11	836337	ENSG00000163735	CXCL5	4	74862927	0.507232	0.0507115	1.4887e-23	7	yes
	ENSG00000177697	CD151	11	836337	ENSG00000164116	GUCY1A3	4	156620682	0.682365	0.0627093	1.41379e-27	7	yes
	ENSG00000177697	CD151	11	836337	ENSG00000061918	GUCY1B3	4	156704443	0.336949	0.0498443	1.37955e-11	7	yes
	ENSG00000177697	CD151	11	836337	ENSG00000173210	ABLIM3	5	148580575	1.06932	0.0710753	3.72633e-51	5	yes
	ENSG00000177697	CD151	11	836337	ENSG00000113140	SPARC	5	151053691	1.443	0.0880926	2.63449e-60	5	yes
	ENSG00000177697	CD151	11	836337	ENSG00000161911	TREML1	6	41119577	1.15005	0.0726787	2.13275e-56	6	yes
	ENSG00000177697	CD151	11	836337	ENSG00000180354	C7orf41	7	30188402	1.42935	0.153395	1.18491e-20	3	yes
	ENSG00000177697	CD151	11	836337	ENSG00000158457	TSPAN33	7	128796691	0.454798	0.0686331	3.43719e-11	5	yes
	ENSG00000177697	CD151	11	836337	ENSG00000122786	CALD1	7	134542241	0.329906	0.0538244	8.82707e-10	6	yes
	ENSG00000177697	CD151	11	836337	ENSG00000120885	CLU	8	27463491	0.920521	0.0458387	1.06619e-89	8	yes
	ENSG00000177697	CD151	11	836337	ENSG00000205038	PKHD1L1	8	110458632	0.602096	0.0542941	1.41006e-28	7	yes
	ENSG00000177697	CD151	11	836337	ENSG00000137076	TLN1	9	35714668	0.478329	0.0509218	5.80882e-21	7	yes
	ENSG00000177697	CD151	11	836337	ENSG00000081377	CDC14B	9	99317317	0.51865	0.0477081	1.57906e-27	8	yes
	ENSG00000177697	CD151	11	836337	ENSG00000095303	PTGS1	9	125145403	1.19209	0.0885955	2.86038e-41	6	yes
	ENSG00000177697	CD151	11	836337	ENSG00000035403	VCL	10	75818895	0.743992	0.0663578	3.56773e-29	4	yes
	ENSG00000177697	CD151	11	836337	ENSG00000149218	ENDOD1	11	94844391	0.953495	0.0662073	5.05123e-47	6	yes
	ENSG00000177697	CD151	11	836337	ENSG00000154146	NRGN	11	124613849	1.18557	0.091772	3.53176e-38	6	yes
	ENSG00000177697	CD151	11	836337	ENSG00000149564	ESAM	11	124627106	0.28093	0.0435057	1.06569e-10	9	yes
	ENSG00000177697	CD151	11	836337	ENSG00000166086	JAM3	11	133980358	0.456119	0.0570747	1.33181e-15	5	yes
	ENSG00000177697	CD151	11	836337	ENSG00000011105	TSPAN9	12	3291125	1.59844	0.0868603	1.25496e-75	6	yes
	ENSG00000177697	CD151	11	836337	ENSG00000110799	VWF	12	6145988	1.29383	0.0795166	1.58209e-59	6	yes
	ENSG00000177697	CD151	11	836337	ENSG00000134548	C12orf39	12	21684776	0.485507	0.0808232	1.8895e-09	10	yes
	ENSG00000177697	CD151	11	836337	ENSG00000177119	ANO6	12	45721978	0.764129	0.063293	1.46893e-33	6	yes
	ENSG00000177697	CD151	11	836337	ENSG00000111328	CDK2AP1	12	123751204	0.290949	0.0529774	3.97523e-08	7	yes
	ENSG00000177697	CD151	11	836337	ENSG00000132970	WASF3	13	27197462	0.425748	0.0580253	2.17969e-13	5	yes
	ENSG00000177697	CD151	11	836337	ENSG00000166091	CMTM5	14	23847499	0.764108	0.0637499	4.20623e-33	6	yes
	ENSG00000177697	CD151	11	836337	ENSG00000156381	ANKRD9	14	102974657	0.798854	0.051228	7.98521e-55	7	yes
	ENSG00000177697	CD151	11	836337	ENSG00000069966	GNB5	15	52448341	0.304953	0.0433203	1.92933e-12	9	yes
	ENSG00000177697	CD151	11	836337	ENSG00000166831	RBPMS2	15	65049938	0.391389	0.0529205	1.40561e-13	6	yes
	ENSG00000177697	CD151	11	836337	ENSG00000156206	C15orf26	15	81370445	0.255134	0.046013	2.94249e-08	8	yes
	ENSG00000177697	CD151	11	836337	ENSG00000103942	HOMER2	15	83582249	0.348695	0.0499932	3.06178e-12	6	yes
	ENSG00000177697	CD151	11	836337	ENSG00000140479	PCSK6	15	101953111	0.715791	0.0566896	1.50823e-36	7	yes
	ENSG00000177697	CD151	11	836337	ENSG00000103184	SEC14L5	16	5038738	0.892671	0.0608864	1.14145e-48	7	yes
	ENSG00000177697	CD151	11	836337	ENSG00000140682	TGFB1I1	16	31486093	0.452202	0.0436888	4.16179e-25	10	yes
	ENSG00000177697	CD151	11	836337	ENSG00000205309	NT5M	17	17228813	0.891219	0.0570258	4.66709e-55	6	yes
	ENSG00000177697	CD151	11	836337	ENSG00000005961	ITGA2B	17	42458210	1.98392	0.105278	3.25653e-79	6	yes
	ENSG00000177697	CD151	11	836337	ENSG00000259207	ITGB3	17	45376435	2.04179	0.120339	1.44303e-64	6	yes
	ENSG00000177697	CD151	11	836337	ENSG00000167100	SAMD14	17	48197325	0.769148	0.0666334	8.00935e-31	5	yes
	ENSG00000177697	CD151	11	836337	ENSG00000108846	ABCC3	17	48740875	1.05082	0.0689184	1.71628e-52	6	yes
	ENSG00000177697	CD151	11	836337	ENSG00000099785	45353	19	8491027	0.701739	0.0488872	1.00179e-46	6	yes
	ENSG00000177697	CD151	11	836337	ENSG00000105507	CABP5	19	48540260	0.595838	0.0482475	4.89455e-35	9	yes
	ENSG00000177697	CD151	11	836337	ENSG00000185052	SLC24A3	20	19448435	0.656457	0.0614242	1.16754e-26	6	yes
	ENSG00000177697	CD151	11	836337	ENSG00000101335	MYL9	20	35174057	1.83724	0.0996144	5.87901e-76	6	yes
	ENSG00000177697	CD151	11	836337	ENSG00000064601	CTSA	20	44523525	0.338422	0.0445929	3.2206e-14	9	yes
	ENSG00000177697	CD151	11	836337	ENSG00000101162	TUBB1	20	57598009	0.482531	0.050976	2.91162e-21	7	yes
	ENSG00000177697	CD151	11	836337	ENSG00000184702	45540	22	19707141	1.32853	0.0815778	1.25291e-59	6	yes
	ENSG00000177697	CD151	11	836337	ENSG00000128266	GNAZ	22	23439882	0.553763	0.0488625	8.99787e-30	9	yes
	ENSG00000196565	HBG2	11	5470719	ENSG00000158941	CCAR2	8	22470586	-0.095197	0.0114696	1.04163e-16	5	no
	ENSG00000166452	AKIP1	11	8937158	ENSG00000182383	ENSG00000182383	5	74286238	0.422301	0.0421341	1.21038e-23	3	no
	ENSG00000166452	AKIP1	11	8937158	ENSG00000266891	RP11-692N5.2	18	9735239	-0.281583	0.0414678	1.11819e-11	3	no
	ENSG00000133789	SWAP70	11	9730081	ENSG00000240505	TNFRSF13B	17	16854140	-0.174879	0.0310708	1.81901e-08	3	yes
	ENSG00000066336	SPI1	11	47388269	ENSG00000164850	GPER1	7	1127647	-0.358077	0.062512	1.01543e-08	3	no
	ENSG00000172247	C1QTNF4	11	47613713	ENSG00000214548	MEG3	14	101286557	-0.131041	0.021082	5.10647e-10	3	no
	ENSG00000149485	FADS1	11	61581944	ENSG00000134765	DSC1	18	28726009	0.123573	0.0190076	7.96583e-11	6	yes
	ENSG00000149485	FADS1	11	61581944	ENSG00000130164	LDLR	19	11222265	0.133021	0.0193544	6.2902e-12	5	yes
	ENSG00000167996	FTH1	11	61731161	ENSG00000099194	SCD	10	102115736	0.546788	0.0807038	1.24201e-11	3	yes
	ENSG00000236935	AP003774.1	11	64094749	ENSG00000179967	PPP1R14BP3	4	140036306	-0.111434	0.0190649	5.06592e-09	3	no
	ENSG00000175334	BANF1	11	65770585	ENSG00000237758	ENSG00000237758	2	231589988	0.670994	0.0814747	1.78651e-16	3	no
	ENSG00000231793	DOC2GP	11	67381926	ENSG00000167992	VWCE	11	61044329	0.0921763	0.0143833	1.4688e-10	3	yes
	ENSG00000256269	HMBS	11	118959917	ENSG00000249992	TMEM158	3	45266864	0.275281	0.0462856	2.72359e-09	5	yes
	ENSG00000256269	HMBS	11	118959917	ENSG00000203813	HIST1H3H	6	27778078	0.341717	0.0480133	1.10197e-12	6	yes
	ENSG00000120647	CCDC77	12	525125	ENSG00000149573	MPZL2	11	118129684	-0.136887	0.0243111	1.79563e-08	3	yes
	ENSG00000067182	TNFRSF1A	12	6444601	ENSG00000157017	GHRL	3	10330995	0.385535	0.0535786	6.21451e-13	4	yes
	ENSG00000067182	TNFRSF1A	12	6444601	ENSG00000146232	NFKBIE	6	44229701	0.224694	0.0368224	1.04679e-09	5	yes
	ENSG00000067182	TNFRSF1A	12	6444601	ENSG00000118503	TNFAIP3	6	138196400	0.290732	0.0359445	6.0465e-16	5	yes
	ENSG00000067182	TNFRSF1A	12	6444601	ENSG00000104320	NBN	8	90980510	0.332241	0.0377105	1.24797e-18	4	yes
	ENSG00000067182	TNFRSF1A	12	6444601	ENSG00000100906	NFKBIA	14	35872336	0.566528	0.0547955	4.69641e-25	5	yes
	ENSG00000067182	TNFRSF1A	12	6444601	ENSG00000131323	TRAF3	14	103310825	0.217701	0.0354243	7.96991e-10	5	yes
	ENSG00000067182	TNFRSF1A	12	6444601	ENSG00000104856	RELB	19	45523070	0.305669	0.0379448	7.90679e-16	3	yes
	ENSG00000111321	LTBR	12	6492472	ENSG00000179921	GPBAR1	2	219126400	0.192668	0.0318913	1.52807e-09	4	yes
	ENSG00000111321	LTBR	12	6492472	ENSG00000157017	GHRL	3	10330995	0.399894	0.0566783	1.71972e-12	4	yes
	ENSG00000111321	LTBR	12	6492472	ENSG00000146232	NFKBIE	6	44229701	0.248347	0.0325311	2.27362e-14	6	yes
	ENSG00000111321	LTBR	12	6492472	ENSG00000118503	TNFAIP3	6	138196400	0.24112	0.0318798	3.92639e-14	6	yes
	ENSG00000150045	KLRF1	12	9988841	ENSG00000198574	SH2D1B	1	162373492	0.924926	0.0747805	3.86741e-35	5	yes
	ENSG00000150045	KLRF1	12	9988841	ENSG00000198821	CD247	1	167443862	0.464564	0.0630979	1.80368e-13	5	yes
	ENSG00000150045	KLRF1	12	9988841	ENSG00000163508	EOMES	3	27760823	0.959765	0.122756	5.34696e-15	3	yes
	ENSG00000150045	KLRF1	12	9988841	ENSG00000004468	CD38	4	15815483	0.500156	0.0724453	5.05872e-12	4	yes
	ENSG00000150045	KLRF1	12	9988841	ENSG00000135077	HAVCR2	5	156541361	0.379167	0.0651668	5.94104e-09	4	yes
	ENSG00000150045	KLRF1	12	9988841	ENSG00000167094	TTC16	9	130486112	-0.427178	0.0586632	3.29228e-13	6	yes
	ENSG00000150045	KLRF1	12	9988841	ENSG00000169583	CLIC3	9	139890171	0.796656	0.0810226	8.15582e-23	4	yes
	ENSG00000150045	KLRF1	12	9988841	ENSG00000196139	AKR1C3	10	5113713	0.373382	0.0648568	8.56133e-09	4	yes
	ENSG00000150045	KLRF1	12	9988841	ENSG00000167286	CD3D	11	118211564	-0.604102	0.07293	1.19788e-16	4	yes
	ENSG00000150045	KLRF1	12	9988841	ENSG00000136158	SPRY2	13	80912598	0.665516	0.0707865	5.3671e-21	5	yes
	ENSG00000150045	KLRF1	12	9988841	ENSG00000136158	SPRY2	13	80912598	0.665516	0.0707865	5.3671e-21	5	yes
	ENSG00000150045	KLRF1	12	9988841	ENSG00000141736	ERBB2	17	37865423	0.388111	0.0652591	2.72719e-09	4	yes
	ENSG00000150045	KLRF1	12	9988841	ENSG00000141622	RNF165	18	43974937	0.759605	0.0691228	4.30718e-28	5	yes
	ENSG00000248265	ENSG00000248265	12	54484028	ENSG00000103342	GSPT1	16	11985962	-0.185746	0.0336701	3.45542e-08	3	yes
	ENSG00000123405	NFE2	12	54690400	ENSG00000162444	RBP7	1	10066671	0.130549	0.0178457	2.56517e-13	4	yes
	ENSG00000123405	NFE2	12	54690400	ENSG00000162551	ALPL	1	21870381	-0.127508	0.0181161	1.94439e-12	4	yes
	ENSG00000123405	NFE2	12	54690400	ENSG00000142733	MAP3K6	1	27687529	-0.107337	0.0178867	1.96175e-09	5	yes
	ENSG00000123405	NFE2	12	54690400	ENSG00000134668	SPOCD1	1	32268837	0.286879	0.0183433	3.92042e-55	3	yes
	ENSG00000123405	NFE2	12	54690400	ENSG00000116729	WLS	1	68631472	0.272894	0.0183732	6.66754e-50	4	yes
	ENSG00000123405	NFE2	12	54690400	ENSG00000162614	NEXN	1	78381889	-0.100979	0.0176258	1.00979e-08	4	yes
	ENSG00000123405	NFE2	12	54690400	ENSG00000116299	KIAA1324	1	109702851	0.106953	0.0179272	2.43179e-09	4	yes
	ENSG00000123405	NFE2	12	54690400	ENSG00000014914	MTMR11	1	149904667	-0.123693	0.0178222	3.90965e-12	4	yes
	ENSG00000123405	NFE2	12	54690400	ENSG00000143367	TUFT1	1	151534420	-0.101453	0.0178051	1.21236e-08	4	yes
	ENSG00000123405	NFE2	12	54690400	ENSG00000143595	AQP10	1	154295683	-0.183306	0.0177089	4.13981e-25	4	yes
	ENSG00000123405	NFE2	12	54690400	ENSG00000143622	RIT1	1	155874397	0.223703	0.0261031	1.03509e-17	5	yes
	ENSG00000123405	NFE2	12	54690400	ENSG00000196189	SEMA4A	1	156132350	0.128835	0.0177882	4.39813e-13	4	yes
	ENSG00000123405	NFE2	12	54690400	ENSG00000163568	AIM2	1	159074580	0.11811	0.0176976	2.49255e-11	5	yes
	ENSG00000123405	NFE2	12	54690400	ENSG00000230124	RP5-1180C10.2	1	180242073	0.172781	0.0295993	5.30442e-09	5	yes
	ENSG00000123405	NFE2	12	54690400	ENSG00000135838	NPL	1	182778973	0.136566	0.0181444	5.20726e-14	4	yes
	ENSG00000123405	NFE2	12	54690400	ENSG00000077157	PPP1R12B	1	202437762	0.114523	0.017852	1.407e-10	4	yes
	ENSG00000123405	NFE2	12	54690400	ENSG00000133048	CHI3L1	1	203151968	-0.145364	0.0199914	3.55942e-13	4	yes
	ENSG00000123405	NFE2	12	54690400	ENSG00000143753	DEGS1	1	224372300	-0.119421	0.0176821	1.44019e-11	5	yes
	ENSG00000123405	NFE2	12	54690400	ENSG00000119280	C1orf198	1	230989100	0.146417	0.01775	1.59932e-16	4	yes
	ENSG00000123405	NFE2	12	54690400	ENSG00000162711	NLRP3	1	247595934	0.162082	0.017815	9.19382e-20	4	yes
	ENSG00000123405	NFE2	12	54690400	ENSG00000049323	LTBP1	2	33398307	0.101835	0.0175716	6.81559e-09	4	yes
	ENSG00000123405	NFE2	12	54690400	ENSG00000115590	IL1R2	2	102626656	0.134745	0.0177046	2.7251e-14	5	yes
	ENSG00000123405	NFE2	12	54690400	ENSG00000075884	ARHGAP15	2	144187426	-0.104626	0.0176986	3.38915e-09	5	yes
	ENSG00000123405	NFE2	12	54690400	ENSG00000187699	C2orf88	2	190906272	-0.133445	0.01792	9.57215e-14	4	yes
	ENSG00000123405	NFE2	12	54690400	ENSG00000229754	CXCR2P1	2	218927165	0.117571	0.0208469	1.70324e-08	3	yes
	ENSG00000123405	NFE2	12	54690400	ENSG00000127838	PNKD	2	219173315	0.124436	0.0178491	3.13487e-12	4	yes
	ENSG00000123405	NFE2	12	54690400	ENSG00000127831	VIL1	2	219300916	0.192022	0.025562	5.82328e-14	4	yes
	ENSG00000123405	NFE2	12	54690400	ENSG00000135929	CYP27A1	2	219663244	0.15249	0.0177875	1.00906e-17	4	yes
	ENSG00000123405	NFE2	12	54690400	ENSG00000180914	OXTR	3	8801704	0.112358	0.0175985	1.71891e-10	4	yes
	ENSG00000123405	NFE2	12	54690400	ENSG00000157017	GHRL	3	10330995	-0.177597	0.0259147	7.22349e-12	4	yes
	ENSG00000123405	NFE2	12	54690400	ENSG00000144677	CTDSPL	3	37964705	0.12896	0.0177656	3.89954e-13	4	yes
	ENSG00000123405	NFE2	12	54690400	ENSG00000249992	TMEM158	3	45266864	0.282977	0.017707	1.72961e-57	4	yes
	ENSG00000123405	NFE2	12	54690400	ENSG00000010327	STAB1	3	52543932	0.115335	0.0176779	6.83378e-11	5	yes
	ENSG00000123405	NFE2	12	54690400	ENSG00000157445	CACNA2D3	3	54632579	-0.140058	0.0178254	3.92821e-15	5	yes
	ENSG00000123405	NFE2	12	54690400	ENSG00000113924	HGD	3	120374219	-0.180876	0.019356	9.21219e-21	4	yes
	ENSG00000123405	NFE2	12	54690400	ENSG00000082781	ITGB5	3	124543734	0.10442	0.017682	3.51665e-09	4	yes
	ENSG00000123405	NFE2	12	54690400	ENSG00000243273	RP11-166N6.2	3	150682514	0.24179	0.0410174	3.75088e-09	5	yes
	ENSG00000123405	NFE2	12	54690400	ENSG00000196549	MME	3	154821705	0.109309	0.0177683	7.65592e-10	4	yes
	ENSG00000123405	NFE2	12	54690400	ENSG00000114805	PLCH1	3	155278112	-0.108819	0.0193664	1.92112e-08	5	yes
	ENSG00000123405	NFE2	12	54690400	ENSG00000118855	MFSD1	3	158498747	0.0993627	0.0176576	1.83156e-08	5	yes
	ENSG00000123405	NFE2	12	54690400	ENSG00000163958	ZDHHC19	3	195931314	-0.122219	0.0194408	3.24193e-10	4	yes
	ENSG00000123405	NFE2	12	54690400	ENSG00000109220	CHIC2	4	54903406	0.103487	0.0176464	4.50481e-09	5	yes
	ENSG00000123405	NFE2	12	54690400	ENSG00000169429	IL8	4	74607828	0.161589	0.0202731	1.57913e-15	4	yes
	ENSG00000123405	NFE2	12	54690400	ENSG00000163297	ANTXR2	4	80934455	-0.111074	0.0176625	3.20191e-10	5	yes
	ENSG00000123405	NFE2	12	54690400	ENSG00000151012	SLC7A11	4	139124377	0.111442	0.0178378	4.16956e-10	5	yes
	ENSG00000123405	NFE2	12	54690400	ENSG00000164237	CMBL	5	10292062	0.110148	0.017881	7.27229e-10	4	yes
	ENSG00000123405	NFE2	12	54690400	ENSG00000152684	PELO	5	52091827	0.203973	0.0206804	6.01698e-23	5	yes
	ENSG00000123405	NFE2	12	54690400	ENSG00000130449	ZSWIM6	5	60735048	0.15686	0.0199586	3.86309e-15	4	yes
	ENSG00000123405	NFE2	12	54690400	ENSG00000038427	VCAN	5	82822703	0.107791	0.0175655	8.43628e-10	5	yes
	ENSG00000123405	NFE2	12	54690400	ENSG00000120708	TGFBI	5	135382045	0.198049	0.0175901	2.08775e-29	5	yes
	ENSG00000123405	NFE2	12	54690400	ENSG00000173210	ABLIM3	5	148580575	0.168109	0.0175549	1.00704e-21	4	yes
	ENSG00000123405	NFE2	12	54690400	ENSG00000123643	SLC36A1	5	150844274	0.152404	0.0176957	7.14981e-18	5	yes
	ENSG00000123405	NFE2	12	54690400	ENSG00000113140	SPARC	5	151053691	0.116306	0.0176309	4.20284e-11	4	yes
	ENSG00000123405	NFE2	12	54690400	ENSG00000055163	CYFIP2	5	156757847	-0.103579	0.0177649	5.5234e-09	4	yes
	ENSG00000123405	NFE2	12	54690400	ENSG00000135083	CCNJL	5	159725531	-0.150221	0.0179322	5.42191e-17	5	yes
	ENSG00000123405	NFE2	12	54690400	ENSG00000113303	BTNL8	5	180351991	-0.110662	0.0177574	4.60881e-10	5	yes
	ENSG00000123405	NFE2	12	54690400	ENSG00000124491	F13A1	6	6232782	0.121968	0.0175915	4.11089e-12	4	yes
	ENSG00000123405	NFE2	12	54690400	ENSG00000153162	BMP6	6	7804342	0.117562	0.0178979	5.08307e-11	5	yes
	ENSG00000123405	NFE2	12	54690400	ENSG00000111837	MAK	6	10800860	-0.119841	0.0176982	1.27573e-11	5	yes
	ENSG00000123405	NFE2	12	54690400	ENSG00000112242	E2F3	6	20448169	0.146716	0.0255434	9.25768e-09	5	yes
	ENSG00000123405	NFE2	12	54690400	ENSG00000137261	KIAA0319	6	24595357	0.267623	0.0183801	5.0108e-48	4	yes
	ENSG00000123405	NFE2	12	54690400	ENSG00000111802	TDP2	6	24658733	0.25844	0.0180665	2.03894e-46	5	yes
	ENSG00000123405	NFE2	12	54690400	ENSG00000112304	ACOT13	6	24686278	0.135252	0.0182467	1.23989e-13	5	yes
	ENSG00000123405	NFE2	12	54690400	ENSG00000158406	HIST1H4H	6	26283522	-0.129741	0.0179301	4.62431e-13	5	yes
	ENSG00000123405	NFE2	12	54690400	ENSG00000146122	DAAM2	6	39816395	0.101386	0.0178704	1.40012e-08	4	yes
	ENSG00000123405	NFE2	12	54690400	ENSG00000184106	TREML3P	6	41183337	0.192182	0.0194472	4.97035e-23	5	yes
	ENSG00000123405	NFE2	12	54690400	ENSG00000111817	DSE	6	116667389	0.107573	0.017843	1.65111e-09	4	yes
	ENSG00000123405	NFE2	12	54690400	ENSG00000180354	C7orf41	7	30188402	0.116519	0.0193966	1.88781e-09	4	yes
	ENSG00000123405	NFE2	12	54690400	ENSG00000169902	TPST1	7	65777858	0.191815	0.0187199	1.22563e-24	3	yes
	ENSG00000123405	NFE2	12	54690400	ENSG00000127920	GNG11	7	93553421	0.13595	0.0177902	2.14156e-14	4	yes
	ENSG00000123405	NFE2	12	54690400	ENSG00000128512	DOCK4	7	111606316	0.138962	0.0179592	1.01277e-14	4	yes
	ENSG00000123405	NFE2	12	54690400	ENSG00000181220	ZNF746	7	149182396	0.110052	0.0177445	5.5733e-10	4	yes
	ENSG00000123405	NFE2	12	54690400	ENSG00000106617	PRKAG2	7	151413703	0.101706	0.0177115	9.33541e-09	5	yes
	ENSG00000123405	NFE2	12	54690400	ENSG00000105993	DNAJB6	7	157169104	0.101631	0.0177316	9.94603e-09	3	yes
	ENSG00000123405	NFE2	12	54690400	ENSG00000104714	ERICH1	8	626426	0.127343	0.0177643	7.58458e-13	5	yes
	ENSG00000123405	NFE2	12	54690400	ENSG00000104687	GSR	8	30560513	0.13967	0.0177847	4.04855e-15	5	yes
	ENSG00000123405	NFE2	12	54690400	ENSG00000165046	LETM2	8	38255385	0.173199	0.0259341	2.41518e-11	4	yes
	ENSG00000123405	NFE2	12	54690400	ENSG00000168615	ADAM9	8	38908525	0.098919	0.0176838	2.22201e-08	5	yes
	ENSG00000123405	NFE2	12	54690400	ENSG00000198363	ASPH	8	62520135	0.236575	0.0179685	1.37477e-39	4	yes
	ENSG00000123405	NFE2	12	54690400	ENSG00000164683	HEY1	8	80678171	0.347874	0.0188518	4.92538e-76	4	yes
	ENSG00000123405	NFE2	12	54690400	ENSG00000104267	CA2	8	86384901	-0.130177	0.0176122	1.45414e-13	4	yes
	ENSG00000123405	NFE2	12	54690400	ENSG00000184489	PTP4A3	8	142421856	0.129713	0.0180362	6.39402e-13	4	yes
	ENSG00000123405	NFE2	12	54690400	ENSG00000147894	C9orf72	9	27560204	0.14115	0.0177262	1.68231e-15	4	yes
	ENSG00000123405	NFE2	12	54690400	ENSG00000135048	TMEM2	9	74364944	0.0967788	0.0175819	3.70319e-08	5	yes
	ENSG00000123405	NFE2	12	54690400	ENSG00000165092	ALDH1A1	9	75605468	0.13493	0.0177182	2.63006e-14	5	yes
	ENSG00000123405	NFE2	12	54690400	ENSG00000172159	FRMD3	9	86005683	0.260964	0.0182511	2.23312e-46	3	yes
	ENSG00000123405	NFE2	12	54690400	ENSG00000213694	S1PR3	9	91613143	0.11824	0.0193465	9.85674e-10	5	yes
	ENSG00000123405	NFE2	12	54690400	ENSG00000095370	SH2D3C	9	130520808	-0.103351	0.0178129	6.55019e-09	4	yes
	ENSG00000123405	NFE2	12	54690400	ENSG00000183049	CAMK1D	10	12634513	-0.109859	0.0176555	4.89652e-10	5	yes
	ENSG00000123405	NFE2	12	54690400	ENSG00000065809	FAM107B	10	14688726	-0.111031	0.0178866	5.38435e-10	5	yes
	ENSG00000123405	NFE2	12	54690400	ENSG00000233968	RP11-354E11.2	10	20008368	0.46573	0.0408231	3.79184e-30	4	yes
	ENSG00000123405	NFE2	12	54690400	ENSG00000108100	CCNY	10	35698402	0.196005	0.0181521	3.52109e-27	4	yes
	ENSG00000123405	NFE2	12	54690400	ENSG00000072422	RHOBTB1	10	62695197	0.145781	0.0180755	7.31618e-16	4	yes
	ENSG00000123405	NFE2	12	54690400	ENSG00000122862	SRGN	10	70856214	0.146996	0.0177342	1.14369e-16	5	yes
	ENSG00000123405	NFE2	12	54690400	ENSG00000171206	TRIM8	10	104411164	0.108152	0.0181931	2.76951e-09	4	yes
	ENSG00000123405	NFE2	12	54690400	ENSG00000203497	PDCD4-AS1	10	112630808	-0.269753	0.0415001	8.02934e-11	4	yes
	ENSG00000123405	NFE2	12	54690400	ENSG00000198924	DCLRE1A	10	115604315	-0.133475	0.0175728	3.0646e-14	4	yes
	ENSG00000123405	NFE2	12	54690400	ENSG00000165650	PDZD8	10	119087489	-0.117508	0.0178264	4.3456e-11	4	yes
	ENSG00000123405	NFE2	12	54690400	ENSG00000151650	VENTX	10	135053304	-0.123235	0.0177036	3.37905e-12	5	yes
	ENSG00000123405	NFE2	12	54690400	ENSG00000174885	NLRP6	11	281862	-0.0995666	0.0177267	1.9457e-08	5	yes
	ENSG00000123405	NFE2	12	54690400	ENSG00000177156	TALDO1	11	756176	0.123214	0.0177375	3.74462e-12	4	yes
	ENSG00000123405	NFE2	12	54690400	ENSG00000225101	OR52K3P	11	4496583	0.257195	0.0410193	3.60856e-10	5	yes
	ENSG00000123405	NFE2	12	54690400	ENSG00000085063	CD59	11	33738899	-0.156965	0.0256324	9.14413e-10	4	yes
	ENSG00000123405	NFE2	12	54690400	ENSG00000135365	PHF21A	11	46046928	-0.100527	0.0179039	1.96766e-08	4	yes
	ENSG00000123405	NFE2	12	54690400	ENSG00000167992	VWCE	11	61044329	-0.133554	0.0177755	5.76208e-14	4	yes
	ENSG00000123405	NFE2	12	54690400	ENSG00000149781	FERMT3	11	63982752	0.182229	0.0178598	1.91658e-24	5	yes
	ENSG00000123405	NFE2	12	54690400	ENSG00000165457	FOLR2	11	71930319	-0.107601	0.0176567	1.10079e-09	5	yes
	ENSG00000123405	NFE2	12	54690400	ENSG00000149243	KLHL35	11	75137556	0.113469	0.017594	1.12373e-10	4	yes
	ENSG00000123405	NFE2	12	54690400	ENSG00000149269	PAK1	11	77109216	-0.111962	0.0175951	1.97563e-10	5	yes
	ENSG00000123405	NFE2	12	54690400	ENSG00000171840	NINJ2	12	723203	0.1127	0.0177909	2.37819e-10	4	yes
	ENSG00000123405	NFE2	12	54690400	ENSG00000011105	TSPAN9	12	3291125	0.102062	0.0176344	7.1362e-09	4	yes
	ENSG00000123405	NFE2	12	54690400	ENSG00000139178	C1RL	12	7252026	-0.135049	0.0179125	4.72278e-14	4	yes
	ENSG00000123405	NFE2	12	54690400	ENSG00000165682	CLEC1B	12	10152132	-0.248102	0.0179122	1.25379e-43	4	yes
	ENSG00000123405	NFE2	12	54690400	ENSG00000121316	PLBD1	12	14688939	0.139158	0.0193535	6.46317e-13	5	yes
	ENSG00000123405	NFE2	12	54690400	ENSG00000008394	MGST1	12	16631134	0.155299	0.0176834	1.60322e-18	5	yes
	ENSG00000123405	NFE2	12	54690400	ENSG00000177119	ANO6	12	45721978	0.115245	0.0193284	2.48456e-09	4	yes
	ENSG00000123405	NFE2	12	54690400	ENSG00000111110	PPM1H	12	63183289	0.104788	0.0177537	3.58431e-09	5	yes
	ENSG00000123405	NFE2	12	54690400	ENSG00000198431	TXNRD1	12	104676809	0.124275	0.0178702	3.54245e-12	5	yes
	ENSG00000123405	NFE2	12	54690400	ENSG00000136026	CKAP4	12	106664856	0.146526	0.0177305	1.40772e-16	4	yes
	ENSG00000123405	NFE2	12	54690400	ENSG00000176834	VSIG10	12	118537614	0.105678	0.0177116	2.42252e-09	5	yes
	ENSG00000123405	NFE2	12	54690400	ENSG00000130779	CLIP1	12	122831579	0.130698	0.0175832	1.06058e-13	5	yes
	ENSG00000123405	NFE2	12	54690400	ENSG00000132965	ALOX5AP	13	31324100	0.106921	0.0178118	1.93911e-09	4	yes
	ENSG00000123405	NFE2	12	54690400	ENSG00000136161	RCBTB2	13	49085232	0.134038	0.017673	3.3413e-14	5	yes
	ENSG00000123405	NFE2	12	54690400	ENSG00000150403	TMCO3	13	114174926	0.16778	0.0181048	1.91201e-20	4	yes
	ENSG00000123405	NFE2	12	54690400	ENSG00000165801	ARHGEF40	14	21548414	-0.111993	0.0193496	7.12909e-09	5	yes
	ENSG00000123405	NFE2	12	54690400	ENSG00000100612	DHRS7	14	60623706	0.10152	0.0177682	1.10631e-08	4	yes
	ENSG00000123405	NFE2	12	54690400	ENSG00000176903	PNMA1	14	74179811	0.105217	0.0176384	2.44297e-09	4	yes
	ENSG00000123405	NFE2	12	54690400	ENSG00000197249	SERPINA1	14	94850057	-0.113973	0.017908	1.96127e-10	5	yes
	ENSG00000123405	NFE2	12	54690400	ENSG00000175746	ENSG00000175746	15	39544965	-0.1563	0.0179841	3.59211e-18	4	yes
	ENSG00000123405	NFE2	12	54690400	ENSG00000069943	PIGB	15	55629502	0.173255	0.0178141	2.34249e-22	5	yes
	ENSG00000123405	NFE2	12	54690400	ENSG00000103942	HOMER2	15	83582249	0.12679	0.0176979	7.82734e-13	4	yes
	ENSG00000123405	NFE2	12	54690400	ENSG00000166825	ANPEP	15	90343376	0.227833	0.018264	1.02883e-35	3	yes
	ENSG00000123405	NFE2	12	54690400	ENSG00000149925	ALDOA	16	30073094	0.102926	0.0178672	8.38068e-09	5	yes
	ENSG00000123405	NFE2	12	54690400	ENSG00000140678	ITGAX	16	31380386	0.137235	0.0194652	1.78579e-12	5	yes
	ENSG00000123405	NFE2	12	54690400	ENSG00000140932	CMTM2	16	66617764	0.259234	0.0187482	1.74745e-43	4	yes
	ENSG00000123405	NFE2	12	54690400	ENSG00000176749	CDK5R1	17	30815955	-0.114907	0.0177768	1.02069e-10	4	yes
	ENSG00000123405	NFE2	12	54690400	ENSG00000005961	ITGA2B	17	42458210	0.154987	0.0179093	4.9717e-18	4	yes
	ENSG00000123405	NFE2	12	54690400	ENSG00000259207	ITGB3	17	45376435	0.207803	0.0257584	7.1812e-16	4	yes
	ENSG00000123405	NFE2	12	54690400	ENSG00000108846	ABCC3	17	48740875	0.149562	0.0178804	6.03175e-17	3	yes
	ENSG00000123405	NFE2	12	54690400	ENSG00000041353	RAB27B	18	52473919	-0.115571	0.017694	6.50366e-11	5	yes
	ENSG00000123405	NFE2	12	54690400	ENSG00000064666	CNN2	19	1032640	-0.108323	0.017876	1.36403e-09	4	yes
	ENSG00000123405	NFE2	12	54690400	ENSG00000167468	GPX4	19	1105361	0.11759	0.0181284	8.7855e-11	4	yes
	ENSG00000123405	NFE2	12	54690400	ENSG00000099875	MKNK2	19	2044356	-0.108076	0.0176622	9.412e-10	5	yes
	ENSG00000123405	NFE2	12	54690400	ENSG00000105518	TMEM205	19	11455323	0.118826	0.0179247	3.37529e-11	4	yes
	ENSG00000123405	NFE2	12	54690400	ENSG00000105011	ASF1B	19	14239044	-0.137055	0.0177133	1.01486e-14	5	yes
	ENSG00000123405	NFE2	12	54690400	ENSG00000186529	CYP4F3	19	15762670	0.135266	0.0178268	3.25316e-14	4	yes
	ENSG00000123405	NFE2	12	54690400	ENSG00000167460	TPM4	19	16195822	0.120292	0.0207648	6.91158e-09	5	yes
	ENSG00000123405	NFE2	12	54690400	ENSG00000127527	EPS15L1	19	16524473	0.135948	0.0177701	2.00377e-14	4	yes
	ENSG00000123405	NFE2	12	54690400	ENSG00000130300	PLVAP	19	17475208	-0.119144	0.0179181	2.94415e-11	3	yes
	ENSG00000123405	NFE2	12	54690400	ENSG00000121297	TSHZ3	19	31803152	0.126508	0.01967	1.26332e-10	3	yes
	ENSG00000123405	NFE2	12	54690400	ENSG00000105223	PLD3	19	40870354	0.102394	0.0176866	7.06605e-09	5	yes
	ENSG00000123405	NFE2	12	54690400	ENSG00000160410	SHKBP1	19	41090031	0.216761	0.0178225	4.9412e-34	4	yes
	ENSG00000123405	NFE2	12	54690400	ENSG00000170956	CEACAM3	19	42307980	-0.130081	0.0178961	3.6292e-13	5	yes
	ENSG00000123405	NFE2	12	54690400	ENSG00000079385	CEACAM1	19	43038421	-0.119766	0.0178118	1.76833e-11	5	yes
	ENSG00000123405	NFE2	12	54690400	ENSG00000101290	CDS2	20	5142982	0.1919	0.0186042	6.03669e-25	3	yes
	ENSG00000123405	NFE2	12	54690400	ENSG00000101335	MYL9	20	35174057	0.175352	0.0176899	3.67072e-23	4	yes
	ENSG00000123405	NFE2	12	54690400	ENSG00000124102	PI3	20	43804351	0.218256	0.0179697	6.0432e-34	4	yes
	ENSG00000123405	NFE2	12	54690400	ENSG00000064601	CTSA	20	44523525	0.213153	0.0177555	3.34962e-33	4	yes
	ENSG00000123405	NFE2	12	54690400	ENSG00000142192	APP	21	27398153	0.102373	0.0177397	7.88801e-09	4	yes
	ENSG00000123405	NFE2	12	54690400	ENSG00000156273	BACH1	21	30784731	0.108533	0.0178523	1.20576e-09	4	yes
	ENSG00000123405	NFE2	12	54690400	ENSG00000100365	NCF4	22	37265543	0.125888	0.0177393	1.27884e-12	4	yes
	ENSG00000123405	NFE2	12	54690400	ENSG00000188677	PARVB	22	44480098	-0.0970068	0.0176311	3.7542e-08	5	yes
	ENSG00000161642	ZNF385A	12	54773999	ENSG00000162444	RBP7	1	10066671	0.86966	0.0758448	1.94805e-30	6	yes
	ENSG00000161642	ZNF385A	12	54773999	ENSG00000014914	MTMR11	1	149904667	0.57836	0.0695867	9.4607e-17	6	yes
	ENSG00000161642	ZNF385A	12	54773999	ENSG00000162711	NLRP3	1	247595934	0.678497	0.0687282	5.49575e-23	7	yes
	ENSG00000161642	ZNF385A	12	54773999	ENSG00000010327	STAB1	3	52543932	0.751935	0.0826058	8.81226e-20	5	yes
	ENSG00000161642	ZNF385A	12	54773999	ENSG00000157445	CACNA2D3	3	54632579	0.692953	0.0995314	3.3512e-12	3	yes
	ENSG00000161642	ZNF385A	12	54773999	ENSG00000118855	MFSD1	3	158498747	0.584807	0.0642117	8.43215e-20	7	yes
	ENSG00000161642	ZNF385A	12	54773999	ENSG00000038427	VCAN	5	82822703	0.978705	0.0890631	4.32182e-28	6	yes
	ENSG00000161642	ZNF385A	12	54773999	ENSG00000120708	TGFBI	5	135382045	0.755446	0.0780647	3.7696e-22	5	yes
	ENSG00000161642	ZNF385A	12	54773999	ENSG00000055163	CYFIP2	5	156757847	-0.625633	0.0735238	1.75063e-17	6	yes
	ENSG00000161642	ZNF385A	12	54773999	ENSG00000146416	AIG1	6	143521537	-0.460088	0.0614259	6.8803e-14	7	yes
	ENSG00000161642	ZNF385A	12	54773999	ENSG00000106617	PRKAG2	7	151413703	0.377985	0.0592932	1.83149e-10	7	yes
	ENSG00000161642	ZNF385A	12	54773999	ENSG00000165092	ALDH1A1	9	75605468	1.22041	0.0980712	1.50557e-35	6	yes
	ENSG00000161642	ZNF385A	12	54773999	ENSG00000213694	S1PR3	9	91613143	0.72586	0.0803992	1.74522e-19	6	yes
	ENSG00000161642	ZNF385A	12	54773999	ENSG00000183049	CAMK1D	10	12634513	-0.334911	0.0605783	3.22851e-08	7	yes
	ENSG00000161642	ZNF385A	12	54773999	ENSG00000108100	CCNY	10	35698402	0.418771	0.0649978	1.17259e-10	6	yes
	ENSG00000161642	ZNF385A	12	54773999	ENSG00000121316	PLBD1	12	14688939	1.14357	0.0972977	6.78785e-32	6	yes
	ENSG00000161642	ZNF385A	12	54773999	ENSG00000008394	MGST1	12	16631134	0.989142	0.0959438	6.37653e-25	5	yes
	ENSG00000161642	ZNF385A	12	54773999	ENSG00000136026	CKAP4	12	106664856	0.33513	0.061348	4.68774e-08	6	yes
	ENSG00000161642	ZNF385A	12	54773999	ENSG00000132205	EMILIN2	18	2881509	0.750492	0.0850581	1.11152e-18	5	yes
	ENSG00000161642	ZNF385A	12	54773999	ENSG00000105518	TMEM205	19	11455323	0.766623	0.079085	3.20823e-22	6	yes
	ENSG00000161642	ZNF385A	12	54773999	ENSG00000105223	PLD3	19	40870354	0.731433	0.0782336	8.81945e-21	6	yes
	ENSG00000176422	SPRYD4	12	56863532	ENSG00000121089	NACA3P	4	165864765	-0.300711	0.0389204	1.10715e-14	4	yes
	ENSG00000076067	RBMS2	12	56950229	ENSG00000121089	NACA3P	4	165864765	-0.511654	0.0601561	1.80926e-17	5	yes
	ENSG00000076067	RBMS2	12	56950229	ENSG00000104267	CA2	8	86384901	-0.124506	0.0215801	7.95188e-09	7	yes
	ENSG00000198056	PRIM1	12	57135781	ENSG00000143595	AQP10	1	154295683	0.223603	0.037629	2.81044e-09	3	yes
	ENSG00000166888	STAT6	12	57507556	ENSG00000228224	NACAP1	8	102379478	0.124803	0.0220491	1.51168e-08	7	no
	ENSG00000090382	LYZ	12	69745067	ENSG00000143409	FAM63A	1	150974938	-0.0639897	0.00886643	5.31165e-13	7	yes
	ENSG00000090382	LYZ	12	69745067	ENSG00000263740	RN7SL4P	3	15780168	0.219994	0.0213344	6.23929e-25	8	yes
	ENSG00000090382	LYZ	12	69745067	ENSG00000172262	ZNF131	5	43128700	0.372775	0.00901213	0	7	yes
	ENSG00000090382	LYZ	12	69745067	ENSG00000120137	PANK3	5	167991052	0.0692086	0.00974666	1.24084e-12	8	yes
	ENSG00000090382	LYZ	12	69745067	ENSG00000075618	FSCN1	7	5639362	0.0636921	0.00894923	1.10261e-12	8	yes
	ENSG00000090382	LYZ	12	69745067	ENSG00000106261	ZKSCAN1	7	99626258	-0.0647497	0.00891865	3.86992e-13	8	yes
	ENSG00000090382	LYZ	12	69745067	ENSG00000196584	XRCC2	7	152357557	-0.0521988	0.00901211	6.95253e-09	8	yes
	ENSG00000090382	LYZ	12	69745067	ENSG00000227268	KLLN	10	89621056	0.0853971	0.0110776	1.26803e-14	8	yes
	ENSG00000090382	LYZ	12	69745067	ENSG00000243628	ENSG00000243628	10	104225999	0.410152	0.0231788	4.56779e-70	7	yes
	ENSG00000090382	LYZ	12	69745067	ENSG00000095627	ENSG00000095627	10	115965546	-0.0820625	0.00906358	1.3771e-19	8	yes
	ENSG00000090382	LYZ	12	69745067	ENSG00000170421	KRT8	12	53317357	-0.219677	0.0104643	7.62343e-98	8	yes
	ENSG00000090382	LYZ	12	69745067	ENSG00000266037	RN7SL3	14	50320484	0.185144	0.0251006	1.6299e-13	8	yes
	ENSG00000090382	LYZ	12	69745067	ENSG00000265150	RN7SL2	14	50329419	0.293119	0.020861	7.59232e-45	8	yes
	ENSG00000090382	LYZ	12	69745067	ENSG00000258730	ITPK1-AS1	14	93536147	-0.254021	0.0107973	2.1944e-122	7	yes
	ENSG00000090382	LYZ	12	69745067	ENSG00000247092	SNHG10	14	95999921	0.147735	0.0102223	2.42874e-47	8	yes
	ENSG00000090382	LYZ	12	69745067	ENSG00000198150	AC135178.1	17	8262634	-0.0773254	0.0104923	1.70986e-13	8	yes
	ENSG00000090382	LYZ	12	69745067	ENSG00000011258	MBTD1	17	49296155	-0.0655687	0.00890418	1.78731e-13	8	yes
	ENSG00000090382	LYZ	12	69745067	ENSG00000183077	AFMID	17	76193590	0.503291	0.00977093	0	8	yes
	ENSG00000090382	LYZ	12	69745067	ENSG00000161551	ZNF577	19	52376629	-0.0585319	0.00888417	4.44788e-11	8	yes
	ENSG00000090382	LYZ	12	69745067	ENSG00000101439	CST3	20	23613822	-0.0595169	0.00888956	2.1545e-11	5	yes
	ENSG00000090382	LYZ	12	69745067	ENSG00000093072	CECR1	22	17681536	-0.0534076	0.00895012	2.41283e-09	4	yes
	ENSG00000127337	YEATS4	12	69769029	ENSG00000143409	FAM63A	1	150974938	-0.0900352	0.0126622	1.15566e-12	3	yes
	ENSG00000127337	YEATS4	12	69769029	ENSG00000263740	RN7SL4P	3	15780168	0.306288	0.0305524	1.18344e-23	3	yes
	ENSG00000127337	YEATS4	12	69769029	ENSG00000172262	ZNF131	5	43128700	0.528361	0.0138565	0	3	yes
	ENSG00000127337	YEATS4	12	69769029	ENSG00000120137	PANK3	5	167991052	0.0966493	0.0139972	5.02312e-12	3	yes
	ENSG00000127337	YEATS4	12	69769029	ENSG00000075618	FSCN1	7	5639362	0.0930379	0.0127839	3.39472e-13	3	yes
	ENSG00000127337	YEATS4	12	69769029	ENSG00000106261	ZKSCAN1	7	99626258	-0.0881906	0.0127763	5.10347e-12	3	yes
	ENSG00000127337	YEATS4	12	69769029	ENSG00000196584	XRCC2	7	152357557	-0.0758706	0.0129241	4.34568e-09	3	yes
	ENSG00000127337	YEATS4	12	69769029	ENSG00000227268	KLLN	10	89621056	0.121689	0.0158171	1.43148e-14	3	yes
	ENSG00000127337	YEATS4	12	69769029	ENSG00000095627	ENSG00000095627	10	115965546	-0.114591	0.0129714	1.00931e-18	3	yes
	ENSG00000127337	YEATS4	12	69769029	ENSG00000266037	RN7SL3	14	50320484	0.262466	0.0361745	4.00085e-13	3	yes
	ENSG00000127337	YEATS4	12	69769029	ENSG00000258730	ITPK1-AS1	14	93536147	-0.357677	0.0165754	2.84387e-103	3	yes
	ENSG00000127337	YEATS4	12	69769029	ENSG00000247092	SNHG10	14	95999921	0.211106	0.0147202	1.20986e-46	3	yes
	ENSG00000127337	YEATS4	12	69769029	ENSG00000198150	AC135178.1	17	8262634	-0.111115	0.0150949	1.82448e-13	3	yes
	ENSG00000127337	YEATS4	12	69769029	ENSG00000011258	MBTD1	17	49296155	-0.0928476	0.0128609	5.22405e-13	3	yes
	ENSG00000127337	YEATS4	12	69769029	ENSG00000183077	AFMID	17	76193590	0.711266	0.0154813	0	3	yes
	ENSG00000127337	YEATS4	12	69769029	ENSG00000161551	ZNF577	19	52376629	-0.0824607	0.0127329	9.40605e-11	3	yes
	ENSG00000127337	YEATS4	12	69769029	ENSG00000101439	CST3	20	23613822	-0.0855711	0.0126295	1.23978e-11	3	yes
	ENSG00000127337	YEATS4	12	69769029	ENSG00000093072	CECR1	22	17681536	-0.0766385	0.0126897	1.54669e-09	3	yes
	ENSG00000111231	GPN3	12	110898654	ENSG00000256745	RP11-680H20.1	11	93921889	0.269949	0.0305598	1.01462e-18	3	no
	ENSG00000204852	TCTN1	12	111069533	ENSG00000197852	FAM212B	1	112260849	0.504755	0.0752082	1.92722e-11	4	yes
	ENSG00000204852	TCTN1	12	111069533	ENSG00000134198	TSPAN2	1	115611376	0.548683	0.0679977	7.07964e-16	5	yes
	ENSG00000204852	TCTN1	12	111069533	ENSG00000163568	AIM2	1	159074580	-0.614902	0.0859993	8.67249e-13	3	yes
	ENSG00000204852	TCTN1	12	111069533	ENSG00000213085	CCDC19	1	159856053	0.541738	0.0812346	2.57889e-11	4	yes
	ENSG00000204852	TCTN1	12	111069533	ENSG00000158710	TAGLN2	1	159891709	0.730742	0.0862273	2.35902e-17	4	yes
	ENSG00000204852	TCTN1	12	111069533	ENSG00000152061	RABGAP1L	1	174546496	0.609264	0.0942113	9.99689e-11	5	yes
	ENSG00000204852	TCTN1	12	111069533	ENSG00000143878	RHOB	2	20648017	0.350268	0.0596055	4.19195e-09	5	yes
	ENSG00000204852	TCTN1	12	111069533	ENSG00000084764	MAPRE3	2	27221772	0.405842	0.0660765	8.14899e-10	4	yes
	ENSG00000204852	TCTN1	12	111069533	ENSG00000162881	OXER1	2	42990521	-0.764822	0.0859505	5.6656e-19	4	yes
	ENSG00000204852	TCTN1	12	111069533	ENSG00000135636	DYSF	2	71797375	-0.453261	0.0753424	1.78774e-09	4	yes
	ENSG00000204852	TCTN1	12	111069533	ENSG00000196872	KIAA1211L	2	99481515	0.7523	0.0993457	3.65963e-14	3	yes
	ENSG00000204852	TCTN1	12	111069533	ENSG00000115604	IL18R1	2	102971603	-0.41724	0.058953	1.46774e-12	5	yes
	ENSG00000204852	TCTN1	12	111069533	ENSG00000144136	SLC20A1	2	113412419	0.715174	0.0979953	2.91993e-13	3	yes
	ENSG00000204852	TCTN1	12	111069533	ENSG00000073737	DHRS9	2	169936988	0.546648	0.0835565	6.05985e-11	3	yes
	ENSG00000204852	TCTN1	12	111069533	ENSG00000170876	TMEM43	3	14175809	0.961439	0.118763	5.70642e-16	3	yes
	ENSG00000204852	TCTN1	12	111069533	ENSG00000144635	DYNC1LI1	3	32589914	0.731898	0.0938862	6.41138e-15	5	yes
	ENSG00000204852	TCTN1	12	111069533	ENSG00000178075	GRAMD1C	3	113606525	0.348571	0.0618581	1.75048e-08	5	yes
	ENSG00000204852	TCTN1	12	111069533	ENSG00000079257	LXN	3	158377046	0.505461	0.072687	3.55229e-12	4	yes
	ENSG00000204852	TCTN1	12	111069533	ENSG00000196083	IL1RAP	3	190303841	0.906522	0.0950432	1.45617e-21	4	yes
	ENSG00000204852	TCTN1	12	111069533	ENSG00000181826	RELL1	4	37640210	0.417976	0.0738613	1.52313e-08	5	yes
	ENSG00000204852	TCTN1	12	111069533	ENSG00000174123	TLR10	4	38779235	0.427866	0.065186	5.24646e-11	5	yes
	ENSG00000204852	TCTN1	12	111069533	ENSG00000157796	WDR19	4	39235727	0.338437	0.0600014	1.69577e-08	5	yes
	ENSG00000204852	TCTN1	12	111069533	ENSG00000074966	TXK	4	48102341	-0.363882	0.0602367	1.53283e-09	5	yes
	ENSG00000204852	TCTN1	12	111069533	ENSG00000163297	ANTXR2	4	80934455	0.607727	0.070123	4.45237e-18	5	yes
	ENSG00000204852	TCTN1	12	111069533	ENSG00000145703	IQGAP2	5	75851515	0.414942	0.0610359	1.05846e-11	5	yes
	ENSG00000204852	TCTN1	12	111069533	ENSG00000081189	MEF2C	5	88106948	0.512511	0.0699024	2.27076e-13	4	yes
	ENSG00000204852	TCTN1	12	111069533	ENSG00000111837	MAK	6	10800860	0.816357	0.085743	1.7155e-21	4	yes
	ENSG00000204852	TCTN1	12	111069533	ENSG00000111913	FAM65B	6	24919919	0.476295	0.0679333	2.36245e-12	5	yes
	ENSG00000204852	TCTN1	12	111069533	ENSG00000112053	SLC26A8	6	35951968	-0.943177	0.104543	1.84795e-19	3	yes
	ENSG00000204852	TCTN1	12	111069533	ENSG00000164691	TAGAP	6	159460842	0.531403	0.0694058	1.91129e-14	5	yes
	ENSG00000204852	TCTN1	12	111069533	ENSG00000136867	SLC31A2	9	115919819	0.56073	0.0727502	1.28196e-14	4	yes
	ENSG00000204852	TCTN1	12	111069533	ENSG00000148450	MSRB2	10	23397688	-0.450318	0.0780268	7.86523e-09	4	yes
	ENSG00000204852	TCTN1	12	111069533	ENSG00000171988	JMJD1C	10	65076351	0.438864	0.0639331	6.67575e-12	5	yes
	ENSG00000204852	TCTN1	12	111069533	ENSG00000108175	ZMIZ1	10	80952534	0.794975	0.0985127	7.04269e-16	3	yes
	ENSG00000204852	TCTN1	12	111069533	ENSG00000189319	FAM53B	10	126370349	0.38031	0.0679133	2.14434e-08	4	yes
	ENSG00000204852	TCTN1	12	111069533	ENSG00000160593	AMICA1	11	118080132	-0.686324	0.0818749	5.17768e-17	4	yes
	ENSG00000204852	TCTN1	12	111069533	ENSG00000139112	GABARAPL1	12	10370392	0.539474	0.0815347	3.67813e-11	3	yes
	ENSG00000204852	TCTN1	12	111069533	ENSG00000064763	FAR2	12	29397974	0.623694	0.0798863	5.84387e-15	5	yes
	ENSG00000204852	TCTN1	12	111069533	ENSG00000161638	ITGA5	12	54801144	0.895914	0.0965353	1.68379e-20	3	yes
	ENSG00000204852	TCTN1	12	111069533	ENSG00000070961	ATP2B1	12	90042452	0.603596	0.0816683	1.45929e-13	4	yes
	ENSG00000204852	TCTN1	12	111069533	ENSG00000069943	PIGB	15	55629502	0.636267	0.0730479	3.03129e-18	4	yes
	ENSG00000204852	TCTN1	12	111069533	ENSG00000103381	CPPED1	16	12827396	0.585653	0.0742966	3.20548e-15	4	yes
	ENSG00000204852	TCTN1	12	111069533	ENSG00000075399	VPS9D1	16	89780468	-0.360454	0.0652583	3.32312e-08	5	yes
	ENSG00000204852	TCTN1	12	111069533	ENSG00000007237	GAS7	17	9957897	0.733227	0.103574	1.44932e-12	3	yes
	ENSG00000204852	TCTN1	12	111069533	ENSG00000154845	PPP4R1	18	9581013	0.393574	0.060505	7.77906e-11	5	yes
	ENSG00000204852	TCTN1	12	111069533	ENSG00000267519	MIR24-2	19	13946216	0.867166	0.141743	9.4821e-10	5	yes
	ENSG00000204852	TCTN1	12	111069533	ENSG00000123146	CD97	19	14505425	0.395012	0.0655863	1.71442e-09	5	yes
	ENSG00000204852	TCTN1	12	111069533	ENSG00000130518	KIAA1683	19	18376612	0.407632	0.0736601	3.13085e-08	4	yes
	ENSG00000204852	TCTN1	12	111069533	ENSG00000010361	FUZ	19	50315379	0.512876	0.0648498	2.60151e-15	5	yes
	ENSG00000204852	TCTN1	12	111069533	ENSG00000104973	MED25	19	50331806	0.495318	0.0882467	1.98993e-08	5	yes
	ENSG00000204852	TCTN1	12	111069533	ENSG00000161643	SIGLEC16	19	50475964	-0.325333	0.0585678	2.77922e-08	5	yes
	ENSG00000204852	TCTN1	12	111069533	ENSG00000142405	NLRP12	19	54312252	-0.414164	0.07186	8.23951e-09	4	yes
	ENSG00000204852	TCTN1	12	111069533	ENSG00000179820	MYADM	19	54374584	1.29907	0.145058	3.38133e-19	3	yes
	ENSG00000204852	TCTN1	12	111069533	ENSG00000157551	KCNJ15	21	39601438	-0.707656	0.0793873	4.92342e-19	4	yes
	ENSG00000204852	TCTN1	12	111069533	ENSG00000183762	KREMEN1	22	29516693	-0.576187	0.0981223	4.30223e-09	3	yes
	ENSG00000111275	ALDH2	12	112226236	ENSG00000162496	DHRS3	1	12652838	-0.118871	0.0210502	1.63246e-08	16	yes
	ENSG00000111275	ALDH2	12	112226236	ENSG00000117228	GBP1	1	89524522	-0.186667	0.0212778	1.74245e-18	15	yes
	ENSG00000111275	ALDH2	12	112226236	ENSG00000162645	GBP2	1	89593977	-0.218047	0.0210961	4.8499e-25	15	yes
	ENSG00000111275	ALDH2	12	112226236	ENSG00000162654	GBP4	1	89655723	-0.201414	0.0234074	7.65272e-18	14	yes
	ENSG00000111275	ALDH2	12	112226236	ENSG00000154451	GBP5	1	89731588	-0.284644	0.032425	1.65621e-18	15	yes
	ENSG00000111275	ALDH2	12	112226236	ENSG00000188641	DPYD	1	97964952	0.197262	0.0309475	1.84082e-10	15	yes
	ENSG00000111275	ALDH2	12	112226236	ENSG00000134243	SORT1	1	109896382	0.328925	0.035869	4.72218e-20	13	yes
	ENSG00000111275	ALDH2	12	112226236	ENSG00000197747	S100A10	1	151961128	0.183386	0.0236057	7.92943e-15	11	yes
	ENSG00000111275	ALDH2	12	112226236	ENSG00000136653	RASSF5	1	206721747	-0.116476	0.0212401	4.16311e-08	16	yes
	ENSG00000111275	ALDH2	12	112226236	ENSG00000162909	CAPN2	1	223926507	0.217322	0.0291432	8.84836e-14	14	yes
	ENSG00000111275	ALDH2	12	112226236	ENSG00000068784	SRBD1	2	45727561	-0.133103	0.0214693	5.65771e-10	15	yes
	ENSG00000111275	ALDH2	12	112226236	ENSG00000172005	MAL	2	95705579	-0.118587	0.0210304	1.71216e-08	16	yes
	ENSG00000111275	ALDH2	12	112226236	ENSG00000115607	IL18RAP	2	103052087	-0.133001	0.0210903	2.85854e-10	15	yes
	ENSG00000111275	ALDH2	12	112226236	ENSG00000169554	ZEB2	2	145213857	0.225341	0.0352771	1.68365e-10	13	yes
	ENSG00000111275	ALDH2	12	112226236	ENSG00000135905	DOCK10	2	225768484	-0.146354	0.0257511	1.32026e-08	14	yes
	ENSG00000111275	ALDH2	12	112226236	ENSG00000138496	PARP9	3	122265097	-0.161083	0.0212188	3.16177e-14	16	yes
	ENSG00000111275	ALDH2	12	112226236	ENSG00000173193	PARP14	3	122424576	-0.137	0.0232695	3.92001e-09	14	yes
	ENSG00000111275	ALDH2	12	112226236	ENSG00000174944	P2RY14	3	150963080	-0.152074	0.0211052	5.782e-13	16	yes
	ENSG00000111275	ALDH2	12	112226236	ENSG00000114346	ECT2	3	172503868	0.138823	0.0232015	2.18556e-09	15	yes
	ENSG00000111275	ALDH2	12	112226236	ENSG00000091490	SEL1L3	4	25807218	-0.202818	0.028453	1.01718e-12	15	yes
	ENSG00000111275	ALDH2	12	112226236	ENSG00000174123	TLR10	4	38779235	-0.156002	0.0280548	2.68862e-08	15	yes
	ENSG00000111275	ALDH2	12	112226236	ENSG00000082074	FYB	5	39189984	-0.135778	0.0209033	8.27468e-11	16	yes
	ENSG00000111275	ALDH2	12	112226236	ENSG00000125347	IRF1	5	131821895	-0.128583	0.0208932	7.54171e-10	16	yes
	ENSG00000111275	ALDH2	12	112226236	ENSG00000026950	BTN3A1	6	26408954	-0.114628	0.0209571	4.50876e-08	16	yes
	ENSG00000111275	ALDH2	12	112226236	ENSG00000111961	SASH1	6	148733313	0.190517	0.0319995	2.62093e-09	12	yes
	ENSG00000111275	ALDH2	12	112226236	ENSG00000106537	TSPAN13	7	16808660	-0.175257	0.0300105	5.22492e-09	11	yes
	ENSG00000111275	ALDH2	12	112226236	ENSG00000092964	DPYSL2	8	26443742	0.368875	0.0346621	1.8999e-26	12	yes
	ENSG00000111275	ALDH2	12	112226236	ENSG00000135046	ANXA1	9	75775991	0.14227	0.0224632	2.39699e-10	15	yes
	ENSG00000111275	ALDH2	12	112226236	ENSG00000136867	SLC31A2	9	115919819	0.182366	0.0239807	2.85553e-14	13	yes
	ENSG00000111275	ALDH2	12	112226236	ENSG00000132274	TRIM22	11	5734619	-0.160065	0.0210519	2.88547e-14	16	yes
	ENSG00000111275	ALDH2	12	112226236	ENSG00000156587	UBE2L6	11	57327443	-0.146583	0.0210281	3.15167e-12	16	yes
	ENSG00000111275	ALDH2	12	112226236	ENSG00000149131	SERPING1	11	57373593	-0.137186	0.0228384	1.89186e-09	15	yes
	ENSG00000111275	ALDH2	12	112226236	ENSG00000110077	MS4A6A	11	59945610	0.530934	0.0373581	7.71805e-46	12	yes
	ENSG00000111275	ALDH2	12	112226236	ENSG00000077514	POLD3	11	74292529	0.143525	0.0232136	6.29814e-10	15	yes
	ENSG00000111275	ALDH2	12	112226236	ENSG00000118971	CCND2	12	4398727	-0.135482	0.0235911	9.30582e-09	15	yes
	ENSG00000111275	ALDH2	12	112226236	ENSG00000250510	GPR162	12	6933648	0.156217	0.0237752	5.01232e-11	13	yes
	ENSG00000111275	ALDH2	12	112226236	ENSG00000102445	KIAA0226L	13	46964232	-0.216717	0.0327333	3.57518e-11	14	yes
	ENSG00000111275	ALDH2	12	112226236	ENSG00000102445	KIAA0226L	13	46964232	-0.216717	0.0327333	3.57518e-11	14	yes
	ENSG00000111275	ALDH2	12	112226236	ENSG00000214274	ANG	14	21159733	0.158611	0.0217122	2.76943e-13	13	yes
	ENSG00000111275	ALDH2	12	112226236	ENSG00000165801	ARHGEF40	14	21548414	0.191037	0.0263102	3.84348e-13	13	yes
	ENSG00000111275	ALDH2	12	112226236	ENSG00000054654	SYNE2	14	64506424	-0.171842	0.0237107	4.24638e-13	14	yes
	ENSG00000111275	ALDH2	12	112226236	ENSG00000167207	NOD2	16	50747251	0.21461	0.0338815	2.38647e-10	14	yes
	ENSG00000111275	ALDH2	12	112226236	ENSG00000108679	LGALS3BP	17	76971755	-0.171681	0.0233378	1.88976e-13	14	yes
	ENSG00000111275	ALDH2	12	112226236	ENSG00000171791	BCL2	18	60888970	-0.143175	0.0210738	1.09084e-11	16	yes
	ENSG00000111275	ALDH2	12	112226236	ENSG00000176533	GNG7	19	2606962	-0.179606	0.0294384	1.05361e-09	13	yes
	ENSG00000111275	ALDH2	12	112226236	ENSG00000167600	CYP2S1	19	41706199	0.177393	0.0225946	4.1237e-15	12	yes
	ENSG00000111275	ALDH2	12	112226236	ENSG00000142405	NLRP12	19	54312252	0.128699	0.0212962	1.51e-09	14	yes
	ENSG00000111275	ALDH2	12	112226236	ENSG00000101337	TM9SF4	20	30726185	0.124445	0.0211998	4.3555e-09	16	yes
	ENSG00000111275	ALDH2	12	112226236	ENSG00000124181	PLCG1	20	39795513	-0.125318	0.0216048	6.61273e-09	14	yes
	ENSG00000111275	ALDH2	12	112226236	ENSG00000100385	IL2RB	22	37546486	-0.146895	0.0211054	3.40056e-12	16	yes
	ENSG00000182500	ORAI1	12	122072519	ENSG00000175746	ENSG00000175746	15	39544965	-0.430843	0.0755112	1.15872e-08	3	yes
	ENSG00000182500	ORAI1	12	122072519	ENSG00000099785	45353	19	8491027	0.409595	0.0743873	3.66566e-08	3	yes
	ENSG00000155465	SLC7A7	14	23270730	ENSG00000162444	RBP7	1	10066671	0.430807	0.0600076	7.01211e-13	6	yes
	ENSG00000155465	SLC7A7	14	23270730	ENSG00000158473	CD1D	1	158152211	0.846764	0.0728858	3.35165e-31	6	yes
	ENSG00000155465	SLC7A7	14	23270730	ENSG00000071967	CYBRD1	2	172396700	0.351925	0.0583175	1.59326e-09	6	yes
	ENSG00000155465	SLC7A7	14	23270730	ENSG00000179921	GPBAR1	2	219126400	0.53351	0.0633766	3.82673e-17	6	yes
	ENSG00000155465	SLC7A7	14	23270730	ENSG00000170275	CRTAP	3	33170312	0.565199	0.0610126	1.97546e-20	7	yes
	ENSG00000155465	SLC7A7	14	23270730	ENSG00000010327	STAB1	3	52543932	0.585246	0.0757456	1.1057e-14	4	yes
	ENSG00000155465	SLC7A7	14	23270730	ENSG00000157445	CACNA2D3	3	54632579	0.563432	0.0813824	4.41363e-12	4	yes
	ENSG00000155465	SLC7A7	14	23270730	ENSG00000109667	SLC2A9	4	9914668	0.777099	0.0821042	2.94138e-21	5	yes
	ENSG00000155465	SLC7A7	14	23270730	ENSG00000138760	SCARB2	4	77107468	0.412125	0.0573197	6.48208e-13	7	yes
	ENSG00000155465	SLC7A7	14	23270730	ENSG00000164125	FAM198B	4	159070048	0.742756	0.0750426	4.25555e-23	5	yes
	ENSG00000155465	SLC7A7	14	23270730	ENSG00000120708	TGFBI	5	135382045	0.732413	0.0694815	5.58343e-26	6	yes
	ENSG00000155465	SLC7A7	14	23270730	ENSG00000182578	CSF1R	5	149462894	0.789248	0.106441	1.21725e-13	3	yes
	ENSG00000155465	SLC7A7	14	23270730	ENSG00000106066	CPVL	7	29134957	0.620248	0.0686411	1.62362e-19	5	yes
	ENSG00000155465	SLC7A7	14	23270730	ENSG00000164733	CTSB	8	11713495	0.413734	0.0556732	1.074e-13	7	yes
	ENSG00000155465	SLC7A7	14	23270730	ENSG00000092964	DPYSL2	8	26443742	0.893096	0.0751454	1.41807e-32	6	yes
	ENSG00000155465	SLC7A7	14	23270730	ENSG00000136830	FAM129B	9	130304443	0.443743	0.0574429	1.11904e-14	7	yes
	ENSG00000155465	SLC7A7	14	23270730	ENSG00000187796	CARD9	9	139262244	0.503245	0.0646217	6.83126e-15	7	yes
	ENSG00000155465	SLC7A7	14	23270730	ENSG00000214063	TSPAN4	11	854962	0.394679	0.0555145	1.16488e-12	7	yes
	ENSG00000155465	SLC7A7	14	23270730	ENSG00000084207	GSTP1	11	67352598	0.685224	0.064997	5.50768e-26	6	yes
	ENSG00000155465	SLC7A7	14	23270730	ENSG00000184232	OAF	11	120091258	0.820835	0.0736632	7.73865e-29	6	yes
	ENSG00000155465	SLC7A7	14	23270730	ENSG00000111321	LTBR	12	6492472	0.379841	0.0585829	8.94235e-11	6	yes
	ENSG00000155465	SLC7A7	14	23270730	ENSG00000008394	MGST1	12	16631134	0.684663	0.0620949	2.86106e-28	7	yes
	ENSG00000155465	SLC7A7	14	23270730	ENSG00000178695	KCTD12	13	77457426	0.531829	0.0646754	1.9841e-16	6	yes
	ENSG00000155465	SLC7A7	14	23270730	ENSG00000132205	EMILIN2	18	2881509	0.605606	0.0669746	1.53384e-19	6	yes
	ENSG00000155465	SLC7A7	14	23270730	ENSG00000104918	RETN	19	7734632	0.473024	0.0591638	1.29413e-15	6	yes
	ENSG00000155465	SLC7A7	14	23270730	ENSG00000130881	LRP3	19	33683601	0.601089	0.0679821	9.41265e-19	5	yes
	ENSG00000155465	SLC7A7	14	23270730	ENSG00000126458	RRAS	19	50141003	0.316527	0.0553102	1.0481e-08	7	yes
	ENSG00000155465	SLC7A7	14	23270730	ENSG00000105383	CD33	19	51737717	0.661151	0.0669091	5.01641e-23	6	yes
	ENSG00000155465	SLC7A7	14	23270730	ENSG00000132669	RIN2	20	19925133	0.597876	0.0679719	1.41878e-18	6	yes
	ENSG00000155465	SLC7A7	14	23270730	ENSG00000101439	CST3	20	23613822	0.443667	0.064309	5.23755e-12	5	yes
	ENSG00000155465	SLC7A7	14	23270730	ENSG00000093072	CECR1	22	17681536	0.682717	0.0657062	2.74039e-25	6	yes
	ENSG00000198604	BAZ1A	14	35283395	ENSG00000170956	CEACAM3	19	42307980	-0.604606	0.0919997	4.9703e-11	3	yes
	ENSG00000198604	BAZ1A	14	35283395	ENSG00000198355	PIM3	22	50355944	-0.652693	0.0965267	1.36292e-11	3	yes
	ENSG00000258289	CHURC1	14	65396194	ENSG00000206177	HBM	16	210329	0.105367	0.0179749	4.57636e-09	3	yes
	ENSG00000125952	MAX	14	65521152	ENSG00000153574	RPIA	2	89020807	-0.31888	0.0477859	2.50461e-11	3	no
	ENSG00000214548	MEG3	14	101286557	ENSG00000163703	CRELD1	3	9981301	-0.145132	0.0149654	3.08122e-22	8	no
	ENSG00000075413	MARK3	14	103910948	ENSG00000115919	KYNU	2	143717478	-0.174455	0.0228523	2.27507e-14	3	yes
	ENSG00000075413	MARK3	14	103910948	ENSG00000038427	VCAN	5	82822703	-0.139377	0.0226534	7.6232e-10	3	yes
	ENSG00000104093	DMXL2	15	51827469	ENSG00000138646	HERC5	4	89402791	-0.350536	0.0511351	7.1267e-12	5	yes
	ENSG00000104093	DMXL2	15	51827469	ENSG00000185745	IFIT1	10	91158024	-0.284094	0.0490056	6.74417e-09	5	yes
	ENSG00000104093	DMXL2	15	51827469	ENSG00000157601	MX1	21	42811686	-0.309568	0.0493855	3.64768e-10	5	yes
	ENSG00000128872	TMOD2	15	52076161	ENSG00000137959	IFI44L	1	79097045	0.19108	0.0315845	1.45013e-09	5	yes
	ENSG00000128872	TMOD2	15	52076161	ENSG00000137965	IFI44	1	79122622	0.179245	0.0318261	1.78122e-08	5	yes
	ENSG00000140391	TSPAN3	15	77356342	ENSG00000116586	LAMTOR2	1	156026422	0.215377	0.033874	2.04154e-10	3	yes
	ENSG00000140391	TSPAN3	15	77356342	ENSG00000093072	CECR1	22	17681536	0.151638	0.0270627	2.104e-08	3	yes
	ENSG00000103148	NPRL3	16	161566	ENSG00000108309	RUNDC3A	17	42390910	0.521472	0.0384652	7.20228e-42	7	yes
	ENSG00000130656	HBZ	16	203594	ENSG00000173876	ENSG00000173876	10	106465	-0.146896	0.0238432	7.23268e-10	8	yes
	ENSG00000130656	HBZ	16	203594	ENSG00000173876	ENSG00000173876	10	106465	-0.146896	0.0238432	7.23268e-10	8	yes
	ENSG00000130656	HBZ	16	203594	ENSG00000261812	TUBB8P7	16	90161162	-0.16366	0.0251792	8.04186e-11	8	yes
	ENSG00000130656	HBZ	16	203594	ENSG00000108309	RUNDC3A	17	42390910	-0.0891388	0.0121034	1.77471e-13	7	yes
	ENSG00000130656	HBZ	16	203594	ENSG00000173213	RP11-683L23.1	18	60385	-0.149118	0.0252582	3.55359e-09	8	yes
	ENSG00000167930	ITFG3	16	302243	ENSG00000159247	TUBBP5	9	141058193	-0.362856	0.0625898	6.73663e-09	4	yes
	ENSG00000167930	ITFG3	16	302243	ENSG00000233013	FAM157B	9	141125040	-0.454121	0.0830717	4.58717e-08	4	yes
	ENSG00000167930	ITFG3	16	302243	ENSG00000173876	ENSG00000173876	10	106465	-0.654499	0.0777605	3.86721e-17	4	yes
	ENSG00000167930	ITFG3	16	302243	ENSG00000261812	TUBB8P7	16	90161162	-0.71346	0.0842123	2.40885e-17	3	yes
	ENSG00000167930	ITFG3	16	302243	ENSG00000108309	RUNDC3A	17	42390910	0.456282	0.0771124	3.27647e-09	3	yes
	ENSG00000167930	ITFG3	16	302243	ENSG00000173213	RP11-683L23.1	18	60385	-0.650864	0.0827843	3.77544e-15	4	yes
	ENSG00000180185	FAHD1	16	1883588	ENSG00000189060	H1F0	22	38202278	-0.327214	0.0533001	8.29968e-10	3	yes
	ENSG00000169180	XPO6	16	28166270	ENSG00000125347	IRF1	5	131821895	0.52464	0.0654861	1.13351e-15	3	yes
	ENSG00000169180	XPO6	16	28166270	ENSG00000205220	PSMB10	16	67969697	0.396856	0.0608263	6.82703e-11	3	yes
	ENSG00000169180	XPO6	16	28166270	ENSG00000096996	IL12RB1	19	18189782	0.348083	0.0612639	1.33373e-08	3	yes
	ENSG00000188322	SBK1	16	28319505	ENSG00000125462	C1orf61	1	156387268	0.244618	0.0412679	3.07466e-09	3	no
	ENSG00000188322	SBK1	16	28319505	ENSG00000138119	MYOF	10	95154130	0.297429	0.0472825	3.16509e-10	3	no
	ENSG00000188322	SBK1	16	28319505	ENSG00000140511	HAPLN3	15	89429688	0.340551	0.0438327	7.89011e-15	3	no
	ENSG00000188322	SBK1	16	28319505	ENSG00000133313	CNDP2	18	72175708	0.260252	0.0417138	4.40359e-10	3	no
	ENSG00000197272	IL27	16	28517027	ENSG00000090104	RGS1	1	192547009	-0.371883	0.062925	3.4223e-09	3	no
	ENSG00000197272	IL27	16	28517027	ENSG00000131979	GCH1	14	55339148	-0.416679	0.0660865	2.88107e-10	3	no
	ENSG00000197272	IL27	16	28517027	ENSG00000133313	CNDP2	18	72175708	-0.368291	0.0629237	4.82818e-09	3	no
	ENSG00000196502	SULT1A1	16	28625924	ENSG00000205220	PSMB10	16	67969697	-0.344549	0.0596119	7.47556e-09	3	yes
	ENSG00000196502	SULT1A1	16	28625924	ENSG00000096996	IL12RB1	19	18189782	-0.331982	0.0559204	2.90834e-09	3	yes
	ENSG00000261067	ENSG00000261067	16	28994110	ENSG00000116663	FBXO6	1	11729296	-0.380077	0.0657251	7.34534e-09	3	yes
	ENSG00000261067	ENSG00000261067	16	28994110	ENSG00000162645	GBP2	1	89593977	-0.45147	0.0649829	3.71787e-12	3	yes
	ENSG00000261067	ENSG00000261067	16	28994110	ENSG00000125347	IRF1	5	131821895	-0.392882	0.0634704	6.01619e-10	3	yes
	ENSG00000261067	ENSG00000261067	16	28994110	ENSG00000134470	IL15RA	10	6005594	-0.35262	0.0644791	4.53206e-08	3	yes
	ENSG00000261067	ENSG00000261067	16	28994110	ENSG00000156587	UBE2L6	11	57327443	-0.379641	0.0636681	2.47924e-09	3	yes
	ENSG00000261067	ENSG00000261067	16	28994110	ENSG00000133321	RARRES3	11	63309107	-0.455283	0.0700831	8.23058e-11	3	yes
	ENSG00000261067	ENSG00000261067	16	28994110	ENSG00000166002	SMCO4	11	93244156	-0.384394	0.0691401	2.70324e-08	3	yes
	ENSG00000261067	ENSG00000261067	16	28994110	ENSG00000185880	TRIM69	15	45040606	-0.389745	0.0635321	8.53683e-10	3	yes
	ENSG00000261067	ENSG00000261067	16	28994110	ENSG00000205220	PSMB10	16	67969697	-0.401411	0.0655188	8.97415e-10	3	yes
	ENSG00000261067	ENSG00000261067	16	28994110	ENSG00000096996	IL12RB1	19	18189782	-0.360646	0.0641429	1.88171e-08	3	yes
	ENSG00000169592	INO80E	16	30011864	ENSG00000234719	RP11-166B2.1	16	12045865	-0.519041	0.0445082	2.00034e-31	3	yes
	ENSG00000169592	INO80E	16	30011864	ENSG00000243716	NPIPB5	16	22519142	-0.379579	0.0400779	2.771e-21	3	yes
	ENSG00000169592	INO80E	16	30011864	ENSG00000261556	RP11-296I10.6	16	70266498	-0.232245	0.0372072	4.32131e-10	3	yes
	ENSG00000090238	YPEL3	16	30105935	ENSG00000234719	RP11-166B2.1	16	12045865	0.701341	0.0523448	6.17031e-41	5	yes
	ENSG00000090238	YPEL3	16	30105935	ENSG00000243716	NPIPB5	16	22519142	0.532377	0.0547884	2.5525e-22	5	yes
	ENSG00000090238	YPEL3	16	30105935	ENSG00000261556	RP11-296I10.6	16	70266498	0.293993	0.0529651	2.84537e-08	5	yes
	ENSG00000102882	MAPK3	16	30130126	ENSG00000234719	RP11-166B2.1	16	12045865	-0.361775	0.0259923	4.88689e-44	4	yes
	ENSG00000102882	MAPK3	16	30130126	ENSG00000185864	NPIPB4	16	21869019	-0.241705	0.0433021	2.3801e-08	5	yes
	ENSG00000102882	MAPK3	16	30130126	ENSG00000243716	NPIPB5	16	22519142	-0.262293	0.0253539	4.3967e-25	4	yes
	ENSG00000102882	MAPK3	16	30130126	ENSG00000261556	RP11-296I10.6	16	70266498	-0.162955	0.0249848	6.92963e-11	4	yes
	ENSG00000005844	ITGAL	16	30509242	ENSG00000234719	RP11-166B2.1	16	12045865	0.821085	0.0557315	3.96416e-49	5	yes
	ENSG00000005844	ITGAL	16	30509242	ENSG00000185864	NPIPB4	16	21869019	0.519414	0.0851529	1.06215e-09	5	yes
	ENSG00000005844	ITGAL	16	30509242	ENSG00000243716	NPIPB5	16	22519142	0.696853	0.0510146	1.76302e-42	5	yes
	ENSG00000005844	ITGAL	16	30509242	ENSG00000261556	RP11-296I10.6	16	70266498	0.419556	0.04922	1.53998e-17	5	yes
	ENSG00000005844	ITGAL	16	30509242	ENSG00000005379	BZRAP1	17	56392372	-0.206855	0.0358477	7.90976e-09	4	yes
	ENSG00000196118	C16orf93	16	30771387	ENSG00000164512	ANKRD55	5	55462346	0.402224	0.062338	1.10155e-10	3	yes
	ENSG00000196118	C16orf93	16	30771387	ENSG00000100346	CACNA1I	22	40026250	0.37462	0.062472	2.01479e-09	3	yes
	ENSG00000103549	RNF40	16	30780347	ENSG00000162545	CAMK2N1	1	20810798	0.38077	0.061257	5.10202e-10	3	no
	ENSG00000103496	STX4	16	31049253	ENSG00000166171	DPCD	10	103349871	0.133303	0.0232263	9.50469e-09	3	yes
	ENSG00000103496	STX4	16	31049253	ENSG00000095932	C19orf77	19	3477472	0.149694	0.0255349	4.56456e-09	3	yes
	ENSG00000103496	STX4	16	31049253	ENSG00000138867	GUCD1	22	24944154	0.17112	0.025696	2.74958e-11	3	yes
	ENSG00000103496	STX4	16	31049253	ENSG00000100346	CACNA1I	22	40026250	-0.143959	0.0238311	1.53358e-09	3	yes
	ENSG00000167394	ZNF668	16	31078902	ENSG00000071967	CYBRD1	2	172396700	-0.142562	0.0240177	2.92546e-09	3	yes
	ENSG00000167394	ZNF668	16	31078902	ENSG00000164512	ANKRD55	5	55462346	0.155741	0.0242561	1.35667e-10	3	yes
	ENSG00000167394	ZNF668	16	31078902	ENSG00000100346	CACNA1I	22	40026250	0.145685	0.0244835	2.67594e-09	3	yes
	ENSG00000103507	BCKDK	16	31120769	ENSG00000164512	ANKRD55	5	55462346	0.169353	0.030161	1.96599e-08	6	yes
	ENSG00000103507	BCKDK	16	31120769	ENSG00000100346	CACNA1I	22	40026250	0.171817	0.030148	1.2043e-08	6	yes
	ENSG00000140853	NLRC5	16	57070420	ENSG00000111801	BTN3A3	6	26447171	0.476999	0.0471722	4.89417e-24	3	no
	ENSG00000184939	ZFP90	16	68586984	ENSG00000153898	MCOLN2	1	85427032	-0.203442	0.0115458	1.7147e-69	5	no
	ENSG00000184939	ZFP90	16	68586984	ENSG00000055732	MCOLN3	1	85498973	-0.0855262	0.0116359	1.97864e-13	5	no
	ENSG00000184939	ZFP90	16	68586984	ENSG00000162643	ENSG00000162643	1	85531825	-0.0915732	0.0126769	5.06273e-13	5	no
	ENSG00000184939	ZFP90	16	68586984	ENSG00000164649	CDCA7L	7	21963110	-0.143564	0.0115222	1.23756e-35	5	no
	ENSG00000184939	ZFP90	16	68586984	ENSG00000211694	TRGV10	7	38339667	-0.208444	0.0270658	1.34594e-14	5	no
	ENSG00000184939	ZFP90	16	68586984	ENSG00000105971	CAV2	7	116038014	-0.0853302	0.0114539	9.34299e-14	5	no
	ENSG00000184939	ZFP90	16	68586984	ENSG00000139187	KLRG1	12	9132998	-0.0755681	0.0115851	6.89697e-11	5	no
	ENSG00000184939	ZFP90	16	68586984	ENSG00000140948	ZCCHC14	16	87482751	-0.104024	0.0115084	1.58094e-19	5	no
	ENSG00000158792	SPATA2L	16	89765432	ENSG00000237094	RP4-669L17.10	1	385834	-0.363318	0.0613892	3.25341e-09	3	no
	ENSG00000158792	SPATA2L	16	89765432	ENSG00000166997	CNPY4	7	99720185	-0.160519	0.0255364	3.25983e-10	3	no
	ENSG00000158792	SPATA2L	16	89765432	ENSG00000166816	LDHD	16	75148213	0.154673	0.0255353	1.38495e-09	3	no
	ENSG00000158792	SPATA2L	16	89765432	ENSG00000213820	ENSG00000213820	20	44728486	0.693742	0.0697737	2.71242e-23	3	no
	ENSG00000075399	VPS9D1	16	89780468	ENSG00000237683	AL627309.1	1	137140	1.15127	0.112979	2.19521e-24	3	yes
	ENSG00000075399	VPS9D1	16	89780468	ENSG00000239906	RP11-34P13.14	1	140064	0.844774	0.106777	2.54157e-15	3	yes
	ENSG00000075399	VPS9D1	16	89780468	ENSG00000241860	RP11-34P13.13	1	157668	0.685422	0.104867	6.3135e-11	3	yes
	ENSG00000075399	VPS9D1	16	89780468	ENSG00000077684	PHF17	4	129763579	0.381364	0.04484	1.81587e-17	3	yes
	ENSG00000075399	VPS9D1	16	89780468	ENSG00000230724	LINC01001	11	133116	0.846899	0.107286	2.92968e-15	3	yes
	ENSG00000141002	TCF25	16	89958896	ENSG00000237683	AL627309.1	1	137140	1.08049	0.121255	5.06304e-19	3	yes
	ENSG00000141002	TCF25	16	89958896	ENSG00000239906	RP11-34P13.14	1	140064	0.836812	0.115275	3.89245e-13	3	yes
	ENSG00000141002	TCF25	16	89958896	ENSG00000241860	RP11-34P13.13	1	157668	0.67205	0.115176	5.37885e-09	3	yes
	ENSG00000141002	TCF25	16	89958896	ENSG00000077684	PHF17	4	129763579	0.65902	0.0541225	4.14977e-34	3	yes
	ENSG00000141002	TCF25	16	89958896	ENSG00000225119	LINC00999	10	38726947	0.741986	0.113675	6.69843e-11	3	yes
	ENSG00000141002	TCF25	16	89958896	ENSG00000230724	LINC01001	11	133116	0.81185	0.117933	5.82074e-12	3	yes
	ENSG00000258839	MC1R	16	89982956	ENSG00000233750	CICP27	1	132930	0.398731	0.0658694	1.4185e-09	3	yes
	ENSG00000258839	MC1R	16	89982956	ENSG00000170128	GPR25	1	200842694	0.304674	0.0271077	2.61171e-29	3	yes
	ENSG00000258839	MC1R	16	89982956	ENSG00000225119	LINC00999	10	38726947	0.404498	0.0638263	2.33541e-10	3	yes
	ENSG00000260528	FAM157C	16	90206275	ENSG00000237094	RP4-669L17.10	1	385834	0.560371	0.0750545	8.25534e-14	5	no
	ENSG00000260528	FAM157C	16	90206275	ENSG00000213820	ENSG00000213820	20	44728486	-0.712727	0.0818537	3.11133e-18	5	no
	ENSG00000108523	RNF167	17	4845910	ENSG00000151445	VIPAS39	14	77908656	-0.160251	0.02503	1.52987e-10	5	no
	ENSG00000091640	SPAG7	17	4866844	ENSG00000136689	IL1RN	2	113878192	-0.103491	0.0169353	9.90235e-10	5	yes
	ENSG00000167536	DHRS13	17	27227444	ENSG00000162366	PDZK1IP1	1	47652990	-0.324565	0.0425202	2.29025e-14	3	yes
	ENSG00000167536	DHRS13	17	27227444	ENSG00000143727	ACP1	2	271211	-0.23607	0.0419507	1.83029e-08	3	yes
	ENSG00000167536	DHRS13	17	27227444	ENSG00000125037	EMC3	3	10028510	-0.597795	0.0859602	3.5424e-12	3	yes
	ENSG00000167536	DHRS13	17	27227444	ENSG00000145423	SFRP2	4	154706008	-0.251579	0.0421595	2.41167e-09	3	yes
	ENSG00000167536	DHRS13	17	27227444	ENSG00000237075	RP11-497H16.2	5	69785194	-0.315726	0.0514505	8.43626e-10	3	yes
	ENSG00000167536	DHRS13	17	27227444	ENSG00000158856	DMTN	8	21923272	-0.262637	0.0467772	1.9698e-08	3	yes
	ENSG00000167536	DHRS13	17	27227444	ENSG00000133742	CA1	8	86265540	-0.424258	0.0439813	5.09561e-22	3	yes
	ENSG00000167536	DHRS13	17	27227444	ENSG00000136929	HEMGN	9	100698105	-0.364634	0.0427229	1.40338e-17	3	yes
	ENSG00000167536	DHRS13	17	27227444	ENSG00000068971	PPP2R5B	11	64693486	-0.331754	0.0435337	2.52451e-14	3	yes
	ENSG00000167536	DHRS13	17	27227444	ENSG00000198336	MYL4	17	45289428	-0.4192	0.0431858	2.81821e-22	3	yes
	ENSG00000167536	DHRS13	17	27227444	ENSG00000173868	PHOSPHO1	17	47304426	-0.276238	0.0430982	1.4598e-10	3	yes
	ENSG00000167536	DHRS13	17	27227444	ENSG00000104892	KLC3	19	45845735	-0.266122	0.0422581	3.02394e-10	3	yes
	ENSG00000167536	DHRS13	17	27227444	ENSG00000125818	PSMF1	20	1121464	-0.271784	0.0420227	9.96116e-11	3	yes
	ENSG00000167536	DHRS13	17	27227444	ENSG00000088826	SMOX	20	4135010	-0.315932	0.0425856	1.1824e-13	3	yes
	ENSG00000167536	DHRS13	17	27227444	ENSG00000198959	TGM2	20	36775921	-0.267875	0.0423665	2.5686e-10	3	yes
	ENSG00000167536	DHRS13	17	27227444	ENSG00000133488	SEC14L4	22	30893299	-0.228392	0.0418112	4.69599e-08	3	yes
	ENSG00000141298	SSH2	17	28105125	ENSG00000103326	CAPN15	16	591176	0.149983	0.0181189	1.25587e-16	3	no
	ENSG00000108578	BLMH	17	28597146	ENSG00000103326	CAPN15	16	591176	0.411015	0.04826	1.64189e-17	3	no
	ENSG00000161395	PGAP3	17	37840212	ENSG00000171476	HOPX	4	57531110	0.158544	0.0269934	4.26859e-09	3	yes
	ENSG00000161395	PGAP3	17	37840212	ENSG00000106537	TSPAN13	7	16808660	0.143701	0.0260117	3.30441e-08	3	yes
	ENSG00000161395	PGAP3	17	37840212	ENSG00000147535	PPAPDC1B	8	38123704	0.149097	0.025963	9.32039e-09	3	yes
	ENSG00000161395	PGAP3	17	37840212	ENSG00000149294	NCAM1	11	112990577	0.175374	0.0265011	3.65051e-11	3	yes
	ENSG00000161395	PGAP3	17	37840212	ENSG00000160683	CXCR5	11	118761491	0.15893	0.0285627	2.63302e-08	3	yes
	ENSG00000161395	PGAP3	17	37840212	ENSG00000100721	TCL1A	14	96178418	0.172975	0.0270252	1.54883e-10	3	yes
	ENSG00000161395	PGAP3	17	37840212	ENSG00000104921	FCER2	19	7760338	0.158487	0.0263822	1.88603e-09	3	yes
	ENSG00000161395	PGAP3	17	37840212	ENSG00000167483	FAM129C	19	17649379	0.189084	0.0261823	5.12904e-13	3	yes
	ENSG00000161395	PGAP3	17	37840212	ENSG00000128218	VPREB3	22	24095792	0.159365	0.0264848	1.77414e-09	3	yes
	ENSG00000161395	PGAP3	17	37840212	ENSG00000133424	LARGE	22	33993838	0.159189	0.0257284	6.1207e-10	3	yes
	ENSG00000141736	ERBB2	17	37865423	ENSG00000115523	GNLY	2	85919137	0.594239	0.0663426	3.33239e-19	6	yes
	ENSG00000141736	ERBB2	17	37865423	ENSG00000144645	OSBPL10	3	31909227	0.255447	0.0453921	1.82756e-08	8	yes
	ENSG00000141736	ERBB2	17	37865423	ENSG00000004468	CD38	4	15815483	0.446187	0.0567761	3.88095e-15	7	yes
	ENSG00000141736	ERBB2	17	37865423	ENSG00000171604	CXXC5	5	139045175	0.326338	0.048083	1.14512e-11	7	yes
	ENSG00000141736	ERBB2	17	37865423	ENSG00000180644	PRF1	10	72359817	0.691233	0.0706852	1.38525e-22	7	yes
	ENSG00000141736	ERBB2	17	37865423	ENSG00000172543	CTSW	11	65649246	0.264314	0.045761	7.65097e-09	8	yes
	ENSG00000141736	ERBB2	17	37865423	ENSG00000134539	KLRD1	12	10424253	0.349583	0.0609089	9.49908e-09	6	yes
	ENSG00000141736	ERBB2	17	37865423	ENSG00000141622	RNF165	18	43974937	0.786549	0.0670296	8.49692e-32	7	yes
	ENSG00000161405	IKZF3	17	37970819	ENSG00000143185	XCL2	1	168511619	-0.263003	0.0432307	1.17442e-09	3	yes
	ENSG00000161405	IKZF3	17	37970819	ENSG00000135862	LAMC1	1	183053661	-0.121512	0.0200151	1.27094e-09	3	yes
	ENSG00000161405	IKZF3	17	37970819	ENSG00000133056	PIK3C2B	1	204427804	-0.124988	0.0201361	5.39597e-10	3	yes
	ENSG00000161405	IKZF3	17	37970819	ENSG00000117322	CR2	1	207645407	-0.127057	0.0201489	2.86551e-10	3	yes
	ENSG00000161405	IKZF3	17	37970819	ENSG00000117009	KMO	1	241727189	-0.124521	0.020073	5.52589e-10	3	yes
	ENSG00000161405	IKZF3	17	37970819	ENSG00000144218	AFF3	2	100461459	-0.127501	0.0219793	6.593e-09	3	yes
	ENSG00000161405	IKZF3	17	37970819	ENSG00000171476	HOPX	4	57531110	-0.163051	0.0202418	7.93613e-16	3	yes
	ENSG00000161405	IKZF3	17	37970819	ENSG00000035720	STAP1	4	68448750	-0.176284	0.0220416	1.26684e-15	3	yes
	ENSG00000161405	IKZF3	17	37970819	ENSG00000164056	SPRY1	4	124321430	-0.110007	0.0200718	4.23662e-08	3	yes
	ENSG00000161405	IKZF3	17	37970819	ENSG00000145649	GZMA	5	54402278	-0.115635	0.0199002	6.22008e-09	3	yes
	ENSG00000161405	IKZF3	17	37970819	ENSG00000112182	BACH2	6	90821437	-0.111565	0.0201257	2.96675e-08	3	yes
	ENSG00000161405	IKZF3	17	37970819	ENSG00000174469	CNTNAP2	7	146965771	-0.111122	0.0200201	2.84817e-08	3	yes
	ENSG00000161405	IKZF3	17	37970819	ENSG00000236901	MIR600HG	9	125874764	-0.141434	0.0224023	2.73074e-10	3	yes
	ENSG00000161405	IKZF3	17	37970819	ENSG00000165209	STRBP	9	125951317	-0.122654	0.0200627	9.74578e-10	3	yes
	ENSG00000161405	IKZF3	17	37970819	ENSG00000149294	NCAM1	11	112990577	-0.199137	0.0203123	1.08482e-22	3	yes
	ENSG00000161405	IKZF3	17	37970819	ENSG00000160683	CXCR5	11	118761491	-0.168277	0.0221976	3.43363e-14	3	yes
	ENSG00000161405	IKZF3	17	37970819	ENSG00000139174	PRICKLE1	12	42918148	-0.146005	0.0220267	3.38976e-11	3	yes
	ENSG00000161405	IKZF3	17	37970819	ENSG00000213231	TCL1B	14	96155867	-0.158211	0.0223515	1.45925e-12	3	yes
	ENSG00000161405	IKZF3	17	37970819	ENSG00000077238	IL4R	16	27350544	-0.140184	0.020186	3.79588e-12	3	yes
	ENSG00000161405	IKZF3	17	37970819	ENSG00000108370	RGS9	17	63178685	-0.113182	0.020046	1.64127e-08	3	yes
	ENSG00000161405	IKZF3	17	37970819	ENSG00000141622	RNF165	18	43974937	-0.126152	0.0201326	3.70274e-10	3	yes
	ENSG00000161405	IKZF3	17	37970819	ENSG00000104921	FCER2	19	7760338	-0.186987	0.0202469	2.57555e-20	3	yes
	ENSG00000161405	IKZF3	17	37970819	ENSG00000160307	S100B	21	48021998	-0.222058	0.0300392	1.44347e-13	3	yes
	ENSG00000161405	IKZF3	17	37970819	ENSG00000133424	LARGE	22	33993838	-0.14757	0.0199532	1.40591e-13	3	yes
	ENSG00000073605	GSDMB	17	38068477	ENSG00000069702	TGFBR3	1	92258897	0.0589823	0.00959894	8.01294e-10	5	yes
	ENSG00000073605	GSDMB	17	38068477	ENSG00000132185	FCRLA	1	161680452	0.0741549	0.00962431	1.30884e-14	5	yes
	ENSG00000073605	GSDMB	17	38068477	ENSG00000143185	XCL2	1	168511619	0.120091	0.0210508	1.16447e-08	5	yes
	ENSG00000073605	GSDMB	17	38068477	ENSG00000135862	LAMC1	1	183053661	0.0528193	0.00968721	4.96734e-08	5	yes
	ENSG00000073605	GSDMB	17	38068477	ENSG00000135842	FAM129A	1	184851770	0.0573633	0.0096482	2.75618e-09	3	yes
	ENSG00000073605	GSDMB	17	38068477	ENSG00000133056	PIK3C2B	1	204427804	0.0651287	0.0096519	1.50143e-11	5	yes
	ENSG00000073605	GSDMB	17	38068477	ENSG00000117322	CR2	1	207645407	0.0704511	0.00964005	2.70817e-13	5	yes
	ENSG00000073605	GSDMB	17	38068477	ENSG00000082512	TRAF5	1	211524122	0.0530893	0.00960777	3.28237e-08	5	yes
	ENSG00000073605	GSDMB	17	38068477	ENSG00000197520	FAM177B	1	222917348	0.0581866	0.0096012	1.35831e-09	5	yes
	ENSG00000073605	GSDMB	17	38068477	ENSG00000117009	KMO	1	241727189	0.0682308	0.00964516	1.50426e-12	5	yes
	ENSG00000073605	GSDMB	17	38068477	ENSG00000119866	BCL11A	2	60729502	0.0729423	0.00965018	4.07277e-14	5	yes
	ENSG00000073605	GSDMB	17	38068477	ENSG00000115523	GNLY	2	85919137	0.0623683	0.00960059	8.23182e-11	5	yes
	ENSG00000073605	GSDMB	17	38068477	ENSG00000144218	AFF3	2	100461459	0.0682197	0.0105348	9.43894e-11	5	yes
	ENSG00000073605	GSDMB	17	38068477	ENSG00000115607	IL18RAP	2	103052087	0.0693745	0.00960745	5.16423e-13	5	yes
	ENSG00000073605	GSDMB	17	38068477	ENSG00000150995	ITPR1	3	4712278	0.0555782	0.00960332	7.1485e-09	5	yes
	ENSG00000073605	GSDMB	17	38068477	ENSG00000186265	BTLA	3	112200611	0.0726304	0.00964049	4.92502e-14	5	yes
	ENSG00000073605	GSDMB	17	38068477	ENSG00000174123	TLR10	4	38779235	0.0594817	0.00960061	5.80586e-10	4	yes
[truncated: 353 more rows]

## Sheet: Table S2
	Table S2. The outcome of simulation analysis based on 1000 random gene-sets drawn from the eQTLGen database
	Geneset number	Go term	Description	P-value
	101	GO:0042743	Hydrogen peroxide metabolic process	0.000516137
	126	GO:0045054	Constitutive secretory pathway	0.0482134
	895	GO:1901565	Organonitrogen compound catabolic process	0.000304366
	895	GO:1901575	Organic substance catabolic process	0.0184557
	895	GO:0030163	Protein catabolic process	0.0220653

## Sheet: Table S3
	Table S3. The outcome of PheWAS analysis to idenify traits associated with the hub genes of network.
	Trait information		Gene	Mendelian randomization
	Trait	Source		B	SE	P	NSNP
	Basophil cell count	PMID: 32888494	CREB5	-0.0576888	0.00385335	1.13495e-50	24
	Basophill percentage	UKBB		-0.0270552	0.00438575	6.87741e-10	25
	Neutrophil cell count	PMID: 32888494		-0.125483	0.00398119	4.77715e-218	22
	Sum of neutrophil and eosinophil counts	PMID: 27863252		0.134994	0.00695385	6.01754e-84	23
	White blood cell count	PMID: 32888494		-0.105384	0.00368052	2.62605e-180	23
	Eosinophill percentage	UKBB		0.0281103	0.00451094	4.61771e-10	23
	Granulocyte percentage of myeloid white cells	PMID: 27863252		0.0998027	0.00685377	4.91968e-48	23
	Lymphocyte percentage	UKBB		0.0852529	0.00460058	1.16271e-76	23
	Monocyte percentage	PMID: 27863252		-0.0753123	0.00668004	1.7592e-29	23
	Neutrophill percentage	UKBB		-0.0943193	0.00467987	2.46852e-90	23
	Basophil cell count	PMID: 32888494	GSDMB	0.0301512	0.00216077	2.97775e-44	45
	Lymphocyte cell count	PMID: 32888494		0.0302752	0.00195033	2.42046e-54	58
	Monocyte cell count	PMID: 32888494		0.01224	0.00198378	6.82802e-10	53
	Neutrophil cell count	PMID: 32888494		0.0663611	0.00230919	1.2887e-181	23
	White blood cell count	PMID: 32888494		0.0687041	0.0021648	4.818e-221	28
	Lymphocyte percentage	UKBB		-0.0235173	0.00251045	7.40811e-21	37
	Mean reticulocyte volume	UKBB		-0.014363	0.00248223	7.19443e-09	48
	Monocyte percentage	PMID: 27863252		0.0487617	0.00353825	3.30205e-43	54
	Neutrophill percentage	UKBB		0.0336121	0.0025552	1.60658e-39	34
	Atrial fibrillation	PMID: 36653681		0.0498624	0.0065043	1.7736e-14	26
	Allergic disease (asthma, hay fever or eczema)	PMID: 29083406		0.0649516	0.00578422	2.93449e-29	51
	Primary biliary cirrhosis	PMID: 22961000		-0.261859	0.0331936	3.05006e-15	28
	Eosinophill percentage	UKBB		-0.0168984	0.00240959	2.33321e-12	51
	Primary biliary cholangitis	PMID: 26394269		-0.244375	0.0361912	1.45475e-11	18
	Granulocyte percentage of myeloid white cells	PMID: 27863252		-0.0507382	0.00359611	3.33339e-45	51
	Asthma	PMID: 32296059		0.111954	0.00618921	3.9221e-73	55
	Rheumatoid arthritis	PMID: 24390342		-0.107319	0.0131746	3.76539e-16	32
	HDL cholesterol	PMID: 32203549		-0.024927	0.00205338	6.52417e-34	46
	Crohn's disease	PMID: 26192919		-0.155368	0.0225999	6.21198e-12	61
	Ulcerative colitis	PMID: 26192919		-0.150367	0.0207984	4.83947e-13	62
	Liver enzyme levels (alkaline phosphatase)	PMID: 33972514		0.00262265	0.000312918	5.23608e-17	58
	T1D	PMID: 34127860		-0.136827	0.012866	2.05341e-26	41
	Lymphocyte cell count	PMID: 32888494	HHEX	-0.0543545	0.00613009	7.52595e-19	14
	Neutrophil cell count	PMID: 32888494		0.0372926	0.00616742	1.47836e-09	12
	Eosinophill count	UKBB		0.0683515	0.00620896	3.47662e-28	10
	Eosinophill percentage	UKBB		0.129868	0.0103575	4.59423e-36	11
	Lymphocyte percentage	UKBB		-0.0730688	0.00778915	6.54496e-21	12
	Mean platelet volume	UKBB		-0.0490794	0.00750906	6.31741e-11	13
	Neutrophill percentage	UKBB		0.0722241	0.0095359	3.62132e-14	10
	Triglycerides	PMID: 32203549		-0.0406366	0.00628596	1.01528e-10	9
	T2D	PMID: 30297969		-0.233633	0.0205599	6.35562e-30	11
	Basophil cell count	PMID: 32888494	ITGA4	-0.0300105	0.00346286	4.46034e-18	31
	Lymphocyte cell count	PMID: 32888494		-0.0238311	0.00333173	8.50442e-13	23
	Monocyte cell count	PMID: 32888494		-0.144027	0.00513521	4.35797e-173	22
	Neutrophil cell count	PMID: 32888494		-0.0404608	0.00324037	8.8513e-36	33
	White blood cell count	PMID: 32888494		-0.0545438	0.00429235	5.39208e-37	24
	Eosinophill count	UKBB		-0.0193585	0.00292717	3.75636e-11	33
	Granulocyte count	PMID: 27863252		0.0484198	0.00592513	3.03484e-16	33
	Granulocyte percentage of myeloid white cells	PMID: 27863252		-0.0927075	0.00751526	5.80342e-35	26
	Mean reticulocyte volume	UKBB		-0.0315144	0.00399882	3.24964e-15	31
	Mean sphered cell volume	UKBB		-0.0283823	0.00395756	7.40879e-13	33
	Monocyte percentage	PMID: 27863252		0.0991968	0.00757814	3.76295e-39	24
	Sum of neutrophil and eosinophil counts	PMID: 27863252		0.0483839	0.0059199	3.00572e-16	33
	Basophil cell count	PMID: 32888494	NFE2	0.0241135	0.00404304	2.45815e-09	15
	Monocyte cell count	PMID: 32888494		0.0474405	0.00375623	1.44631e-36	16
	Eosinophill count	UKBB		0.0224182	0.0034677	1.01398e-10	17
	Eosinophill percentage	UKBB		0.0369224	0.00461556	1.24875e-15	17
	Granulocyte percentage of myeloid white cells	PMID: 27863252		0.0443427	0.0068648	1.05101e-10	17
	Mean corpuscular haemoglobin	UKBB		-0.0357468	0.0046293	1.14655e-14	17
	Mean corpuscular volume	UKBB		-0.0506944	0.00467886	2.35559e-27	16
	Mean platelet volume	UKBB		-0.106521	0.00496362	3.64772e-102	10
	Mean reticulocyte volume	UKBB		-0.0376418	0.00470718	1.27827e-15	17
	Mean sphered cell volume	UKBB		-0.0532597	0.00473224	2.19728e-29	16
	Monocyte percentage	PMID: 27863252		-0.0478242	0.00682633	2.45496e-12	17
	Platelet distribution width	UKBB		-0.0434486	0.00464118	7.85878e-21	13
	Platelet count	PMID: 27863252		-0.0579581	0.00703469	1.73811e-16	14
	Red blood cell count	UKBB		0.0248686	0.00399299	4.72254e-10	16
	Red blood cell distribution width	UKBB		0.0689308	0.00483696	4.42805e-46	16
	Basophil cell count	PMID: 32888494	ORMDL3	0.0339827	0.00254561	1.19147e-40	35
	Lymphocyte cell count	PMID: 32888494		0.0356168	0.00227825	4.31154e-55	49
	Monocyte cell count	PMID: 32888494		0.0148625	0.00231611	1.38967e-10	43
	Neutrophil cell count	PMID: 32888494		0.0798137	0.00272465	1.26724e-188	20
	White blood cell count	PMID: 32888494		0.0813476	0.00255639	3.29227e-222	23
	Atrial fibrillation	PMID: 36653681		0.0545925	0.00738877	1.48419e-13	27
	Allergic disease (asthma, hay fever or eczema)	PMID: 29083406		0.0708233	0.00675775	1.064e-25	46
	Primary biliary cirrhosis	PMID: 22961000		-0.277339	0.0386774	7.46803e-13	28
	Eosinophill percentage	UKBB		-0.0201874	0.00280214	5.83423e-13	44
	Primary biliary cholangitis	PMID: 26394269		-0.253734	0.0404464	3.53376e-10	21
	Granulocyte percentage of myeloid white cells	PMID: 27863252		-0.0614097	0.00423461	1.17925e-47	42
	Asthma	PMID: 32296059		0.128602	0.00752333	1.65272e-65	45
	Rheumatoid arthritis	PMID: 24390342		-0.118817	0.0148856	1.43956e-15	35
	HDL cholesterol	PMID: 32203549		-0.0303931	0.00237721	1.98367e-37	39
	Crohn's disease	PMID: 26192919		-0.163433	0.0263958	5.95467e-10	52
	Ulcerative colitis	PMID: 26192919		-0.167786	0.0243263	5.29999e-12	53
	Liver enzyme levels (alkaline phosphatase)	PMID: 33972514		0.00275686	0.000350732	3.83277e-15	49
	Lymphocyte percentage	UKBB		-0.0275432	0.00294065	7.50762e-21	27
	Monocyte percentage	PMID: 27863252		0.0554894	0.00415404	1.06488e-40	45
	Neutrophill percentage	UKBB		0.0405488	0.00297008	1.95336e-42	27
	Primary biliary cholangitis	PMID: 26394269		-0.253734	0.0404464	3.53376e-10	21
	T1D	PMID: 34127860		-0.143806	0.0152602	4.35969e-21	40
	Neutrophil cell count	PMID: 32888494	SCGB1C1	-0.0241245	0.00428577	1.81269e-08	7
	Liver enzyme levels (alkaline phosphatase)	PMID: 33972514		-0.00720268	0.000961326	6.76029e-14	6
	Mean platelet volume	UKBB		-0.127494	0.00877656	8.21657e-48	4
	Platelet distribution width	UKBB		0.0365875	0.00494947	1.44429e-13	5
	Platelet count	PMID: 27863252		-0.13106	0.00752105	5.26236e-68	9
	Plateletcrit	PMID: 27863252		-0.0590294	0.00708426	7.91671e-17	9
	Platelet distribution width	UKBB		0.0160058	0.00249298	1.35951e-10	6
	White blood cell count	PMID: 32888494	SMOX	-0.0216128	0.00375055	8.28427e-09	32
	High light scatter reticulocyte count	UKBB		0.220783	0.00795349	1.34808e-169	27
	High light scatter reticulocyte percentage	UKBB		0.224807	0.00801658	4.90313e-173	27
	Immature reticulocyte fraction	UKBB		0.156908	0.00702402	1.55322e-110	28
	Mean corpuscular haemoglobin	UKBB		-0.0547113	0.00513843	1.79145e-26	30
	Mean corpuscular volume	UKBB		-0.0324571	0.00482607	1.75132e-11	31
	Mean reticulocyte volume	UKBB		-0.0438555	0.00500448	1.89685e-18	30
	Red blood cell distribution width	UKBB		0.0271364	0.00464172	5.02907e-09	33
	Reticulocyte count	PMID: 27863252		0.270874	0.0120724	1.69438e-111	27
	Reticulocyte percentage	UKBB		0.234328	0.00903842	3.41037e-148	24

## Sheet: Table S4
	Table S4. The outcome of conditional analysis to investigate the path through which a hub gene impact a trait
	Predictor	Trait name	Original					Adjusted						Magnitude of change
			B	SE	P	NSNP	Z-Score	Covariate	B	SE	P	NSNP	Z-Score	Z	P
	GSDMB	Asthma	0.111714	0.00621446	2.97802e-72	56	17.9765	White blood cell count	0.110456	0.00621434	1.1158e-70	56	17.7744	0.202088	0.839848
		Allergic disease	0.0635757	0.00581538	8.07363e-28	51	10.9323		0.0618662	0.00581469	1.94885e-26	51	10.6396	0.292699	0.769752
		Atrial fibrillation	0.0502027	0.00649868	1.118e-14	26	7.72506		0.0493127	0.00649857	3.24276e-14	26	7.58824	0.136822	0.891171
		Type 1 diabetes	-0.136328	0.012902	4.26485e-26	41	-10.5664		-0.110906	0.0128679	6.76452e-18	41	-8.61881	-1.94761	0.0514613
		Rheumatoid arthritis	-0.107035	0.0131677	4.34324e-16	31	-8.1286		-0.107369	0.0131677	3.52091e-16	31	-8.15397	0.0253651	0.979764
		HDL cholesterol	-0.0248284	0.00205526	1.34051e-33	46	-12.0804		-0.0222812	0.00203197	5.61144e-28	49	-10.9653	-1.1151	0.264808
		Crohn's disease	-0.154894	0.022812	1.12135e-11	61	-6.79002		-0.156892	0.0228103	6.06438e-12	61	-6.87812	0.0880981	0.929799
		Ulcerative colitis	-0.149812	0.0209671	8.99278e-13	62	-7.1451		-0.156343	0.0209668	8.87333e-14	62	-7.45669	0.311595	0.755349
		Alkaline phosphatase	0.00269818	0.000314768	1.0172e-17	59	8.57196		0.0023552	0.000313351	5.64031e-14	59	7.51617	1.05579	0.291063
	ORMDL3	Asthma	0.128186	0.00754684	1.05383e-64	46	16.9854	White blood cell count	0.126693	0.00754363	2.66827e-63	46	16.7947	0.190688	0.84877
		Allergic disease	0.0701944	0.00678289	4.24046e-25	46	10.3487		0.067295	0.006779	3.17742e-23	48	9.92698	0.421765	0.673197
		Atrial fibrillation	0.0545688	0.0073883	1.51486e-13	27	7.38584		0.0535108	0.00738836	4.40224e-13	27	7.24258	0.143258	0.886086
		Type 1 diabetes	-0.143295	0.0152914	7.18616e-21	40	-9.37095		-0.114411	0.0152491	6.24631e-14	40	-7.5028	-1.86815	0.0617411
		Rheumatoid arthritis	-0.117798	0.0148976	2.63266e-15	34	-7.90718		-0.118183	0.0148977	2.13988e-15	34	-7.93297	0.0257898	0.979425
		HDL cholesterol	-0.0302897	0.00238085	4.45205e-37	39	-12.7222		-0.0268487	0.00236346	6.62154e-30	41	-11.3599	-1.36231	0.173101
		Crohn's disease	-0.162405	0.0267165	1.21052e-09	52	-6.07883		-0.16448	0.0267162	7.4349e-10	52	-6.15656	0.0777365	0.938038
		Ulcerative colitis	-0.170757	0.0246105	3.96611e-12	53	-6.93838		-0.177466	0.0246114	5.56528e-13	53	-7.21072	0.272344	0.785358
		Alkaline phosphatase	0.00286281	0.000347645	1.79774e-16	51	8.23487		0.0026046	0.000342349	2.78296e-14	52	7.60803	0.62684	0.530764
	HHEX	TG	-0.0406366	0.00628596	1.01528e-10	9	-6.46466	Mean platelet volume	-0.0405761	0.00628605	1.0826e-10	9	-6.45494	-0.00971704	0.992247
		T2D	-0.233633	0.0205599	6.35562e-30	11	-11.3635		-0.233987	0.0205619	5.28077e-30	11	-11.3796	0.016111	0.987146
		TG	-0.0406366	0.00628596	1.01528e-10	9	-6.46466	Lymphocyte percentage	-0.0401288	0.00628295	1.69236e-10	9	-6.38694	-0.0777249	0.938047
		T2D	-0.233633	0.0205599	6.35562e-30	11	-11.3635		-0.236252	0.020569	1.55428e-30	11	-11.4858	0.1223	0.902661
		TG	-0.0406366	0.00628596	1.01528e-10	9	-6.46466	T2D	-0.0276968	0.00638494	1.43899e-05	13	-4.33783	-2.12683	0.0334343
		T2D	-0.233633	0.0205599	6.35562e-30	11	-11.3635	TG	-0.225065	0.0204337	3.25583e-28	11	-11.0144	-0.349125	0.726995

## Sheet: Table S5
	Table S5. Number of trans-eQTLs reported for each trait in the eQTLGen study *
	Input data was obtained from the original eQTLGen study (Table S3 in PMID: 34475573)
	Trait	Number of reported trans-eQTLs
	Height	703
	Crohn's_disease	545
	Body_mass_index	501
	Inflammatory_bowel_disease	442
	Post_bronchodilator_FEV1/FVC_ratio	380
	Platelet_count	372
	Rheumatoid_arthritis	352
	Post_bronchodilator_FEV1	332
	Schizophrenia	308
	Multiple_sclerosis	308
	Ulcerative_colitis	304
	HDL_cholesterol	281
	Waist-to-hip_ratio_adjusted_for_body_mass_index	280
	Blood_metabolite_levels	271
	Mean_platelet_volume	264
	Systemic_lupus_erythematosus	230
	Type_1_diabetes	228
	LDL_cholesterol	206
	Cholesterol,_total	205
	Prostate_cancer	203
	Type_2_diabetes	193
	Triglycerides	193
	Psoriasis	173
	Menarche_(age_at_onset)	165
	IgG_glycosylation	157
	Mature_red_cell;MCV	150
	Celiac_disease	149
	Parkinson's_disease	141
	Mature_red_cell;MCH	122
	Myeloid_white_cell;MONO#	120
	Mature_red_cell;RDW	120
	Breast_cancer	120
	Lymphoid_white_cell;LYMPH#	118
	Bone_mineral_density	115
	Platelet;PDW	114
	Liver_Cirrhosis,_Biliary	112
	QT_interval	107
	Compound_white_cell;MONO%	105
	Obesity	92
	Metabolite_levels	92
	Lipid_metabolism_phenotypes	90
	Colorectal_cancer	85
	Red_blood_cell_count	79
	Blood_pressure	78
	Compound_white_cell;EO%	73
	Red_blood_cell_traits	71
	C-reactive_protein_levels	70
	Primary_biliary_cirrhosis	69
	Myeloid_white_cell;EO#	67
	Mature_red_cell;HCT	66
	Thyroid_hormone_levels	61
	Systolic_blood_pressure	60
	Phospholipid_levels_(plasma)	59
	Coronary_heart_disease	58
	Urate_levels	57
	Coronary_artery_disease	57
	Inflammatory_skin_disease	56
	Blood_metabolite_ratios	56
	Myeloid_white_cell;GRAN%MYELOID	55
	Immature_red_cell;IRF	55
	Vitiligo	54
	Diastolic_blood_pressure	51
	Atopic_dermatitis	51
	Optic_cup_area	49
	Age-related_macular_degeneration	49
	Age-related_hearing_impairment_(interaction)	49
	Immature_red_cell;RET%	48
	Metabolic_traits	47
	Immature_red_cell;RET#	46
	Advanced_age-related_macular_degeneration	46
	Myeloid_white_cell;(EO+BASO)#	44
	Fibrinogen_levels	43
	Chronic_lymphocytic_leukemia	43
	Glycerophospholipid_levels	42
	Compound_white_cell;WBC#	42
	Immature_red_cell;HLSR%	41
	Alzheimer's_disease_(late_onset)	41
	Mean_corpuscular_volume	39
	Testicular_germ_cell_tumor	38
	Fibrinogen	38
	Cognitive_decline_rate_in_late_mild_cognitive_impairment	38
	Venous_thromboembolism_(gene_x_gene_interaction)	37
	Myopia_(pathological)	37
	Immature_red_cell;HLSR#	37
	Urinary_metabolites_(H-NMR_features)	36
	Adiponectin_levels	36
	Motion_sickness	35
	Mature_red_cell;HGB	35
	Compound_white_cell;LYMPH%	35
	Spondylitis,_Ankylosing	34
	Optic_disc_area	33
	Liver_enzyme_levels_(gamma-glutamyl_transferase)	33
	Trans_fatty_acid_levels	32
	Subcortical_brain_region_volumes	32
	Corneal_structure	32
	3-hydroxypropylmercapturic_acid_levels_in_smokers	32
	White_blood_cell_count	31
	Pulmonary_function	31
	Psoriasis_vulgaris	31
	Pediatric_autoimmune_diseases	31
	Metabolic_syndrome	31
	Mean_corpuscular_hemoglobin	31
	Local_histogram_emphysema_pattern	31
	Myeloid_white_cell;EO%GRAN	30
	Fasting_glucose-related_traits	30
	Compound_white_cell;BASO%	30
	Basal_cell_carcinoma	30
	Sex_hormone-binding_globulin_levels	29
	Myeloid_white_cell;NEUT#	29
	Leprosy	29
	Iron_status_biomarkers	29
	Compound_white_cell;NEUT%	29
	Refractive_error	28
	Menopause_(age_at_onset)	28
	Glycated_hemoglobin_levels	28
	Chronic_kidney_disease	28
	Childhood_body_mass_index	28
	Asthma	28
	Urinary_metabolites	27
	Myocardial_infarction	27
	Myeloid_white_cell;MYELOID#	27
	Mature_red_cell;MCHC	27
	IgA_nephropathy	27
	Warfarin_maintenance_dose	26
	Severe_influenza_A_(H1N1)_infection	26
	Lung_cancer	26
	Bilirubin_levels	26
	Alzheimer's_disease	26
	Acute_lymphoblastic_leukemia_(childhood)	26
	Vertical_cup-disc_ratio	25
	PR_interval	25
	Myeloid_white_cell;BASO#	25
	Heart_rate	25
	Celiac_disease_or_Rheumatoid_arthritis	25
	Pancreatic_cancer	24
	Myeloid_white_cell;NEUT%GRAN	24
	Hematological_and_biochemical_traits	24
	Fasting_plasma_glucose	24
	Bone_mineral_density_(spine)	24
	Waist-hip_ratio	23
	Polycystic_ovary_syndrome	23
	Obesity-related_traits	23
	Glioma	23
	End-stage_coagulation	23
	Sphingolipid_levels	22
	Fasting_glucose-related_traits_(interaction_with_BMI)	22
	Arthritis,_Juvenile_Rheumatoid	22
	Type_1_diabetes_autoantibodies	21
	Pulmonary_function_(interaction)	21
	Orofacial_clefts	21
	Interstitial_lung_disease	21
	Homocysteine_levels	21
	Epithelial_ovarian_cancer	21
	Corticobasal_degeneration	21
	Bladder_cancer	21
	Bipolar_disorder	21
	Alopecia_areata	21
	3-hydroxy-1-methylpropylmercapturic_acid_levels_in_smokers	21
	Venous_thromboembolism	20
	Ovarian_cancer	20
	Myeloid_white_cell;(BASO+NEUT)#	20
	Mild_influenza_(H1N1)_infection	20
	Lipid_traits	20
	Cardiovascular_disease_risk_factors	20
	Serum_metabolite_levels	19
	Male-pattern_baldness	19
	Lipoprotein-associated_phospholipase_A2_activity_and_mass	19
	Coronary_artery_disease_or_large_artery_stroke	19
	Autism_spectrum_disorder,_attention_deficit-hyperactivity_disorder,_bipolar_disorder,_major_depressive_disorder,_and_schizophrenia_(combined)	19
	White_matter_hyperintensity_burden	18
	Uric_acid_levels	18
	Smoking_behavior	18
	Pre_bronchodilator_FEV1/FVC_ratio	18
	Monocyte_count	18
	Migraine	18
	Hypospadias	18
	Glaucoma	18
	Electrocardiographic_traits	18
	Breast_cancer_(early_onset)	18
	Bone_properties_(heel)	18
	Bone_mineral_density_(paediatric,_skull)	18
	Progressive_supranuclear_palsy	17
	Cholangitis,_Primary_Sclerosing	17
	Self-reported_allergy	16
	Renal_function-related_traits_(BUN)	16
	Myeloid_white_cell;(NEUT+EO)#	16
	Melanoma	16
	Intraocular_pressure	16
	Hypertension	16
	Hair_color	16
	Bone_mineral_density_(hip)	16
	Acylcarnitine_levels	16
	Weight	15
	Urate_levels_in_overweight_individuals	15
	Systemic_lupus_erythematosus_and_Systemic_sclerosis	15
	QRS_duration	15
	Lipoprotein_(a)_levels	15
	Lipoprotein_(a)_-_cholesterol_levels	15
	Intracranial_aneurysm	15
	Behcet's_disease	15
	Atrial_fibrillation	15
	Asthma_(childhood_onset)	15
	Ankylosing_spondylitis	15
	Telomere_length	14
	Red_blood_cell_fatty_acid_levels	14
	Pre_bronchodilator_FEV1	14
	Lung_disease_severity_in_cystic_fibrosis	14
	Liver_enzyme_levels_(alkaline_phosphatase)	14
	Fractional_exhaled_nitric_oxide_(childhood)	14
	Educational_attainment	14
	Cotinine_glucuronidation	14
	Coronary_artery_disease_or_ischemic_stroke	14
	Chronic_obstructive_pulmonary_disease-related_biomarkers	14
	Amyotrophic_lateral_sclerosis	14
	Alzheimer's_disease_(cognitive_decline)	14
	Sudden_cardiac_arrest	13
	Serum_albumin_level	13
	Primary_tooth_development_(number_of_teeth)	13
	Immune_reponse_to_smallpox_(secreted_IFN-alpha)	13
	Hematology_traits	13
	Graves'_disease	13
	Glaucoma_(primary_open-angle)	13
	Eye_color	13
	Elevated_serum_carcinoembryonic_antigen_levels	13
	Bone_mineral_density_(paediatric,_total_body_less_head)	13
	Sex_hormone_levels	12
	Restless_legs_syndrome	12
	Prostate-specific_antigen_levels	12
	Polychlorinated_biphenyl_levels	12
	Paget's_disease	12
	Obesity_(early_onset_extreme)	12
	Metabolic_syndrome_(bivariate_traits)	12
	Kawasaki_disease	12
	Infant_length	12
	Gout	12
	Blood_and_toenail_selenium_levels	12
	White_blood_cell_types	11
	Tumor_biomarkers	11
	Serum_protein_levels_(sST2)	11
	Schizophrenia_or_bipolar_disorder	11
	Resting_heart_rate	11
	Primary_tooth_development_(time_to_first_tooth_eruption)	11
	Narcolepsy	11
	Intracranial_volume	11
	Influenza_A_(H1N1)_infection	11
	Inflammatory_biomarkers	11
	Idiopathic_pulmonary_fibrosis	11
	Glycemic_traits_(pregnancy)	11
	Glycemic_traits	11
	Esophageal_cancer	11
	Carotid_intima_media_thickness	11
	Calcium_levels	11
	Brain_connectivity	11
	Amyotrophic_lateral_sclerosis_(sporadic)	11
	Alzheimer's_disease_biomarkers	11
	Vitamin_D_levels	10
	Total_bilirubin_levels_in_HIV-1_infection	10
	Thyroid_cancer	10
	Tanning	10
	Systemic_sclerosis	10
	Sitting_height_ratio	10
	Response_to_serotonin_reuptake_inhibitors_in_major_depressive_disorder_(plasma_drug_and_metabolite_levels)	10
	Neuroblastoma	10
	Mean_corpuscular_hemoglobin_concentration	10
	Mean_arterial_pressure	10
	Magnesium_levels	10
	Lung_adenocarcinoma	10
	Liver_enzyme_levels	10
	Immune_response_to_smallpox_vaccine_(IL-6)	10
	Folate_pathway_vitamin_levels	10
	Fasting_insulin-related_traits_(interaction_with_BMI)	10
	Chronic_obstructive_pulmonary_disease	10
	Central_corneal_thickness	10
	Bone_mineral_density_(paediatric,_upper_limb)	10
	Bone_mineral_density_(paediatric,_lower_limb)	10
	Birth_weight	10
	Activated_partial_thromboplastin_time	10
	Thyroiditis,_Autoimmune	9
	Proinsulin_levels	9
	Plasma_omega-6_polyunsaturated_fatty_acid_levels_(linoleic_acid)	9
	Non-cardia_gastric_cancer	9
	Myocardial_infarction_(early_onset)	9
	Myeloid_white_cell;GRAN#	9
	Myeloid_white_cell;BASO%GRAN	9
	Iron_status_biomarkers_(transferrin_levels)	9
	Inflammatory_bowel_disease_(early_onset)	9
	Hodgkin's_lymphoma	9
	Hemoglobin	9
	Hematological_parameters	9
	Epilepsy_and_lamotrigine-induced_maculopapular_eruptions	9
	Endometriosis	9
	Dupuytren's_disease	9
	Dehydroepiandrosterone_sulphate_levels	9
	C-reactive_protein_and_white_blood_cell_count	9
	Blood_pressure_measurement_(high_sodium_and_potassium_intervention)	9
	Atopic_march	9
	Asthma_and_hay_fever	9
	Amino_acid_levels	9
	Adolescent_idiopathic_scoliosis	9
	Verbal_declarative_memory	8
	Urate_levels_in_lean_individuals	8
	Tuberculosis	8
	Thyroid_volume	8
	Stroke_(ischemic)	8
	Stroke	8
	Response_to_hepatitis_C_treatment	8
	Response_to_anti-retroviral_therapy_(ddI/d4T)_in_HIV-1_infection_(Grade_3_peripheral_neuropathy)	8
	Pulse_pressure	8
	Protein_quantitative_trait_loci	8
	Protein_C_levels	8
	PR_segment	8
	Ovarian_cancer_in_BRCA1_mutation_carriers	8
	Neutrophil_count	8
	N-glycan_levels	8
	Multiple_myeloma	8
	Mammographic_density_(dense_area)	8
	Immune_reponse_to_smallpox_(secreted_IL-2)	8
	IgE_and_Allergic_Sensitization	8
	Hepcidin_levels	8
	Hepatitis	8
	Hematocrit	8
	HDL_Cholesterol_-_Triglycerides_(HDLC-TG)	8
	Esophageal_cancer_(squamous_cell)	8
	Eosinophilic_esophagitis	8
	Emphysema_imaging_phenotypes	8
	Diisocyanate-induced_asthma	8
	Corneal_curvature	8
	Coffee_consumption	8
	Allergic_sensitization	8
	Allergic_rhinitis	8
	Waist_Circumference_-_Triglycerides_(WC-TG)	7
	Soluble_ICAM-1	7
	Serum_uric_acid_levels	7
	Serum_prostate-specific_antigen_levels	7
	Renal_function-related_traits_(sCR)	7
	Renal_cell_carcinoma	7
	Psoriatic_arthritis	7
	Percent_mammographic_density	7
	Palmitoleic_acid_(16:1n-7)_plasma_levels	7
	Non-glioblastoma_glioma	7
	Multiple_cancers_(lung_cancer,_gastric_cancer,_and_squamous_cell_carcinoma)	7
	Menarche_and_menopause_(age_at_onset)	7
	Light_vs._dark_hair_color	7
	Infantile_hypertrophic_pyloric_stenosis	7
	Immune_reponse_to_smallpox_(secreted_IL-1beta)	7
	IgE_levels	7
	Glomerular_filtration_rate	7
	Gamma_glutamyl_transpeptidase	7
	Febrile_seizures	7
	Erythrocyte_sedimentation_rate	7
	Ear_morphology	7
	Cutaneous_malignant_melanoma	7
	Coagulation_factor_levels	7
	Chronic_bronchitis_and_chronic_obstructive_pulmonary_disease	7
	Brown_vs._non-brown_hair_color	7
	Breast_size	7
	Acute_lymphoblastic_leukemia_(B-cell_precursor)	7
	Vitamin_B12_levels	6
	Triglycerides-Blood_Pressure_(TG-BP)	6
	Ticagrelor_levels_in_individuals_with_acute_coronary_syndromes_treated_with_ticagrelor	6
	Testicular_germ_cell_cancer	6
	Sj√∂gren's_syndrome	6
	Scleroderma,_Systemic	6
	Schizophrenia,_schizoaffective_disorder_or_bipolar_disorder	6
	Renal_function-related_traits_(eGRFcrea)	6
	Plasma_omega-6_polyunsaturated_fatty_acid_levels_(gamma-linolenic_acid)	6
	Plasma_omega-6_polyunsaturated_fatty_acid_levels_(dihomo-gamma-linolenic_acid)	6
	Plasma_omega-6_polyunsaturated_fatty_acid_levels_(arachidonic_acid)	6
	Plasma_homocysteine_levels_(post-methionine_load_test)	6
	Personality_traits_in_bipolar_disorder	6
	PR_interval_in_Tripanosoma_cruzi_seropositivity	6
	Osteoprotegerin_levels	6
	Ossification_of_the_posterior_longitudinal_ligament_of_the_spine	6
	Mitral_valve_prolapse	6
	Migraine_without_aura	6
	Major_depressive_disorder	6
	Hypertriglyceridemia	6
	Hemoglobin_levels	6
	Glioma_(high-grade)	6
	Glaucoma_(primary_angle_closure)	6
	Forced_vital_capacity	6
	Follicular_lymphoma	6
	Exudative_age-related_macular_degeneration	6
	DNA_methylation_(parent-of-origin)	6
	Circulating_vasoactive_peptide_levels	6
	Blood_pressure_measurement_(low_sodium_intervention)	6
	Blood_pressure_(smoking_interaction)	6
	Black_vs._red_hair_color	6
	Black_vs._blond_hair_color	6
	Alcohol_consumption_(transferrin_glycosylation)	6
	Alcohol_consumption	6
	Acne_(severe)	6
	Wilms_tumor	5
	White_matter_microstructure_(global_fractional_anisotropy)	5
	Vincristine-induced_peripheral_neuropathy_in_acute_lymphoblastic_leukemia	5
	Upper_aerodigestive_tract_cancers	5
	Soluble_interleukin-2_receptor_subunit_alpha	5
	Skin_colour_saturation	5
	Response_to_antipsychotic_treatment	5
	Pubertal_anthropometrics	5
	Platelet_aggregation	5
	Phosphorus_levels	5
	Osteoarthritis	5
	Nonsyndromic_cleft_lip_with_or_without_cleft_palate	5
	Non-albumin_protein_levels	5
	Nicotine_dependence	5
	Mucinous_ovarian_carcinoma	5
	Malaria	5
	Lp_(a)_levels	5
	Lifespan	5
	Ischemic_stroke	5
	Iron_status_biomarkers_(transferrin_saturation)	5
	Iron_status_biomarkers_(iron_levels)	5
	Iron_status_biomarkers_(ferritin_levels)	5
	Iris_characteristics	5
	Insulin-like_growth_factors	5
	Hypothyroidism	5
	Hirschsprung_disease	5
	Hippocampal_volume	5
	Glioblastoma	5
	Gastric_cancer	5
	Fetal_hemoglobin_levels	5
	Fat_body_mass	5
	Esophageal_squamous_cell_carcinoma	5
	Eosinophil_counts	5
	Electrocardiographic_conduction_measures	5
	Creatinine_levels	5
	Conduct_disorder_(symptom_count)	5
	Common_traits_(Other)	5
	Cognitive_function	5
	Coffee_consumption_(cups_per_day)	5
	Chronic_obstructive_pulmonary_disease_(severe)	5
	Chronic_hepatitis_C_infection	5
	Cervical_cancer	5
	Cerebrospinal_fluid_levels_of_Alzheimer's_disease-related_proteins	5
	Butyrylcholinesterase_levels	5
	Blood_pressure_measurement_(cold_pressor_test)	5
	Blond_vs_non-blond_hair_color	5
	Blond_vs._brown_hair_color	5
	Biomedical_quantitative_traits	5
	Axial_length	5
	Aortic_root_size	5
	Androgen_levels	5
	Alcohol_dependence	5
	Adiposity	5
	Vitamin_D_insufficiency	4
	Vascular_endothelial_growth_factor_levels	4
	Urinary_bladder_cancer	4
	Urate_levels_in_obese_individuals	4
	Type_2_diabetes_and_other_traits	4
	Thyroid_peroxidase_antibody_positivity	4
	Thyroid_function	4
	Thrombin_generation_potential_phenotypes	4
	Symmetrical_dimethylarginine_levels	4
	Subcutaneous_adipose_tissue	4
	Stearic_acid_(18:0)_plasma_levels	4
	Soluble_levels_of_adhesion_molecules	4
	Sjogren's_Syndrome	4
	Serum_total_protein_level	4
	Serum_alkaline_phosphatase_levels	4
	Retinal_vascular_caliber	4
	Response_to_statin_therapy_(LDL-C)	4
	Response_to_statin_therapy	4
	Renal_function_and_chronic_kidney_disease	4
	Renal_function-related_traits_(urea)	4
	Recombination_measurement	4
	Primary_sclerosing_cholangitis	4
	Plasma_plasminogen_activator_levels	4
	Plasma_lactate_levels	4
	Permanent_tooth_development	4
	Other_erythrocyte_phenotypes	4
	Osteoporosis	4
	Non-obstructive_azoospermia	4
	Myasthenia_gravis	4
	Multiple_myeloma_and_monoclonal_gammopathy	4
	Multiple_myeloma_(hyperdiploidy)	4
	Migraine_-_clinic-based	4
	Low_vWF_levels	4
	Lobe_size	4
	Liver_enzyme_levels_(alanine_transaminase)	4
	Kidney_stones	4
	Kidney_function_decline_traits	4
	Insulin-related_traits	4
	Inguinal_hernia	4
	Immune_reponse_to_smallpox_(secreted_IL-12p40)	4
	Hormone_measurements	4
	Homoarginine_levels	4
	Head_circumference_(infant)	4
	Gamma_gluatamyl_transferase_levels	4
	Freckling	4
	Febrile_seizures_(MMR_vaccine-related)	4
	Fasting_insulin-related_traits	4
	Exfoliation_syndrome	4
	Epilepsy_(generalized)	4
	Epilepsy	4
	Disc_degeneration_(lumbar)	4
	Diffuse_large_B_cell_lymphoma	4
	Dietary_macronutrient_intake	4
	Diabetic_retinopathy	4
	Cutaneous_psoriasis	4
	Chronic_obstructive_pulmonary_disease_(moderate_to_severe)	4
	Bronchodilator_response_in_asthma_(inhaled_corticosteroid_treatment_interaction)	4
	Brain_structure	4
	Blue_vs._green_eyes	4
	Autism	4
	Amyloid_A_serum_levels	4
	Alzheimer's_disease_in_APOE_e4+_carriers	4
	Age-related_macular_degeneration_(CNV)	4
	Abdominal_aortic_aneurysm	4
	vWF_levels	3
	Waist_circumference_and_related_phenotypes	3
	Waist_circumference	3
	Vitamin_E_levels	3
	Vitamin_B_levels_in_ischemic_stroke	3
	Very_long-chain_saturated_fatty_acid_levels_(fatty_acid_20:0)	3
	Uterine_fibroids	3
	Urinary_uromodulin_levels	3
	Type_1_diabetes_nephropathy	3
	Type_1_diabetes_and_autoimmune_thyroid_diseases	3
	Two-hour_glucose_challenge	3
	Toenail_selenium_levels	3
	Thyroid_peroxidase_antibody_levels	3
	Testicular_cancer	3
	Temperament_(bipolar_disorder)	3
	Sporadic_pituitary_adenoma	3
	Skin_pigmentation	3
	Sickle_cell_anemia_(haemolysis)	3
	Sexual_dimorphism_in_anthropometric_traits	3
	Serum_thyroid-stimulating_hormone_levels	3
	Serum_dimethylarginine_levels_(symmetric)	3
	Serum_alpha1-antitrypsin_levels	3
	Select_biomarker_traits	3
	Scoliosis	3
	Response_to_tocilizumab_in_rheumatoid_arthritis	3
	Red_vs_non-red_hair_color	3
	Pulmonary_emphysema	3
	Prostate_cancer_aggressiveness	3
	Prostate_cancer_(early_onset)	3
	Post-traumatic_stress_disorder	3
	Plasminogen_activator_inhibitor_type_1_levels_(PAI-1)	3
	Plasma_plasminogen_levels	3
	Phytosterol_levels	3
	Percentage_gas_trapping	3
	Pediatric_bone_mineral_content_(radius)	3
	P_wave_duration	3
	Optic_disc_parameters	3
	Non-melanoma_skin_cancer	3
	Neuritic_plaque	3
	Nephrolithiasis	3
	Nasopharyngeal_carcinoma	3
	NT-proBNP_levels_in_acute_coronary_syndrome	3
	Myeloproliferative_neoplasms	3
	Matrix_metalloproteinase_levels	3
	Major_mood_disorders	3
	Longevity_(90_years_and_older)	3
	Lewy_body_disease	3
	Left_inferior_lateral_ventricle_volume_(Cerebrospinal_fluid_biomarker_status_interaction)	3
	Keloid	3
	Immune_reponse_to_smallpox_(secreted_IL-10)	3
	IgM_levels	3
	Hippocampal_atrophy	3
	Hepatitis_B	3
	Helix_rolling	3
	Freckles	3
	Follicule_stimulating_hormone	3
	Facial_pigmentation	3
	Eye_color_traits	3
	Ewing_sarcoma	3
	Esophageal_cancer_and_gastric_cancer	3
	Endothelial_growth_factor_levels	3
	Drinking_behavior	3
	Digestive_system_disease_(Barrett's_esophagus_and_esophageal_adenocarcinoma_combined)	3
	DNA_methylation_(variation)	3
	D-dimer_levels	3
	Creutzfeldt-Jakob_disease_(variant)	3
	Cortical_thickness	3
	Coronary_artery_calcification	3
	Cirrhosis_(alcohol_related)	3
	Cingulate_cortical_amyloid_beta_load	3
	Cerebrospinal_AB1-42_levels	3
	Cardiac_muscle_measurement	3
	Brugada_syndrome	3
	Bone_mineral_accretion_in_asthma_(oral_corticosteroid_dose_interaction)	3
	Bitter_taste_perception	3
	Bipolar_disorder_(body_mass_index_interaction)	3
	Beta_thalassemia/hemoglobin_E_disease	3
	Attention_deficit_hyperactivity_disorder	3
	Apolipoprotein_Levels	3
	Anthropometric_traits_in_newborns	3
	Alzheimer's_disease_in_APOE_e4-_carriers	3
	Alcohol_dependence_(age_at_onset)	3
	Airway_wall_thickness	3
	Airflow_obstruction	3
	Age-related_macular_degeneration_(GA)	3
	ADAMTS13_activity	3
	Vogt-Koyanagi-Harada_syndrome	2
	Very_long-chain_saturated_fatty_acid_levels_(fatty_acid_24:0)	2
	Very_long-chain_saturated_fatty_acid_levels_(fatty_acid_22:0)	2
	Urate_levels_(BMI_interaction)	2
	Thyrotoxic_hypokalemic_periodic_paralysis	2
	Tetralogy_of_Fallot	2
	Testosterone_levels	2
	Systolic_blood_pressure_(alcohol_consumption_interaction)	2
	Survival_in_colorectal_cancer_(distant_metastatic)	2
	Superior_frontal_gyrus_grey_matter_volume	2
	Sunburns	2
	Skin_sensitivity_to_sun	2
	Severe_malaria	2
	Serum_vitamin_D-binding_protein_levels	2
	Serum_lipase_activity	2
	Serum_dimethylarginine_levels_(asymmetric/symetric_ratio)	2
	Sclerosing_cholangitis_and_ulcerative_colitis_(combined)	2
	Sagittal_craniosynostosis	2
	Retinol_levels	2
	Retinal_arteriolar_caliber	2
	Resting_oxygen_saturation_in_chronic_osbtructive_pulmonary_disease_(pulse_oxymetry)	2
	Response_to_statins_(LDL_cholesterol_change)	2
	Response_to_inhaled_glucocorticoid_treatment_in_asthma_(percentage_change_of_FEV1)	2
	Response_to_citalopram_treatment	2
	Response_to_bleomycin_(chromatid_breaks)	2
	Response_to_antidepressants	2
	Response_to_Vitamin_E_supplementation	2
	Resistin_levels	2
	Refractive_astigmatism	2
	Pulmonary_artery_enlargement_in_chronic_obstructive_pulmonary_disease	2
	Pulmonary_artery_enlargement_and_chronic_obstructive_pulmonary_disease	2
	Prothrombin_time	2
	Post-traumatic_stress_disorder_(asjusted_for_relatedness)	2
	Plasma_thyroid-stimulating_hormone_levels	2
	Plasma_renin_activity_levels	2
	Plasma_omega-3_polyunsaturated_fatty_acid_levels_(alphalinolenic_acid)	2
	Plasma_cystastin_c_levels_in_acute_coronary_syndrome	2
	Peripheral_artery_disease	2
	Perceived_skin_darkness	2
	Pediatric_areal_bone_mineral_density_(radius)	2
	Paraoxonase_activity	2
	Panic_disorder	2
	Pancreatitis	2
	PCA3_expression_level	2
	Osteosarcoma	2
	Osteoporosis-related_phenotypes	2
	Osteoarthritis_(hip)	2
	Optic_nerve_measurement_(disc_area)	2
	Obesity_(extreme)	2
	Nonalcoholic_fatty_liver_disease	2
	Nicotine_glucouronidation	2
	Neurofibrillary_tangles	2
	Nephropathy	2
	Narcolepsy_with_cataplexy	2
	Myopia_(severe)	2
	Multiple_myeloma_(IgH_translocation)	2
	Morbidity-free_survival	2
	Monocyte_chemoattractant_protein-1	2
	Metastasis_at_diagnosis_in_osteosarcoma	2
	Metabolite_levels__(X-11787)	2
	Metabolite_levels_(Pyroglutamine)	2
	Mesial_temporal_lobe_epilepsy_with_hippocampal_sclerosis	2
	Lymphoma	2
	Longevity	2
	Lobe_attachment	2
	Lipoprotein-associated_phospholipase_A2_activity_change_in_response_to_statin_therapy	2
	Lead_levels_in_blood	2
	Laryngeal_squamous_cell_carcinoma	2
	L-arginine_levels	2
	Ischemic_stroke_(large_artery_atherosclerosis)	2
	Ischemic_stroke_(cardioembolic)	2
	Interleukin-18_levels	2
	Immune_response_to_measles-mumps-rubella_vaccine	2
	IgG_levels	2
	IgE_grass_sensitization	2
	Idiopathic_membranous_nephropathy	2
	Hyperopia	2
	Homeostasis_model_assessment_of_insulin_resistance_(interaction)	2
	Homeostasis_model_assessment_of_beta-cell_function_(interaction)	2
	Hereditary_hemochromatosis-related_traits_(HFE_mutation_homozygotes)	2
	Hepatocellular_carcinoma_in_hepatitis_B_infection	2
	Hepatocellular_carcinoma	2
	Hepatitis_C_induced_liver_fibrosis	2
	Helicobacter_pylori_serologic_status	2
	Height_adjusted_BMI	2
	HbA2_levels	2
	Hair_morphology	2
	Glucose_homeostasis_traits	2
	Gastric_adenocarcinoma_(histologically_verified)	2
	Gait_rhythm	2
	Folding_of_antihelix	2
	Fetal_hemoglobin_levels_in_sickle_cell_anemia	2
	Febrile_seizures_(MMR_vaccine-unrelated)	2
	Fasting_insulin_(interaction)	2
	Factor_VII_levels	2
	F-cell_distribution	2
	Exhaled_carbon_monoxide_levels	2
	Exfoliation_glaucoma_or_exfoliation_syndrome	2
	Esophageal_cancer__(alcohol_interaction)	2
	Eosinophilic_esophagitis_(pediatric)	2
	Entorhinal_cortical_volume_(Alzheimer's_disease_interaction)	2
	Duodenal_ulcer	2
	Dilated_cardiomyopathy	2
	Diabetic_kidney_disease	2
	Diabetes_(gestational)	2
	Dental_caries	2
	Dementia_and_core_Alzheimer's_disease_neuropathologic_changes	2
	Delta-6_desaturase_activity	2
	Cystatin_C	2
	Cutaneous_nevi	2
	Crohn's_disease_and_psoriasis	2
	Crohn's_disease_and_celiac_disease	2
	Crohn's_disease-related_phenotypes	2
	Creutzfeldt-Jakob_disease_(sporadic)	2
	Creatine_kinase_in_statin_users	2
	Cortical_structure_(interaction)	2
	Congenital_heart_malformation	2
	Complement_C3_and_C4_levels	2
	Colorectal_or_endometrial_cancer	2
	Colorectal_cancer_(aspirin_and/or_NSAID_use_interaction)	2
	Cognitive_decline_(age-related)	2
	Cognitive_decline	2
	Cocaine_dependence	2
	Clozapine-induced_cytotoxicity	2
	Cleft_lip	2
	Circulating_myeloperoxidase_levels_(serum)	2
	Circulating_myeloperoxidase_levels_(plasma)	2
	Cervical_artery_dissection	2
	Cerebrospinal_AB1-42_levels_in_Alzheimer's_disease_dementia	2
	Carotenoid_and_tocopherol_levels	2
	Cardiac_Troponin-T_levels	2
	Capecitabine_sensitivity	2
	Caffeine_consumption	2
	Breast_cancer_(survival)	2
	Breast_cancer_(male)	2
	Breast_cancer_(estrogen-receptor_negative,_progesterone-receptor_negative,_and_human_epidermal_growth_factor-receptor_negative)	2
	Breast_Cancer_in_BRCA1_mutation_carriers	2
	Bone_mineral_density_(hip)_and_age_at_menarche	2
	Body_mass_index_(age_interaction)	2
	Body_mass_(lean)	2
	Blood_trace_element_(Zn_levels)	2
	Blood_trace_element_(Se_levels)	2
	Blood_trace_element_(Cu_levels)	2
	Blood_pressure_measurement_(high_sodium_intervention)	2
	Birth_length	2
	Bipolar_disorder_or_major_depressive_disorder_(combined)	2
	Bipolar_disorder_and_schizophrenia	2
	B-type_natriuretic_peptide	2
	Autism_spectrum_disorder-related_traits	2
	Atrial_fibrillation/atrial_flutter	2
	Asymmetrical_dimethylarginine_levels	2
	Arsenic_metabolism	2
	Angiotensin-converting_enzyme_activity	2
	Alzheimer's_disease_(age_of_onset)	2
	Alzheimer's_disease_(APOE_e4_interaction)	2
	Age-related_nuclear_cataracts	2
	Age-related_macular_degeneration_(extreme_sampling)	2
	Adverse_response_to_chemotherapy_in_breast_cancer_(alopecia)	2
	Addiction	2
	Acenocoumarol_maintenance_dosage	2
	AR-C124910XX_levels_in_individuals_with_acute_coronary_syndromes_treated_with_ticagrelor	2
	YKL-40_levels	1
	Wegener's_granulomatosis	1
	Volumetric_brain_MRI	1
	Vitiligo_(non-segmental)	1
	Visceral_fat	1
	Visceral_adipose_tissue/subcutaneous_adipose_tissue_ratio	1
	Vaspin_levels	1
	Vascular_dementia	1
	Urinary_albumin_excretion	1
	Urinary_albumin-to-creatinine_ratio	1
	Ulcerative_colitis_or_Crohn's_disease	1
	Trait	1
	Tourette_syndrome	1
	Thyroid_stimulating_hormone	1
	Thyroid_cancer_(Papillary,_radiation-related)	1
	Thoracic_aortic_aneurysms_and_dissections	1
	Thoracic-to-hip_circumference_ratio	1
	Thiazide-induced_adverse_metabolic_effects_in_hypertensive_patients	1
	Suicide_attempts_in_bipolar_disorder	1
	Staphylococcus_aureus_nasal_carriage_(intermittent)	1
	Squamous_cell_carcinoma	1
	Spontaneous_preterm_birth_(preterm_birth)	1
	Speech_perception_in_dyslexia	1
	Soluble_leptin_receptor_levels	1
	Soluble_E-selectin_levels	1
	Social_communication_problems	1
	Sleep_duration	1
	Sleep-related_phenotypes	1
	Setpoint_viral_load_in_HIV-1_infection	1
	Serum_ferritin_levels	1
	Serum_dimethylarginine_levels_(asymmetric)	1
	Serum_ceruloplasmin_levels	1
	Serum_VEGFR2_concentration	1
	Serum_IgA_levels	1
	Sensory_disturbances_after_bilateral_sagittal_split_ramus_osteotomy	1
	Schizophrenia,_bipolar_disorder_and_depression_(combined)	1
	Sarcoidosis	1
	Rotator_cuff_tears	1
	Ribavirin-induced_anemia	1
	Rheumatoid_arthritis_(ACPA-negative)	1
	Response_to_temozolomide	1
	Response_to_tamoxifen_in_breast_cancer	1
	Response_to_serotonin_reuptake_inhibitors_in_non-psychotic_unipolar_depression	1
	Response_to_serotonin_reuptake_inhibitors_in_major_depressive_disorder	1
	Response_to_radiotherapy_in_prostate_cancer_(toxicity)	1
	Response_to_radiotherapy_in_cancer_(late_toxicity)	1
	Response_to_montelukast_in_asthma_(change_in_FEV1)	1
	Response_to_metformin_in_type_2_diabetes_(glycemic)	1
	Response_to_metformin	1
	Response_to_interferon_beta_therapy	1
	Response_to_gemcitabine_in_pancreatic_cancer	1
	Response_to_fenofibrate_(adiponectin_levels)	1
	Response_to_fenofibrate	1
	Response_to_clopidogrel_therapy	1
	Response_to_chemotherapy_in_breast_cancer_hypertensive_cases_(cumulative_dose)_(bevacizumab)	1
	Response_to_antipsychotic_therapy_(extrapyramidal_side_effects)	1
	Response_to_anti-retroviral_therapy_(ddI/d4T)_in_HIV-1_infection_(Grade_2_peripheral_neuropathy)	1
	Response_to_amphetamines	1
	Response_to_alcohol_consumption_(flushing_response)	1
	Response_to_Dalcetrapib_treatment_in_acute_coronary_syndrome	1
	Renal_transplant_outcome	1
	Relative_hand_skill_in_reading_disability	1
	Recombination_rate_(males)	1
	Recombination_rate_(females)	1
	Recombination_measurement_(males)	1
	Recombination_measurement_(females)	1
	Recalcitrant_atopic_dermatitis	1
	Reading_or_mathematical_ability	1
	RR_interval_(heart_rate)	1
	Quantitative_traits	1
	Pulmonary_function_decline	1
	Pulmonary_arterial_hypertension_(without_BMPR2_mutations)	1
	Puberty_onset_(genital_enlargement)	1
	Puberty_onset	1
	Psychosis_and_Alzheimer's_disease	1
	Protein_biomarker	1
	Progression_free_survival_in_metastatic_colorectal_cancer_(treatment_interaction)	1
	Progranulin_levels	1
	Postprandial_triglyceride_response_to_high_fat_diet_meal	1
	Pneumoconiosis_in_silica_exposure	1
	Platelet_thrombus_formation	1
	Plasma_omega-6_polyunsaturated_fatty_acid_levels_(adrenic_acid)	1
	Plasma_homocysteine_levels	1
	Pit-and-Fissure_caries	1
	Pharmacokinetics_of_antiepileptic_drugs_in_severe_mental_disorder_(concentration_drug_ratio)	1
	Personality_dimensions	1
	Periodontitis	1
	Pericardial_fat	1
	Parkinson_disease_and_lewy_body_pathology	1
	Parent_of_origin_effect_on_language_impairment_(paternal)	1
	Palmitic_acid_(16:0)_plasma_levels	1
	Pain	1
	Paclitaxel-induced_cytotoxicity	1
	Otosclerosis	1
	Otitis_media_(chronic/recurrent)	1
	Osteoarthritis_(hand,_severe)	1
	Orthostatic_hypotension	1
	Orofacial_clefts_(interaction)	1
	Opioid_sensitivity	1
	Oleic_acid_(18:1n-9)_plasma_levels	1
	Odorant_perception_(isobutyraldehyde)	1
	Odorant_perception_(&beta;-ionone)	1
	Objective_response_to_lithium_treatment	1
	Obesity_in_adult_survivors_of_childhood_cancer_exposed_to_cranial_radiation	1
	Non-small_cell_lung_cancer	1
	Non-alcoholic_fatty_liver_disease_histology_(other)	1
	Non-alcoholic_fatty_liver_disease	1
	Neutrophil_count_in_HIV-infection	1
	Neuroticism	1
	Neuroblastoma_(high-risk)	1
	Neuranatomic_and_neurocognitive_phenotypes	1
	Natriuretic_peptide_levels	1
	Myopia	1
	Musician's_dystonia	1
	Multiple_myeloma_(survival)	1
	Moyamoya_disease	1
	Microalbuminuria	1
	Methotrexate_phramacokinetics_(acute_lymphoblastic_leukemia)	1
	Methotrexate_clearance_(acute_lymphoblastic_leukemia)	1
	Metabolite_levels_(5-HIAA/_MHPG_Ratio)	1
	Meningococcal_disease	1
	Meningioma	1
	Mathematical_ability_in_children_with_dyslexia	1
	Mammographic_density_(non-dense_area)	1
	Mammographic_density	1
	MGMT_methylation_in_smokers	1
	Longitudinal_change_in_brain_amyloid_plaque_burden	1
	Longitudinal_alcohol_consumption	1
	Longevity_(85_years_and_older)	1
	Lipid_levels_in_hepatitis_C_treatment	1
	Lentiform_nucleus_volume	1
	Late-onset_myasthenia_gravis	1
	Large_artery_stroke	1
	Lapatinib-induced_hepatotoxicity	1
	LDL_(oxidized)	1
	Kashin-Beck_disease	1
	Joint_damage_progression_in_ACPA-negative_rheumatoid_arthritis	1
	Ischemic_stroke_(undetermined_subtype)	1
	Ischemic_stroke_(small_artery_occlusion)	1
	Iron_levels	1
	Iris_color	1
	Intracerebral_hemorrhage	1
	Interferon_alpha_levels_in_systemic_lupus_erythematosus	1
	Information_processing_speed	1
	Inflammatory_biomarkers_in_Kawasaki_disease	1
	Immunoglobulin_G_index_levels_in_multiple_sclerosis	1
	Immunoglobulin_A	1
	Immune_reponse_to_smallpox_(secreted_TNF-alpha)	1
	Illicit_drug_use	1
	Ideal_cardiovascular_health_(clinical_and_behavioural)	1
	Ideal_cardiovascular_health_(clinical)	1
	IFN-related_cytopenia	1
	Hypertension_risk_in_short_sleep_duration	1
	Hippocampal_sclerosis_of_aging	1
	Hip_circumference_(psychosocial_stress_interaction)	1
	High_serum_lipase_activity	1
	Hemostatic_factors_and_hematological_phenotypes	1
	Hemoglobin_A2_levels_in_sickle_cell_anemia	1
	Heart_failure	1
	Hearing_function	1
	Hashimoto_thyroiditis_versus_Graves'_disease	1
	Haptoglobin_levels	1
	Handedness_in_dyslexia	1
	HIV-1_control	1
	Gut_microbiome_composition_(winter)	1
	Gut_microbiome_composition_(summer_and_winter)	1
	Glucocorticoid-induced_osteonecrosis	1
	Glomerulosclerosis	1
	Glaucoma_(high_intraocular_pressure)	1
	Glaucoma_(exfoliation)	1
	Gene_methylation_in_lung_tissue	1
	Gallstones	1
	Fuchs's_corneal_dystrophy	1
	Forced_expiratory_volume_in_1_second_(environmental_interaction)	1
	Femoral_neck_bone_geometry_and_menarche_(age_at_onset)	1
	Fasting_plasma_glucose_(childhood)	1
	Factor_VIII_levels	1
	Factor_VII	1
	Facial_morphology	1
	Expressive_vocabulary_in_infants	1
	Estradiol_plasma_levels_(breast_cancer)	1
	Essential_tremor	1
	Esophageal_squamous_cell_cancer_(length_of_survival)	1
	Erythema_nodosum_in_inflammatory_bowel_disease	1
	Erectile_dysfunction_and_prostate_cancer_treatment	1
	Episodic_memory	1
	Epirubicin-induced_leukopenia	1
	Endometrial_cancer	1
	End-stage_renal_disease_in_Type_1_diabetics	1
	End-stage_renal_disease_(non-diabetic)	1
	Electroencephalographic_traits_in_alcoholism	1
	Ejection_fraction_in_Tripanosoma_cruzi_seropositivity	1
	Ear_protrusion	1
	E-selectin_levels	1
	Dysphagia	1
	Drug-induced_liver_injury_(flucloxacillin)	1
	Drug-induced_liver_injury	1
	Drug-induced_Stevens-Johnson_syndrome_or_toxic_epidermal_necrolysis_(SJS/TEN)	1
	Digit_length_ratio	1
	Diastolic_blood_pressure_(alcohol_consumption_interaction)	1
	Depressive_symptoms_(SSRI_exposure_interaction)	1
	Depressive_episodes_in_bipolar_disorder	1
	Depressive_and_manic_episodes_in_bipolar_disorder	1
	Dengue_shock_syndrome	1
	Cytokine_and_corticosteroid-stimulated_IL-6_production	1
	Cytokine-stimulated_IL-6_production	1
	Cystic_fibrosis_severity	1
	Cystic_fibrosis-related_diabetes	1
	Creutzfeldt-Jakob_disease	1
	Cough_in_response_to_angiotensin-converting_enzyme_inhibitor_drugs	1
	Coronary_arterial_lesions_in_patients_with_Kawasaki_disease	1
	Corneal_astigmatism	1
	Contrast_sensitivity	1
	Congenital_left-sided_heart_lesions	1
	Congenital_heart_disease	1
	Colorectal_cancer_(diet_interaction)	1
	Cold_medicine_related_Stevens-Johnson_syndrome/toxic_epidermal_necrolysis_(SJS-TEN)_with_severe_mucosal_involvement	1
	Classic_bladder_exstrophy	1
	Circulating_cell-free_DNA	1
	Chronic_myeloid_leukemia	1
	Chronic_kidney_disease_and_serum_creatinine_levels	1
	Chronic_hepatitis_B_infection	1
	Cholesterol	1
	Cholelithiasis-related_traits_in_sickle_cell_anemia	1
	Childhood_and_early_adolescence_aggressive_behavior	1
	Cerebrospinal_T-tau_levels	1
	Cerebral_amyloid_deposition_positivity_(PET_imaging)	1
	Cerebral_amyloid_deposition_in_APOEe4_non-carriers_(PET_imaging)	1
	Cerebral_amyloid_deposition_(PET_imaging)	1
	Cerebral_amyloid_angiopathy	1
	Carotid_atherosclerosis_in_HIV_infection	1
	Cardiovascular_heart_disease_in_diabetics	1
	Cardiac_structure_and_function	1
	Cardiac_repolarization	1
	Cardiac_hypertrophy	1
	Cardia_gastric_cancer	1
	Calcaneal_bone_ultrasound_measurement_(speed_of_sound)	1
	C4b_binding_protein_levels	1
	C-reactive_protein_levels_in_ischemic_stroke	1
	Bronchodilator_response_in_asthma	1
	Breast_cancer_in_BRCA2_mutation_carriers	1
	Body_mass_index_variance	1
	Body_mass_index_in_asthmatics	1
	Body_mass_index_(change_over_time)	1
	Body_mass_index_(asthmatics)	1
	Body_mass_in_chronic_obstructive_pulmonary_disease	1
	Blue_vs._brown_eyes	1
	Blood_pressure_(anthropometric_measures_interaction)	1
	Black_vs._non-black_hair_color	1
	Bitter_taste_response	1
	Birdshot_chorioretinopathy	1
	Biochemical_measures	1
	Bilirubin_levels_in_extreme_obesity	1
	Biliary_atresia	1
	Beta-trace_protein_levels	1
	Beta-2_microglubulin_plasma_levels	1
	Barrett's_esophagus	1
	B_cell_non-Hodgkin_lymphoma	1
	Asthma_(corticosteroid_response)	1
	Aspirin_hydrolysis_(plasma)	1
	Aspartate_aminotransferase	1
	Asparaginase_hypersensitivity_in_acute_lymphoblastic_leukemia	1
	Arterial_stiffness	1
	Aortic_stiffness	1
	Aortic-valve_calcification	1
	Antitragus_size	1
	Antipsychotic_drug-induced_weight_gain	1
	Antineutrophil_cytoplasmic_antibody-associated_vasculitis	1
	Anticoagulant_levels	1
	Antibody_status_in_Tripanosoma_cruzi_seropositivity	1
	Antibody_level_in_response_to_infection	1
	Anterior_chamber_depth	1
	Ankle-brachial_index	1
	Anger	1
	Alcohol_consumption_(maxi-drinks)	1
	Alcohol_and_nictotine_co-dependence	1
	Airway_responsiveness_in_chronic_obstructive_pulmonary_disease	1
	Airway_imaging_phenotypes	1
	Aging_traits	1
	Aging_(facial)	1
	Aging	1
	Age-related_macular_degeneration_(wet)	1
	Age-related_macular_degeneration_(CNV_vs._GA)	1
	Adverse_response_to_radiation_therapy	1
	Adolescent_idiopathic_scoliosis_(severe)	1
	Adiposity_in_newborns	1
	Acute_lymphoblastic_leukemia_(adolescents_and_young_adults)	1
	AIDS_progression	1
	&beta;2-Glycoprotein_I_(&beta;2-GPI)_plasma_levels	1
